# Supplementary material for: Diurnal oscillations in human salivary microRNA and microbial transcription: Implications for human health and disease
Source: PLoS One. 2018 Jul 18;13(7):e0198288. doi: 10.1371/journal.pone.0198288 (PMC6051604; doi:10.1371/journal.pone.0198288)
Supplement: S1 Table — (XLSX) [file pone.0198288.s001.xlsx]

## Sheet: Sheet1
Supplementary Table 1. Circadian miRNAs in Sample Sets 1 and 2 Identified by Two-Way ANOVA
*p-values for Day, Time, and Day-Time Interaction on 2-way ANOVA are shown
Sample Set 1					Sample Set 2
MicroRNA	Day	Time	Interaction		MicroRNA	Day	Time	Interaction		Overlapping CircaMiR candidates
hsa-miR-3135b	0.99745	2.0316e-06	0.91865		hsa-miR-423-5p	0.094015	0.0017751	0.65574		hsa-miR-423-5p
hsa-miR-598-5p	0.99745	7.695e-06	0.91865		hsa-mir-3185	0.094015	0.0052946	0.54691		hsa-mir-3185
hsa-miR-620	0.99745	1.8221e-05	0.91865		hsa-miR-3916	0.11977	0.0056069	0.29601		hsa-miR-21-5p
hsa-mir-1268a	0.99745	1.8221e-05	0.91865		hsa-let-7f-2-3p	0.14444	0.0056673	0.42762		hsa-miR-130a-3p
hsa-miR-92a-3p	0.99745	1.8221e-05	0.91865		hsa-let-7c-5p	0.15484	0.0028537	0.45098		hsa-miR-6783-3p
hsa-mir-3135b	0.99745	1.8221e-05	0.93292		hsa-miR-21-5p	0.15872	0.0037618	0.45098		hsa-miR-8089
hsa-miR-26a-5p	0.99745	4.4682e-05	0.91865		hsa-miR-130a-3p	0.1778	0.0017751	0.57244		hsa-miR-125b-2-3p
hsa-miR-30e-5p	0.99745	5.4819e-05	0.91865		hsa-miR-6783-3p	0.19511	0.0045367	0.65574		hsa-miR-130b-3p
hsa-miR-374a-3p	0.99745	6.9677e-05	0.91865		hsa-miR-320a	0.19511	0.0076896	0.57244		hsa-miR-26b-5p
hsa-miR-143-3p	0.99745	0.00014312	0.91865		hsa-miR-8089	0.20869	0.0026962	0.45098		hsa-miR-24-3p
hsa-mir-223	0.99745	0.0001538	0.91865		hsa-miR-1277-5p	0.23083	0.0056673	0.37667		hsa-mir-3615.1
hsa-miR-200b-3p	0.99745	0.00018061	0.91865		hsa-miR-125b-2-3p	0.24161	0.0093138	0.42762		hsa-miR-15b-3p
hsa-miR-221-3p	0.99745	0.00018061	0.91865		hsa-miR-130b-3p	0.25896	0.0097765	0.65574		hsa-let-7d-3p
hsa-mir-26a-2	0.99745	0.00018061	0.92592		hsa-miR-26b-5p	0.3333	0.0046754	0.6676		hsa-miR-320c
hsa-miR-223-3p	0.99745	0.00020906	0.91865		hsa-miR-24-3p	0.33337	0.002986	0.4634		hsa-miR-3135b
hsa-miR-182-5p	0.99745	0.00023229	0.91865		hsa-miR-3607-5p	0.33337	0.0041247	0.54691		hsa-miR-423-3p
hsa-miR-183-5p	0.99745	0.00041834	0.91865		hsa-miR-4642	0.33828	6.6054e-05	0.45098		hsa-miR-203a-3p
hsa-miR-378d	0.99745	0.00041834	0.91865		hsa-mir-3615.1	0.34645	0.002819	0.28863		hsa-miR-142-5p
hsa-mir-4289	0.99745	0.00041834	0.91865		hsa-miR-3613-5p	0.36794	0.0028537	0.45098		hsa-miR-22-5p
hsa-mir-1248	0.99745	0.00046057	0.91865		hsa-miR-15b-3p	0.36869	0.0013129	0.65574		hsa-miR-142-3p
hsa-miR-378a-5p	0.99745	0.00056065	0.91865		hsa-let-7d-3p	0.36869	0.0027674	0.70963		hsa-miR-4454.1
hsa-miR-152-3p	0.99745	0.00056209	0.91865		hsa-mir-3615	0.36869	0.002819	0.42762		hsa-miR-200b-3p
hsa-mir-6131	0.99745	0.00061904	0.99632		hsa-miR-15a-5p	0.36869	0.0028537	0.50704		hsa-miR-182-5p
hsa-miR-4436b-3p	0.99745	0.0012507	0.91865		hsa-miR-320c	0.36869	0.0056673	0.82351		hsa-miR-181c-5p
hsa-miR-21-5p	0.99745	0.0014131	0.91865		hsa-miR-340-5p	0.3763	0.0013129	0.65574		hsa-miR-128-3p
hsa-mir-598	0.99745	0.0017952	0.91865		hsa-miR-3135b	0.3763	0.0035762	0.65574		hsa-let-7f-5p
hsa-miR-365a-3p	0.99745	0.0017952	0.91865		hsa-miR-574-3p	0.3871	0.0076896	0.65574		hsa-miR-183-5p
hsa-miR-365b-3p	0.99745	0.0017952	0.91865		hsa-miR-423-3p	0.39521	0.0028537	0.23762		hsa-mir-7156
hsa-miR-199b-3p	0.99745	0.0017952	0.95384		hsa-miR-203a-3p	0.41763	0.0017751	0.61267		hsa-miR-92a-3p
hsa-miR-199a-3p	0.99745	0.0017952	0.95384		hsa-miR-142-5p	0.41763	0.0050088	0.65574		hsa-miR-143-3p
hsa-miR-193b-3p	0.99745	0.0018716	0.91865		hsa-miR-22-5p	0.45214	0.0028537	0.71546		hsa-miR-26a-5p
hsa-miR-6724-5p	0.99745	0.0027653	0.91865		hsa-miR-142-3p	0.45262	0.002819	0.83513		hsa-miR-150-5p
hsa-miR-375	0.99745	0.0027653	0.93292		hsa-miR-625-3p	0.47762	0.0045367	0.57244		hsa-mir-338
hsa-mir-3185	0.99745	0.0035899	0.91865		hsa-miR-96-5p	0.48854	0.0097733	0.42762		hsa-mir-589
hsa-miR-191-5p	0.99745	0.0036497	0.91865		hsa-miR-4454.1	0.48997	0.0044477	0.7525		hsa-miR-1307-5p
hsa-mir-4438	0.99745	0.0036711	0.91865		hsa-miR-200b-3p	0.48997	0.0065492	0.65574		hsa-mir-4712
hsa-mir-183	0.99745	0.0036711	0.95285		hsa-miR-8059	0.4947	0.0057376	0.4634		hsa-mir-486-2
hsa-miR-4794	0.99745	0.0037459	0.91865		hsa-miR-182-5p	0.49509	0.0028537	0.65574		hsa-miR-92b-3p
hsa-mir-5697	0.99745	0.0037797	0.91865		hsa-mir-145	0.53333	0.0043021	0.57244		hsa-miR-22-3p
hsa-miR-95-3p	0.99745	0.0038405	0.92021		hsa-miR-374c-5p	0.56909	0.0076666	0.65574		hsa-miR-205-5p
hsa-miR-27a-5p	0.99745	0.0039702	0.91865		hsa-mir-192	0.58075	0.0056069	0.23825		hsa-miR-345-5p
hsa-mir-6844	0.99745	0.004273	0.92584		hsa-miR-181c-5p	0.60007	0.0035762	0.95111		hsa-miR-93-5p
hsa-miR-429	0.99745	0.0043477	0.91865		hsa-mir-3613	0.60859	0.0017751	0.11543		hsa-miR-25-3p
hsa-miR-532-5p	0.99745	0.0045397	0.92592		hsa-miR-6739-5p	0.61755	0.00014001	0.021052		hsa-mir-223
hsa-miR-23b-3p	0.99745	0.0051477	0.91865		hsa-mir-3908	0.61755	0.0077412	0.53524		hsa-miR-223-3p
hsa-miR-320a	0.99745	0.0051483	0.98489		hsa-miR-128-3p	0.62521	0.00039481	0.60618		hsa-miR-629-5p
hsa-mir-7110	0.99745	0.0053475	0.91865		hsa-let-7f-5p	0.62521	0.0017652	0.60618		hsa-let-7a-2
hsa-miR-142-3p	0.99745	0.0053475	0.91865		hsa-miR-6854-5p	0.62521	0.0017751	0.23762		hsa-miR-199a-3p
hsa-mir-4454	0.99745	0.0054305	0.92605		hsa-miR-183-5p	0.62521	0.0027674	0.65574		hsa-miR-199b-3p
hsa-miR-26b-5p	0.99745	0.0059758	0.91865		hsa-mir-7156	0.62521	0.0028537	0.26796		hsa-miR-140-3p
hsa-miR-548ah-5p	0.99745	0.0061084	0.92176		hsa-miR-92a-3p	0.62521	0.0028537	0.9075		hsa-miR-191-5p
hsa-miR-205-5p	0.99745	0.0062779	0.91865		hsa-miR-143-3p	0.62521	0.0031184	0.93262		hsa-miR-425-5p
hsa-mir-4712	0.99745	0.0062779	0.95447		hsa-miR-26a-5p	0.62521	0.0035227	0.9986		hsa-mir-128-1
hsa-miR-2110	0.99745	0.0066871	0.91865		hsa-miR-150-5p	0.62521	0.0045367	0.45098		hsa-miR-221-3p
hsa-miR-1255a	0.99745	0.0069502	0.91865		hsa-miR-16-5p	0.62521	0.0045367	0.66089		hsa-miR-106b-3p
hsa-miR-590-3p	0.99745	0.0069502	0.91865		hsa-mir-338	0.62521	0.0053657	0.65574		hsa-miR-30e-3p
hsa-let-7a-2	0.99745	0.0069519	0.94513		hsa-mir-589	0.62521	0.0056069	0.65574		hsa-miR-192-5p
hsa-miR-548ad-5p	0.99745	0.0070172	0.91865		hsa-miR-1307-5p	0.62521	0.0057376	0.65574		hsa-miR-215-5p
hsa-miR-24-3p	0.99745	0.0076679	0.91865		hsa-mir-450b	0.62521	0.007204	0.6231		hsa-miR-1180-3p
hsa-let-7f-5p	0.99745	0.0082419	0.91865		hsa-mir-4712	0.62521	0.0080254	0.72336		hsa-miR-3916.1
hsa-mir-374a	0.99745	0.0083518	0.92595		hsa-mir-486-2	0.62726	0.0068945	0.61736		hsa-miR-486-3p
hsa-miR-4457	0.99745	0.0083633	0.92592		hsa-miR-92b-3p	0.6291	0.0069864	0.92652
hsa-mir-6841	0.99745	0.0091843	0.94798		hsa-miR-22-3p	0.64895	0.0028537	0.65574
hsa-miR-6826-5p	0.99745	0.0098554	0.91865		hsa-miR-205-5p	0.65209	0.0049174	0.97761
hsa-mir-1915	0.99745	0.010113	0.91865		hsa-miR-375	0.69188	0.00091487	0.82524
hsa-miR-1255b-5p	0.99745	0.010317	0.91865		hsa-miR-345-5p	0.6946	6.6054e-05	0.81561
hsa-miR-3915	0.99745	0.010317	0.91865		hsa-miR-3202	0.71649	0.0012837	0.65607
hsa-miR-4454	0.99745	0.010404	0.91865		hsa-let-7f-2	0.71649	0.0076666	0.61736
hsa-mir-708	0.99745	0.010404	0.91865		hsa-miR-93-5p	0.72367	0.0028537	0.65574
hsa-mir-338	0.99745	0.010404	0.91865		hsa-miR-25-3p	0.73103	0.0022466	0.65574
hsa-miR-320b	0.99745	0.011606	0.96841		hsa-mir-223	0.73665	0.0035762	0.85551
hsa-miR-200a-3p	0.99745	0.011642	0.91865		hsa-miR-338-3p	0.7378	0.0035227	0.66597
hsa-mir-548i-3	0.99745	0.011849	0.91865		hsa-miR-223-3p	0.74112	0.0035762	0.87002
hsa-let-7a-1	0.99745	0.013042	0.91865		hsa-miR-629-5p	0.74693	0.0012837	0.65574
hsa-miR-125b-2-3p	0.99745	0.013555	0.91865		hsa-mir-2355	0.74693	0.0035762	0.60618
hsa-miR-6770-5p	0.99745	0.013883	0.91865		hsa-mir-7-1	0.75072	0.0056069	0.75121
hsa-miR-345-5p	0.99745	0.014099	0.91865		hsa-let-7a-2	0.75631	0.0028537	0.75343
hsa-mir-429	0.99745	0.014099	0.94181		hsa-miR-619-5p	0.79015	0.007369	0.45098
hsa-mir-3065	0.99745	0.014208	0.91865		hsa-miR-199a-3p	0.7969	0.002819	0.77845
hsa-miR-19b-3p	0.99745	0.014208	0.92176		hsa-miR-199b-3p	0.7969	0.002819	0.77845
hsa-miR-221-5p	0.99745	0.015905	0.92176		hsa-miR-140-3p	0.80665	0.0035227	0.92638
hsa-miR-1273g-3p	0.99745	0.016087	0.91865		hsa-mir-7851	0.82665	0.0077131	0.23975
hsa-miR-140-3p	0.99745	0.016841	0.97161		hsa-miR-98-5p	0.83581	0.0016074	0.65574
hsa-miR-130a-3p	0.99745	0.018181	0.91865		hsa-miR-191-5p	0.86273	0.0069864	0.82884
hsa-let-7d-3p	0.99745	0.01915	0.91865		hsa-miR-425-5p	0.86624	0.0035227	0.71991
hsa-mir-34b	0.99745	0.01915	0.91865		hsa-mir-128-1	0.8719	0.0031184	0.61736
hsa-mir-382	0.99745	0.01915	0.91865		hsa-mir-4286	0.8719	0.0094506	0.62723
hsa-mir-3199-2	0.99745	0.01915	0.91865		hsa-miR-221-3p	0.87442	6.6054e-05	0.65574
hsa-miR-128-3p	0.99745	0.019367	0.91865		hsa-miR-222-3p	0.92545	0.0026962	0.65574
hsa-miR-24-2-5p	0.99745	0.019367	0.91865		hsa-miR-106b-3p	0.93266	0.0012837	0.95795
hsa-miR-96-5p	0.99745	0.020138	0.91865		hsa-miR-30e-3p	0.95082	0.0017751	0.7946
hsa-miR-215-5p	0.99745	0.021359	0.93292		hsa-miR-192-5p	0.97373	0.0017751	0.95726
hsa-miR-192-5p	0.99745	0.021359	0.93292		hsa-miR-215-5p	0.97373	0.0017751	0.95726
hsa-miR-486-5p	0.99745	0.021359	0.95547		hsa-miR-1180-3p	0.97373	0.0060439	0.65574
hsa-mir-6499	0.99745	0.02389	0.98202		hsa-miR-3916.1	0.98862	0.0012837	0.23825
hsa-mir-4649	0.99745	0.024055	0.91865		hsa-miR-486-3p	0.99238	0.0068827	0.46463
hsa-mir-6883	0.99745	0.024055	0.91865		hsa-miR-708-5p	0.99688	0.0035762	0.93262
hsa-miR-574-3p	0.99745	0.024055	0.93292
hsa-miR-378f	0.99745	0.024055	0.93501
hsa-mir-549a	0.99745	0.02457	0.91865
hsa-miR-423-5p	0.99745	0.025226	0.91865
hsa-miR-142-5p	0.99745	0.025456	0.97978
hsa-miR-374c-3p	0.99745	0.025748	0.91865
hsa-miR-5001-3p	0.99745	0.025748	0.92719
hsa-mir-1273g	0.99745	0.026194	0.91865
hsa-miR-1266-5p	0.99745	0.028529	0.91865
hsa-miR-1293	0.99745	0.031717	0.91865
hsa-mir-664a	0.99745	0.032183	0.92021
hsa-mir-4768	0.99745	0.03458	0.91865
hsa-miR-329-5p	0.99745	0.035832	0.91865
hsa-mir-5588	0.99745	0.035955	0.91865
hsa-mir-4762	0.99745	0.036049	0.91865
hsa-miR-8058	0.99745	0.036049	0.92592
hsa-miR-5697	0.99745	0.038766	0.91865
hsa-mir-486-2	0.99745	0.038766	0.91865
hsa-mir-126	0.99745	0.038766	0.97415
hsa-mir-31	0.99745	0.038766	0.97759
hsa-miR-203b-3p	0.99745	0.038766	0.97887
hsa-mir-6133	0.99745	0.040296	0.91865
hsa-mir-621	0.99745	0.040296	0.91865
hsa-mir-6510	0.99745	0.041301	0.91865
hsa-mir-96	0.99745	0.041301	0.99807
hsa-mir-365a	0.99745	0.043207	0.91865
hsa-miR-573	0.99745	0.043521	0.97415
hsa-miR-181c-5p	0.99745	0.043753	0.92176
hsa-miR-148b-3p	0.99745	0.045446	0.91865
hsa-miR-135a-5p	0.99745	0.046053	0.91865
hsa-miR-4461	0.99745	0.046053	0.91865
hsa-mir-4510	0.99745	0.046213	0.92176
hsa-miR-29b-3p	0.99745	0.047715	0.91865
hsa-let-7a-5p	0.99745	0.047715	0.91865
hsa-mir-3665	0.99745	0.047715	0.91865
hsa-mir-345	0.99745	0.047715	0.91865
hsa-miR-98-5p	0.99745	0.047715	0.91865
hsa-miR-210-5p	0.99745	0.047715	0.93431
hsa-mir-5100	0.99745	0.047715	0.93744
hsa-mir-6087	0.99745	0.048124	0.91865
hsa-mir-378a	0.99745	0.04886	0.92592
hsa-miR-3065-3p	0.99745	0.049211	0.92176
hsa-mir-6081	0.99745	0.049211	0.92605
hsa-mir-874	0.99745	0.049731	0.97208
