# Supplementary material for: Diurnal oscillations in human salivary microRNA and microbial transcription: Implications for human health and disease
Source: PLoS One. 2018 Jul 18;13(7):e0198288. doi: 10.1371/journal.pone.0198288 (PMC6051604; doi:10.1371/journal.pone.0198288)
Supplement: S3 Table — (XLSX) [file pone.0198288.s003.xlsx]

## Sheet: enrichment.Process
Supplementary Table 3. Pathways Enriched in CircaMiR Target Genes
GO Pathway ID	Pathway Description	Gene count	FDR	Matching proteins in network
GO.0019222	regulation of metabolic process	471	8.54e-23	ABI1,ABL2,ACVR1,ACVR2A,ACVR2B,ADCY1,ADCYAP1,AFF2,AFF3,AFF4,AKAP6,ALX4,ANAPC1,ANK3,ANKRD13C,APBA2,APH1B,APOC2,ARHGAP12,ARHGAP19,ARHGAP21,ARHGEF2,ARID2,ARX,ASH1L,ATM,ATP1B1,ATXN1L,ATXN7L3,BAZ2B,BBC3,BCORL1,BDNF,BHLHE40,BIRC6,BMI1,BMP2K,BNIP2,BRCA1,BRWD3,BVES,CA7,CABP1,CAPRIN2,CASC3,CASK,CASZ1,CBL,CBLB,CBX3,CCNL1,CCNT2,CCNYL1,CD109,CDC73,CDK13,CDKN1B,CDON,CDYL,CHD9,CHN2,CLCN3,CLIP3,CNEP1R1,CNKSR3,CN…
GO.0060255	regulation of macromolecule metabolic process	413	4.93e-22	ABI1,ABL2,ACVR1,ACVR2A,ACVR2B,ADCY1,ADCYAP1,AFF2,AFF3,AFF4,AKAP6,ALX4,ANAPC1,ANK3,ANKRD13C,APBA2,ARHGEF2,ARID2,ARX,ASH1L,ATM,ATP1B1,ATXN1L,ATXN7L3,BAZ2B,BBC3,BCORL1,BDNF,BHLHE40,BIRC6,BMI1,BRCA1,BRWD3,BVES,CAPRIN2,CASC3,CASK,CASZ1,CBL,CBLB,CBX3,CCNL1,CCNT2,CCNYL1,CD109,CDC73,CDK13,CDON,CDYL,CHD9,CLIP3,CNEP1R1,CNKSR3,CNOT6,CNOT6L,CNTN1,COPS8,CPEB1,CPEB2,CREB5,CRKL,CRTAP,CSF1,CSNK1E,CTCFL,CTDSP2,CY…
GO.0031323	regulation of cellular metabolic process	425	8.89e-22	ABI1,ACVR1,ACVR2A,ACVR2B,ADCY1,ADCYAP1,AFF2,AFF3,AFF4,AKAP6,ALX4,ANAPC1,ANKRD13C,APOC2,ARHGEF2,ARID2,ARX,ASH1L,ATM,ATP1B1,ATXN1L,ATXN7L3,BAZ2B,BBC3,BCORL1,BDNF,BHLHE40,BIRC6,BMI1,BRCA1,BRWD3,BVES,CA7,CAPRIN2,CASC3,CASK,CASZ1,CBL,CBX3,CCNL1,CCNT2,CCNYL1,CD109,CDC73,CDK13,CDKN1B,CDON,CDYL,CHD9,CLCN3,CLIP3,CNEP1R1,CNKSR3,CNOT6,CNOT6L,CNR1,COPS8,CPEB1,CPEB2,CREB5,CRKL,CRTAP,CSF1,CSNK1E,CTCFL,CTDSP2,C…
GO.0080090	regulation of primary metabolic process	414	8.89e-22	ABI1,ABL2,ACVR1,ACVR2A,ACVR2B,ADCY1,ADCYAP1,AFF2,AFF3,AFF4,AKAP6,ALX4,ANAPC1,APOC2,ARHGEF2,ARID2,ARX,ASH1L,ATM,ATXN1L,ATXN7L3,BAZ2B,BBC3,BCORL1,BDNF,BHLHE40,BIRC6,BMI1,BRCA1,BRWD3,CAPRIN2,CASC3,CASK,CASZ1,CBL,CBLB,CBX3,CCNL1,CCNT2,CCNYL1,CD109,CDC73,CDK13,CDON,CDYL,CHD9,CLIP3,CNEP1R1,CNKSR3,CNOT6,CNOT6L,CNR1,COPS8,CPEB1,CPEB2,CREB5,CRKL,CRTAP,CSF1,CSNK1E,CTCFL,CTDSP2,CYLD,DACH1,DAZ1,DDX3X,DDX6,DI…
GO.0048523	negative regulation of cellular process	318	6.08e-18	ABI1,ABL2,ACVR1,ACVR2B,ADAM10,ADCYAP1,ADIPOR2,AKAP6,ANAPC1,ANK3,APCDD1,APOC2,ARHGEF2,ARID4A,ARX,ASH1L,ASIC1,ATM,ATXN1L,BAP1,BBC3,BHLHE40,BIRC6,BMI1,BNIP2,BPI,BRCA1,CAPRIN2,CASK,CAST,CBL,CBLB,CBX3,CDC73,CDKN1B,CDYL,CHL1,CLIC2,CLIC4,CLIP3,CNKSR3,CNOT6L,CNR1,COPS8,CPEB1,CPEB2,CRTAP,CSNK1E,CTDSP2,CTDSPL2,CUL5,CUX1,DACH1,DCUN1D3,DDX3X,DDX6,DIXDC1,DLC1,DNAJA1,DNAJB5,DNAJC3,DNMT3A,DST,EFNA1,EFNB2,EGLN1,…
GO.2000112	regulation of cellular macromolecule biosynthetic process	303	6.08e-18	ACVR1,ACVR2A,ACVR2B,ADCYAP1,AFF3,AFF4,ALX4,ARHGEF2,ARID2,ARX,ASH1L,ATXN1L,ATXN7L3,BAZ2B,BCORL1,BDNF,BHLHE40,BMI1,BRCA1,BRWD3,CAPRIN2,CASC3,CASK,CASZ1,CBL,CBX3,CCNL1,CCNT2,CDC73,CDK13,CDKN1B,CDON,CDYL,CHD9,CNOT6,CNOT6L,CPEB1,CPEB2,CREB5,CTCFL,CYLD,DACH1,DAZ1,DDX3X,DDX6,DMRT3,DNA2,DNAJB5,DNMT3A,DUSP1,EFNA1,EGLN1,EIF2C2,EIF2C3,EIF2C4,EIF4A2,EIF4E2,EIF5A2,EIF5B,ELAVL2,ELK3,ELL2,EREG,ESR1,EYA4,FAM105B…
GO.0010556	regulation of macromolecule biosynthetic process	306	1.08e-17	ACVR1,ACVR2A,ACVR2B,ADCYAP1,AFF3,AFF4,ALX4,ANKRD13C,ARHGEF2,ARID2,ARX,ASH1L,ATXN1L,ATXN7L3,BAZ2B,BCORL1,BDNF,BHLHE40,BMI1,BRCA1,BRWD3,CAPRIN2,CASC3,CASK,CASZ1,CBL,CBX3,CCNL1,CCNT2,CD4,CDC73,CDK13,CDKN1B,CDON,CDYL,CHD9,CNOT6,CNOT6L,CPEB1,CPEB2,CREB5,CTCFL,CYLD,DACH1,DAZ1,DDX3X,DDX6,DMRT3,DNA2,DNAJB5,DNMT3A,DUSP1,EFNA1,EGLN1,EIF2C2,EIF2C3,EIF2C4,EIF4A2,EIF4E2,EIF5A2,EIF5B,ELAVL2,ELK3,ELL2,EREG,ESR1…
GO.0010468	regulation of gene expression	318	1.14e-17	ACVR1,ACVR2A,ACVR2B,ADCYAP1,AFF2,AFF3,AFF4,ALX4,ANK3,APBA2,ARHGEF2,ARID2,ARX,ASH1L,ATM,ATP1B1,ATXN1L,ATXN7L3,BAZ2B,BCORL1,BDNF,BHLHE40,BMI1,BRCA1,BRWD3,CAPRIN2,CASC3,CASK,CASZ1,CBL,CBX3,CCNL1,CCNT2,CDC73,CDK13,CDKN1B,CDON,CDYL,CHD9,CNOT6,CNOT6L,CNTN1,CPEB1,CPEB2,CREB5,CSF1,CSNK1E,CTCFL,CYLD,DACH1,DAZ1,DDX3X,DDX6,DMRT3,DNAJB5,EFNA1,EGLN1,EIF2C2,EIF2C3,EIF2C4,EIF4A2,EIF4E2,EIF5A2,EIF5B,ELAVL2,ELK3,…
GO.0009889	regulation of biosynthetic process	318	2.18e-17	ACVR1,ACVR2A,ACVR2B,ADCYAP1,AFF3,AFF4,AKAP6,ALX4,ANKRD13C,APOC2,ARHGEF2,ARID2,ARX,ASH1L,ATXN1L,ATXN7L3,BAZ2B,BCORL1,BDNF,BHLHE40,BMI1,BRCA1,BRWD3,CAPRIN2,CASC3,CASK,CASZ1,CBL,CBX3,CCNL1,CCNT2,CD4,CDC73,CDK13,CDKN1B,CDON,CDYL,CHD9,CLCN3,CNEP1R1,CNOT6,CNOT6L,CPEB1,CPEB2,CREB5,CTCFL,CYLD,DACH1,DAZ1,DDX3X,DDX6,DMRT3,DNA2,DNAJB5,DNMT3A,DUSP1,EFNA1,EGLN1,EIF2C2,EIF2C3,EIF2C4,EIF4A2,EIF4E2,EIF5A2,EIF5B,…
GO.0051171	regulation of nitrogen compound metabolic process	320	5.42e-17	ACVR1,ACVR2A,ACVR2B,ADCYAP1,AFF2,AFF3,AFF4,AKAP6,ALX4,ARHGEF2,ARID2,ARX,ASH1L,ATXN1L,ATXN7L3,BAZ2B,BCORL1,BDNF,BHLHE40,BMI1,BRWD3,CAPRIN2,CASC3,CASK,CASZ1,CBL,CBX3,CCNL1,CCNT2,CDC73,CDK13,CDKN1B,CDON,CDYL,CHD9,CNOT6,CNOT6L,CPEB1,CPEB2,CREB5,CTCFL,CYLD,DACH1,DAZ1,DDX3X,DDX6,DMRT3,DNA2,DNAJB5,DNMT3A,DUSP1,EFNA1,EGLN1,EIF2C2,EIF2C3,EIF2C4,EIF4A2,EIF4E2,EIF5A2,EIF5B,ELAVL2,ELK3,ELL2,EREG,ESR1,EYA4,FA…
GO.0031326	regulation of cellular biosynthetic process	313	9.71e-17	ACVR1,ACVR2A,ACVR2B,ADCYAP1,AFF3,AFF4,AKAP6,ALX4,APOC2,ARHGEF2,ARID2,ARX,ASH1L,ATXN1L,ATXN7L3,BAZ2B,BCORL1,BDNF,BHLHE40,BMI1,BRCA1,BRWD3,CAPRIN2,CASC3,CASK,CASZ1,CBL,CBX3,CCNL1,CCNT2,CD4,CDC73,CDK13,CDKN1B,CDON,CDYL,CHD9,CNEP1R1,CNOT6,CNOT6L,CPEB1,CPEB2,CREB5,CTCFL,CYLD,DACH1,DAZ1,DDX3X,DDX6,DMRT3,DNA2,DNAJB5,DNMT3A,DUSP1,EFNA1,EGLN1,EIF2C2,EIF2C3,EIF2C4,EIF4A2,EIF4E2,EIF5A2,EIF5B,ELAVL2,ELK3,ELL…
GO.0044260	cellular macromolecule metabolic process	466	1.41e-16	A1CF,ABI1,ABI2,ABL2,ACVR1,ADAM10,ADAMTS5,AFF2,AFF3,AFF4,AGL,ALG9,ALX4,AMFR,ANAPC1,APH1B,ARID2,ARID4B,ARIH1,ARX,ATM,ATXN1,ATXN1L,ATXN7L3,B3GNT1,B4GALT5,BAG2,BAZ2B,BCORL1,BHLHE40,BMI1,BMP2K,C7orf60,CASC3,CASK,CASZ1,CBFB,CBL,CBLB,CBX3,CCNL1,CCNT2,CD4,CDC73,CDK13,CDK17,CDK19,CDYL,CHD9,CHSY3,CHTF8,CLIP3,CLPP,CNOT6,CNOT6L,CNTLN,COL4A3BP,COPS3,COPS8,CPEB1,CREB5,CREBRF,CRKL,CSNK1E,CTCFL,CTDSP2,CTDSPL2,CT…
GO.0043170	macromolecule metabolic process	496	1.95e-16	A1CF,ABI1,ABI2,ABL2,ACVR1,ADAM10,ADAMTS3,AFF2,AFF3,AFF4,AGL,ALG9,ALX4,AMFR,ANAPC1,APH1B,APOC2,ARID2,ARIH1,ARX,ATM,ATXN1,ATXN1L,ATXN7L3,B3GNT1,B4GALT5,BAG2,BAZ2B,BBC3,BCL2L11,BCORL1,BHLHE40,BMI1,BMP2K,C7orf60,CASC3,CASK,CASZ1,CBFB,CBL,CBLB,CBX3,CCNL1,CCNT2,CD4,CDC73,CDK13,CDK17,CDK19,CDKN1B,CDYL,CHD9,CHST1,CHSY3,CHTF8,CLIP3,CLPP,CNOT6,CNOT6L,CNTLN,COL4A3BP,COPS3,COPS8,CPA6,CPEB1,CREB5,CREBRF,CRKL,…
GO.0048519	negative regulation of biological process	327	1.05e-15	ABI1,ABL2,ACVR1,ACVR2B,ADAM10,ADCYAP1,ADIPOR2,AKAP6,ANAPC1,ANK3,ANKRD13C,APCDD1,APOC2,ARHGEF2,ARID4A,ARID4B,ARX,ASH1L,ASIC1,ATM,ATXN1L,BAI3,BAP1,BBC3,BHLHE40,BIRC6,BMI1,BNIP2,BPI,BRCA1,CAPRIN2,CASK,CAST,CBL,CBLB,CBX3,CDC73,CDKN1B,CDYL,CHL1,CLIC2,CLIC4,CLIP3,CNKSR3,CNOT6,CNOT6L,CNR1,COPS8,CPEB1,CPEB2,CRTAP,CSNK1E,CTDSP2,CTDSPL2,CUL5,CUX1,DACH1,DCUN1D3,DDX3X,DDX6,DGKI,DIXDC1,DLC1,DNAJA1,DNAJB5,DNAJ…
GO.0031327	negative regulation of cellular biosynthetic process	147	4.45e-15	ACVR2B,AKAP6,ARID4A,ARX,ATXN1L,BHLHE40,BMI1,BRCA1,CAPRIN2,CBX3,CDC73,CDKN1B,CDYL,CNOT6L,CPEB1,CPEB2,CREBRF,CUX1,CYLD,DACH1,DDX3X,DNAJB5,DNMT3A,DUSP1,EFNA1,EGLN1,EIF2C2,EIF2C3,EIF2C4,EIF4A2,EIF4E2,ELK3,EREG,ESR1,ETV3,FAM105B,FBXW7,FGF9,FGFR2,FMR1,FNIP2,FOXF1,FOXG1,FOXJ1,FXR1,FXR2,GABPA,GNAI3,GRM8,GSK3B,H3F3B,HIC1,HMBOX1,IGF2BP2,IGF2BP3,INSIG1,IRF1,ISL1,JAZF1,JUN,KANK2,KCNK2,KIAA1737,KLF10,KLF5,LCO…
GO.0010558	negative regulation of macromolecule biosynthetic process	142	6.87e-15	ACVR2B,ARID4A,ARX,ATXN1L,BHLHE40,BMI1,BRCA1,CAPRIN2,CBX3,CDC73,CDKN1B,CDYL,CNOT6L,CPEB1,CPEB2,CREBRF,CUX1,CYLD,DACH1,DDX3X,DNAJB5,DNMT3A,DUSP1,EFNA1,EGLN1,EIF2C2,EIF2C3,EIF2C4,EIF4A2,EIF4E2,ELK3,EREG,ESR1,ETV3,FAM105B,FBXW7,FGF9,FGFR2,FMR1,FNIP2,FOXF1,FOXG1,FOXJ1,FXR1,FXR2,GABPA,GSK3B,H3F3B,HIC1,HMBOX1,IGF2BP2,IGF2BP3,IRF1,ISL1,ITGAV,JAZF1,JUN,KANK2,KCNK2,KIAA1737,KLF10,KLF5,LCOR,LHX1,LHX9,MDFI,M…
GO.0009890	negative regulation of biosynthetic process	148	7.01e-15	ACVR2B,AKAP6,ARID4A,ARX,ATXN1L,BHLHE40,BMI1,BRCA1,CAPRIN2,CBX3,CDC73,CDKN1B,CDYL,CNOT6L,CPEB1,CPEB2,CREBRF,CUX1,CYLD,DACH1,DDX3X,DNAJB5,DNMT3A,DUSP1,EFNA1,EGLN1,EIF2C2,EIF2C3,EIF2C4,EIF4A2,EIF4E2,ELK3,EREG,ESR1,ETV3,FAM105B,FBXW7,FGF9,FGFR2,FMR1,FNIP2,FOXF1,FOXG1,FOXJ1,FXR1,FXR2,GABPA,GNAI3,GRM8,GSK3B,H3F3B,HIC1,HMBOX1,IGF2BP2,IGF2BP3,INSIG1,IRF1,ISL1,ITGAV,JAZF1,JUN,KANK2,KCNK2,KIAA1737,KLF10,KL…
GO.1903506	regulation of nucleic acid-templated transcription	271	8.51e-15	ACVR1,ACVR2A,ACVR2B,ADCYAP1,AFF3,AFF4,ALX4,ARHGEF2,ARID2,ARX,ASH1L,ATXN1L,ATXN7L3,BAZ2B,BCORL1,BDNF,BHLHE40,BMI1,BRCA1,BRWD3,CAPRIN2,CASK,CASZ1,CBL,CBX3,CCNL1,CCNT2,CDC73,CDK13,CDKN1B,CDON,CDYL,CHD9,CNOT6,CNOT6L,CREB5,CTCFL,CYLD,DACH1,DDX3X,DMRT3,DNAJB5,DNMT3A,EFNA1,EGLN1,EIF2C2,EIF4A2,ELAVL2,ELK3,ELL2,EREG,ESR1,EYA4,FAM105B,FAM48A,FBXW7,FGF9,FGFR2,FNIP2,FOXJ1,FRYL,FSBP,GABPA,GAS7,GPBP1,GSK3B,GTF…
GO.2001141	regulation of RNA biosynthetic process	272	8.51e-15	ACVR1,ACVR2A,ACVR2B,ADCYAP1,AFF3,AFF4,ALX4,ARHGEF2,ARID2,ARX,ASH1L,ATXN1L,ATXN7L3,BAZ2B,BCORL1,BDNF,BHLHE40,BMI1,BRCA1,BRWD3,CAPRIN2,CASK,CASZ1,CBL,CBX3,CCNL1,CCNT2,CDC73,CDK13,CDKN1B,CDON,CDYL,CHD9,CNOT6,CNOT6L,CREB5,CTCFL,CYLD,DACH1,DDX3X,DMRT3,DNAJB5,DNMT3A,EFNA1,EGLN1,EIF2C2,EIF4A2,ELAVL2,ELK3,ELL2,EREG,ESR1,EYA4,FAM105B,FAM48A,FBXW7,FGF9,FGFR2,FNIP2,FOXJ1,FRYL,FSBP,GABPA,GAS7,GPBP1,GSK3B,GTF…
GO.0051252	regulation of RNA metabolic process	277	1.01e-14	ACVR1,ACVR2A,ACVR2B,ADCYAP1,AFF2,AFF3,AFF4,ALX4,ARHGEF2,ARID2,ARX,ASH1L,ATXN1L,ATXN7L3,BAZ2B,BCORL1,BDNF,BHLHE40,BMI1,BRCA1,BRWD3,CAPRIN2,CASK,CASZ1,CBL,CBX3,CCNL1,CCNT2,CDC73,CDK13,CDKN1B,CDON,CDYL,CHD9,CNOT6,CNOT6L,CREB5,CTCFL,CYLD,DACH1,DDX3X,DMRT3,DNAJB5,DNMT3A,EFNA1,EGLN1,EIF2C2,EIF4A2,ELAVL2,ELK3,ELL2,EREG,ESR1,EYA4,FAM105B,FAM48A,FBXW7,FGF9,FGFR2,FNIP2,FOXJ1,FRYL,FSBP,GABPA,GAS7,GPBP1,GSK3…
GO.2000113	negative regulation of cellular macromolecule biosynthetic process	137	1.3e-14	ACVR2B,ARID4A,ARX,ATXN1L,BHLHE40,BMI1,BRCA1,CAPRIN2,CBX3,CDC73,CDKN1B,CNOT6L,CPEB1,CPEB2,CREBRF,CUX1,CYLD,DACH1,DDX3X,DNAJB5,DNMT3A,DUSP1,EFNA1,EGLN1,EIF2C2,EIF2C3,EIF2C4,EIF4E2,ELK3,EREG,ESR1,ETV3,FAM105B,FBXW7,FGF9,FGFR2,FMR1,FNIP2,FOXF1,FOXG1,FOXJ1,FXR1,FXR2,GABPA,GSK3B,H3F3B,HIC1,HMBOX1,IGF2BP2,IGF2BP3,IRF1,ISL1,JAZF1,JUN,KANK2,KCNK2,KIAA1737,KLF10,KLF5,LCOR,LHX1,LHX9,MDFI,MDM4,MEIS2,MTA3,MTD…
GO.0006351	transcription, DNA-templated	231	2.2e-14	AFF3,AFF4,ALX4,ARID2,ARID4A,ARID4B,ARX,ASH1L,ATXN1,ATXN1L,ATXN7L3,BAZ2B,BCORL1,BHLHE40,BMI1,BRCA1,CASZ1,CBFB,CBX3,CCNL1,CCNT2,CDC73,CDYL,CHD9,CNOT6,CNOT6L,COPS2,CREB5,CREBRF,CTCFL,CUX1,DACH1,DDX3X,DMRT3,E2F7,EIF2C2,ELK3,ELL2,EREG,ESR1,ETV3,EYA4,FLI1,FOSL2,FOXF1,FOXG1,FOXJ1,FOXO4,FRYL,FSBP,GABPA,GLS,GPBP1,GTF2E1,HBP1,HIC1,HIPK1,HIPK3,HIVEP2,HMBOX1,HNRNPD,HOXA5,HOXB1,IKZF1,IL16,INO80D,IRF1,IRF4,IRX…
GO.0006355	regulation of transcription, DNA-templated	269	2.48e-14	ACVR1,ACVR2A,ACVR2B,ADCYAP1,AFF3,AFF4,ALX4,ARHGEF2,ARID2,ARX,ASH1L,ATXN1L,ATXN7L3,BAZ2B,BCORL1,BDNF,BHLHE40,BMI1,BRCA1,BRWD3,CAPRIN2,CASK,CASZ1,CBL,CBX3,CCNL1,CCNT2,CDC73,CDK13,CDKN1B,CDON,CDYL,CHD9,CNOT6,CNOT6L,CREB5,CTCFL,CYLD,DACH1,DDX3X,DMRT3,DNAJB5,DNMT3A,EFNA1,EGLN1,EIF2C2,ELAVL2,ELK3,ELL2,EREG,ESR1,EYA4,FAM105B,FAM48A,FBXW7,FGF9,FGFR2,FNIP2,FOXJ1,FRYL,FSBP,GABPA,GAS7,GPBP1,GSK3B,GTF2E1,H3F…
GO.0019219	regulation of nucleobase-containing compound metabolic process	292	2.77e-14	ACVR1,ACVR2A,ACVR2B,ADCYAP1,AFF2,AFF3,AFF4,AKAP6,ALX4,ARHGEF2,ARID2,ARX,ASH1L,ATXN1L,ATXN7L3,BAZ2B,BCORL1,BDNF,BHLHE40,BMI1,BRWD3,CAPRIN2,CASK,CASZ1,CBL,CBX3,CCNL1,CCNT2,CDC73,CDK13,CDKN1B,CDON,CDYL,CHD9,CNOT6,CNOT6L,CREB5,CTCFL,CYLD,DACH1,DDX3X,DMRT3,DNA2,DNAJB5,DNMT3A,DUSP1,EFNA1,EGLN1,EIF2C2,EIF4A2,ELAVL2,ELK3,ELL2,EREG,ESR1,EYA4,FAM105B,FAM48A,FBXW7,FGF9,FGFR2,FIGN,FNIP2,FOXJ1,FRYL,FSBP,GABPA…
GO.0051172	negative regulation of nitrogen compound metabolic process	144	1.35e-13	ACVR2B,AKAP6,ARID4A,ARX,ATXN1L,BHLHE40,BMI1,BRCA1,CAPRIN2,CBX3,CDC73,CDKN1B,CDYL,CNOT6L,CPEB1,CPEB2,CREBRF,CUX1,CYLD,DACH1,DDX3X,DNAJB5,DNMT3A,DUSP1,EFNA1,EGLN1,EIF2C2,EIF2C3,EIF2C4,EIF4A2,EIF4E2,ELK3,EREG,ESR1,ETV3,FAM105B,FBXW7,FGF9,FGFR2,FMR1,FNIP2,FOXF1,FOXG1,FOXJ1,FXR1,FXR2,GABPA,GNAI3,GRM8,H3F3B,HIC1,HMBOX1,IGF2BP2,IGF2BP3,IRF1,ISL1,JAZF1,JUN,KANK2,KCNK2,KIAA1737,KLF10,KLF5,LCOR,LHX1,LHX9,M…
GO.0007399	nervous system development	182	1.46e-13	ABL2,ADAM10,ADAM23,ADCY1,ADCYAP1,AFF2,AK4,ANK3,APBA2,APCDD1,APH1B,ARHGEF2,ARX,ATM,ATP2B1,ATRN,ATXN1,ATXN10,B3GNT1,BCL2L11,BSN,BTBD3,C6orf170,CA10,CACNB2,CACNB4,CAPRIN2,CAST,CDON,CNR1,CNTNAP1,CSF1,CUL5,DDX6,DIXDC1,DLC1,DMRT3,DNMT3A,DPYSL5,DRP2,EFNB2,EML1,FARP1,FARP2,FGF9,FGFR2,FLRT3,FMR1,FOXG1,FOXJ1,GAS7,GNAQ,GPM6A,GRIN2B,GSK3B,H3F3B,HHIP,HIPK1,HOXB1,IGF1,IGLON5,IKZF1,IRX5,ISL1,ITGA5,ITGAV,ITSN2,J…
GO.0050794	regulation of cellular process	568	1.46e-13	ABI2,ABL2,ACOT11,ACVR1,ACVR2A,ACVR2B,ADAM10,ADAMTS3,ADCYAP1,AFF2,AFF3,AFF4,AKAP6,ALX4,AMFR,ANAPC1,ANK3,ANKRD13C,ANLN,APCDD1,APH1B,APLNR,APOC2,APPL1,ARFIP1,ARHGAP12,ARHGAP19,ARHGAP21,ARHGEF2,ARID2,ARIH1,ARL10,ARL5A,ARX,ASH1L,ATM,ATP1B1,ATP6V1C1,ATXN1L,ATXN7L3,BAG2,BAP1,BAZ2B,BBC3,BCL2L11,BCORL1,BDNF,BHLHE40,BMI1,BNIP2,BPI,BRCA1,BRWD3,BVES,C6orf170,CACNB2,CALB1,CAMSAP2,CAPRIN2,CASC3,CASK,CASR,CAST,…
GO.0034645	cellular macromolecule biosynthetic process	287	6.69e-13	ADAMTS5,AFF3,AFF4,AGL,ALG9,ALX4,ARID2,ARID4A,ARID4B,ARX,ASH1L,ATXN1,ATXN1L,ATXN7L3,B3GNT1,B4GALT5,BAZ2B,BCORL1,BHLHE40,BMI1,BRCA1,CASZ1,CBFB,CBX3,CCNL1,CCNT2,CD4,CDC73,CDYL,CHD9,CHSY3,CHTF8,CLIP3,CNOT6,CNOT6L,COPS2,CREB5,CREBRF,CTCFL,CUX1,DACH1,DDX3X,DMRT3,DNA2,DPY19L1,DSEL,E2F7,EDEM3,EIF2C2,EIF2S2,EIF4A2,EIF4E2,EIF5A2,EIF5B,ELK3,ELL2,EREG,ESR1,ETV3,EYA4,FLI1,FOSL2,FOXF1,FOXG1,FOXJ1,FOXO4,FRYL,FS…
GO.0009653	anatomical structure morphogenesis	186	9.95e-13	ABI1,ACVR1,ACVR2A,ACVR2B,ADAM10,ADCY1,ADIPOR2,AFF3,ALX4,ANK3,APH1B,APLNR,ARHGAP12,ARHGEF2,ARX,ATM,B3GNT1,BCL2L11,BTBD3,BVES,C6orf170,CACNB2,CACNB4,CALB1,CASR,CAST,CD109,CDC73,CDON,CFL2,CHL1,CLIC4,CNTN1,CNTNAP1,COL27A1,COL4A3BP,CRKL,CSF1,DLC1,DPYSL5,DUSP1,E2F7,EFNA1,EGLN1,ELK3,EPB41L5,EREG,ERVW-1,ESM1,ESR1,EYA4,FAM105B,FAM48A,FARP1,FARP2,FBXW7,FEM1B,FGF9,FGFR2,FLI1,FLRT3,FLT1,FOXF1,FOXJ1,FOXO4,FRM…
GO.0032774	RNA biosynthetic process	233	1.05e-12	AFF3,AFF4,ALX4,ARID2,ARID4A,ARID4B,ARX,ASH1L,ATXN1,ATXN1L,ATXN7L3,BAZ2B,BCORL1,BHLHE40,BMI1,BRCA1,CASZ1,CBFB,CBX3,CCNL1,CCNT2,CDC73,CDYL,CHD9,CNOT6,CNOT6L,COPS2,CREB5,CREBRF,CTCFL,CUX1,DACH1,DDX3X,DMRT3,E2F7,EIF2C2,ELK3,ELL2,EREG,ESR1,ETV3,EYA4,FLI1,FOSL2,FOXF1,FOXG1,FOXJ1,FOXO4,FRYL,FSBP,GABPA,GLS,GPBP1,GTF2E1,HBP1,HIC1,HIPK1,HIPK3,HIVEP2,HMBOX1,HNRNPD,HOXA5,HOXB1,IKZF1,IL16,INO80D,IRF1,IRF4,IRX…
GO.0009059	macromolecule biosynthetic process	290	1.44e-12	ADAMTS3,ADAMTS5,AFF3,AFF4,AGL,ALG9,ALX4,ARID2,ARID4A,ARID4B,ARX,ASH1L,ATXN1,ATXN1L,ATXN7L3,B3GNT1,B4GALT5,BAZ2B,BCORL1,BHLHE40,BMI1,BRCA1,CASZ1,CBFB,CBX3,CCNL1,CCNT2,CD4,CDC73,CDYL,CHD9,CHST1,CHSY3,CHTF8,CLIP3,CNOT6,CNOT6L,COPS2,CREB5,CREBRF,CTCFL,CUX1,DACH1,DDX3X,DMRT3,DNA2,DPY19L1,DSEL,E2F7,EDEM3,EIF2C2,EIF2S2,EIF4A2,EIF4E2,EIF5A2,EIF5B,ELK3,ELL2,EREG,ESR1,ETV3,EYA4,FLI1,FOSL2,FOXF1,FOXG1,FOXJ1…
GO.0010604	positive regulation of macromolecule metabolic process	220	1.44e-12	ABI1,ABL2,ACVR1,ACVR2A,ACVR2B,ADCY1,ADCYAP1,AKAP6,ALX4,ANAPC1,ANK3,ARHGEF2,ARID4A,ARID4B,ASH1L,ATXN1,ATXN7L3,BBC3,BDNF,BMI1,BRCA1,BVES,CAPRIN2,CASK,CBFB,CBLB,CCNT2,CDC73,CDKN1B,CDON,CLIP3,CNEP1R1,CNTN1,COPS8,CREB5,CREBRF,CRKL,CSF1,CSNK1E,CTCFL,CUX1,DAZ1,DDX3X,DLC1,DNA2,E2F7,EIF2C2,EIF5A2,ELK3,EPHA4,EREG,ESPL1,ESR1,FAM48A,FAM59A,FBXW7,FGF9,FGFR2,FLI1,FLT1,FNIP2,FOSL2,FOXF1,FOXJ1,FOXO4,GAB1,GABPA,G…
GO.0006464	cellular protein modification process	220	1.82e-12	ABI1,ABI2,ABL2,ACVR1,ADAM10,ADAMTS5,ALG9,AMFR,ANAPC1,ARID4A,ARID4B,ARIH1,ASH1L,ATM,ATXN7L3,B3GNT1,B4GALT5,BAP1,BMI1,BMP2K,BRCA1,CASK,CBFB,CBL,CBLB,CD4,CDC73,CDK13,CDK17,CDK19,CDYL,CLIP3,CNTLN,COL4A3BP,COPS3,COPS8,CRKL,CRTAP,CSNK1E,CTCFL,CTDSP2,CTDSPL2,CTU1,CUL5,CYLD,DCX,DPY19L1,DTX4,EDEM3,EGLN1,EIF5A2,EPHA4,EPHB2,EYA4,FAM105B,FBXO33,FBXO43,FBXW7,FEM1B,FEM1C,FGFR1OP,FGFR2,FICD,FLT1,FNIP2,GAB1,GALN…
GO.0009893	positive regulation of metabolic process	270	1.82e-12	ABI1,ABL2,ACVR1,ACVR2A,ACVR2B,ADCY1,ADCYAP1,AKAP6,ALX4,ANAPC1,ANK3,APH1B,APOC2,ARHGAP12,ARHGAP19,ARHGAP21,ARHGEF2,ARID4A,ARID4B,ASH1L,ATP1B1,ATXN1,ATXN7L3,BBC3,BDNF,BMI1,BNIP2,BRCA1,BVES,CA7,CAPRIN2,CASK,CBFB,CBLB,CCNT2,CDC73,CDKN1B,CDON,CHN2,CLCN3,CLIP3,CNEP1R1,CNTN1,COPS8,CREB5,CREBRF,CRKL,CSF1,CSNK1E,CTCFL,CUX1,DAZ1,DDX3X,DENND1B,DENND4C,DENND5B,DLC1,DNA2,DZANK1,E2F7,EIF2C2,EIF5A2,ELK3,EPHA4,E…
GO.0048522	positive regulation of cellular process	319	1.82e-12	ABI1,ABI2,ABL2,ACVR1,ACVR2A,ACVR2B,ADAM10,ADAMTS3,ADCY1,ADCYAP1,AKAP6,ALX4,ANAPC1,ANK3,APH1B,APOC2,ARHGEF2,ARID4A,ARID4B,ASH1L,ATM,ATP1B1,ATXN1,ATXN1L,ATXN7L3,BAI3,BAP1,BBC3,BCL2L11,BDNF,BIRC6,BMI1,BNIP2,BRCA1,BVES,CAPRIN2,CASK,CBFB,CBL,CCNT2,CDC73,CDK13,CDK19,CFL2,CHN2,CLCN3,CLIP1,CLIP3,CLSTN2,CNEP1R1,CNKSR3,CNOT6,CNOT6L,CNR1,CNTN1,CNTNAP1,COPS8,CREB5,CREBRF,CRKL,CSF1,CTCFL,CYLD,DAZ1,DCUN1D3,DDX…
GO.0007275	multicellular organismal development	303	5.46e-12	ABI1,ABL2,ACVR1,ACVR2A,ACVR2B,ADAM10,ADAM23,ADCY1,ADCYAP1,AFF2,AFF3,AK4,ANK3,ANLN,APH1B,APLNR,ARHGEF2,ARID4A,ARID4B,ARX,ATP2B1,ATRN,ATXN1,ATXN10,ATXN1L,B3GNT1,BBC3,BCL2L11,BIRC6,BMI1,BRCA1,BSN,BTBD3,BVES,C6orf170,CA10,CACNB2,CALB1,CAPRIN2,CAST,CASZ1,CBFB,CD109,CD4,CDC73,CDK13,CDKN1B,CDON,CNR1,CNTNAP1,COL27A1,COL4A3BP,COPS3,CRKL,CSF1,CUL5,DACH1,DAZ1,DAZ2,DAZ3,DDX6,DIAPH2,DIXDC1,DLC1,DNMT3A,DPYSL5,…
GO.0048518	positive regulation of biological process	353	6.09e-12	ABI2,ABL2,ACVR1,ACVR2A,ACVR2B,ADAM10,ADAMTS3,ADCY1,ADCYAP1,ADIPOR2,AKAP6,ALX4,ANAPC1,ANK3,APOC2,ARHGAP12,ARHGAP19,ARHGAP21,ARHGEF2,ARID4A,ARID4B,ARX,ASH1L,ATM,ATP1B1,ATXN1,ATXN1L,ATXN7L3,BAI3,BAP1,BBC3,BCL2L11,BDNF,BIRC6,BMI1,BNIP2,BRCA1,BVES,CACNB2,CACNB4,CAPRIN2,CASK,CBFB,CBL,CBLB,CCNT2,CDC73,CDK13,CDK19,CFL2,CHN2,CLCN3,CLIP1,CLIP3,CLSTN2,CNEP1R1,CNOT6,CNOT6L,CNR1,CNTN1,CNTNAP1,COPS8,CREB5,CRKL…
GO.0048856	anatomical structure development	304	6.09e-12	ABI1,ABL2,ACVR1,ACVR2A,ACVR2B,ADAM10,ADAM23,ADCY1,ADCYAP1,AFF2,AFF3,AFF4,AK4,ANK3,ANLN,APH1B,APLNR,ARHGAP12,ARID4A,ARID4B,ARX,ATP2B1,ATRN,ATXN1,ATXN10,ATXN1L,B3GNT1,BCL2L11,BIRC6,BMI1,BNIP2,BRCA1,BSN,BTBD3,BVES,C6orf170,CA10,CACNB2,CALB1,CAPRIN2,CASR,CAST,CBFB,CD109,CD4,CDC73,CDK13,CDKN1B,CFL2,CNR1,CNTNAP1,COL27A1,COL4A3BP,COPS3,CRKL,CSF1,CUL5,DDX6,DIAPH2,DIXDC1,DLC1,DMRT3,DNMT3A,DPYSL5,DRP2,DUSP…
GO.0016070	RNA metabolic process	270	1.83e-11	A1CF,AFF2,AFF3,AFF4,ALX4,ARID2,ARID4A,ARID4B,ARX,ASH1L,ATM,ATXN1,ATXN1L,ATXN7L3,BAZ2B,BCORL1,BHLHE40,BMI1,BRCA1,C7orf60,CASC3,CASZ1,CBFB,CBX3,CCNL1,CCNT2,CDC73,CDK13,CDYL,CHD9,CNOT6,CNOT6L,COPS2,CPEB1,CREB5,CREBRF,CTCFL,CTU1,CUX1,DACH1,DCP2,DDX3X,DDX6,DMRT3,DNA2,E2F7,EIF2C2,EIF2C3,EIF2C4,EIF4A2,ELAVL4,ELK3,ELL2,EREG,ESR1,ETV3,EYA4,FLI1,FOSL2,FOXF1,FOXG1,FOXJ1,FOXO4,FRYL,FSBP,GABPA,GARS,GLS,GPBP1,…
GO.0043412	macromolecule modification	225	2.38e-11	A1CF,ABI1,ABI2,ABL2,ACVR1,ADAM10,ADAMTS5,ALG9,AMFR,ANAPC1,ARID4A,ARID4B,ARIH1,ASH1L,ATM,ATXN7L3,B3GNT1,B4GALT5,BAP1,BMI1,BMP2K,BRCA1,C7orf60,CASK,CBFB,CBL,CBLB,CD4,CDC73,CDK13,CDK17,CDK19,CDYL,CLIP3,CNTLN,COL4A3BP,COPS3,COPS8,CRKL,CRTAP,CSNK1E,CTCFL,CTDSP2,CTDSPL2,CTU1,CUL5,CYLD,DCX,DPY19L1,DTX4,EDEM3,EGLN1,EIF5A2,EPHA4,EPHB2,EYA4,FAM105B,FBXO33,FBXO43,FBXW7,FEM1B,FEM1C,FGFR1OP,FGFR2,FICD,FLT1,FN…
GO.0044767	single-organism developmental process	330	2.84e-11	ABI1,ABL2,ACVR1,ACVR2A,ACVR2B,ADAM10,ADAM23,ADCY1,ADCYAP1,AFF2,AFF3,AFF4,AK4,ANK3,ANLN,APH1B,APLNR,ARHGAP12,ARID4A,ARID4B,ARX,ATM,ATP2B1,ATRN,ATXN1,ATXN10,ATXN1L,B3GNT1,BBC3,BCL2L11,BIRC6,BMI1,BNIP2,BRCA1,BSN,BTBD3,BVES,C6orf170,CA10,CACNB2,CALB1,CAPRIN2,CAST,CASZ1,CBFB,CD109,CD4,CDC73,CDK13,CDKN1B,CFL2,CLCN3,CLIP3,CNR1,CNTNAP1,COL27A1,COL4A3BP,COPS3,CRKL,CSF1,CUL5,DACH1,DAZ1,DAZ2,DAZ3,DDX6,DIAPH…
GO.0048731	system development	269	3.02e-11	ABI1,ABL2,ACVR1,ACVR2A,ACVR2B,ADAM10,ADAM23,ADCY1,ADCYAP1,AFF2,AK4,ANK3,ANLN,APBA2,APH1B,APLNR,ARHGEF2,ARID4A,ARID4B,ARX,ATP2B1,ATRN,ATXN1,ATXN10,ATXN1L,B3GNT1,BCL2L11,BIRC6,BMI1,BSN,BTBD3,BVES,C6orf170,CA10,CACNB2,CALB1,CAPRIN2,CAST,CBFB,CD109,CD4,CDK13,CDKN1B,CDON,CNR1,CNTNAP1,COL27A1,COL4A3BP,CRKL,CSF1,CUL5,DDX6,DIXDC1,DLC1,DMRT3,DNMT3A,DPYSL5,DRP2,E2F7,EFNA1,EGLN1,EIF2S2,ELK3,EPB41L5,EREG,ESM…
GO.0050789	regulation of biological process	572	3.96e-11	ABI2,ABL2,ACOT11,ACVR1,ACVR2A,ACVR2B,ADAM10,ADAMTS3,ADCYAP1,AFF2,AFF3,AFF4,AKAP6,ALX4,AMFR,ANAPC1,ANK3,ANKRD13C,ANLN,APBA2,APCDD1,APLNR,APOC2,APPL1,ARFIP1,ARHGAP12,ARHGAP19,ARHGEF2,ARID2,ARIH1,ARL10,ARL5A,ARX,ASH1L,ATM,ATP1B1,ATP6V1C1,ATRN,ATXN1L,ATXN7L3,BAG2,BAP1,BAZ2B,BBC3,BCL2L11,BCORL1,BDNF,BHLHE40,BMI1,BMP2K,BNIP2,BPI,BRCA1,BRWD3,BVES,C6orf170,CACNB2,CALB1,CAMSAP2,CAPRIN2,CASC3,CASK,CASR,CAS…
GO.0031325	positive regulation of cellular metabolic process	225	4.22e-11	ABI1,ABL2,ACVR1,ACVR2A,ACVR2B,ADCY1,ADCYAP1,AKAP6,ALX4,ANAPC1,APOC2,ARHGEF2,ARID4A,ARID4B,ASH1L,ATP1B1,ATXN1,ATXN7L3,BBC3,BDNF,BMI1,BRCA1,BVES,CA7,CAPRIN2,CASK,CBFB,CCNT2,CDC73,CDKN1B,CDON,CLCN3,CLIP3,CNEP1R1,COPS8,CREB5,CRKL,CSF1,CSNK1E,CTCFL,CUX1,DAZ1,DDX3X,DLC1,DNA2,DZANK1,E2F7,EIF2C2,EIF5A2,ELK3,EPHA4,EREG,ESPL1,ESR1,FAM48A,FAM59A,FBXW7,FGF9,FGFR2,FLI1,FLT1,FNIP2,FOSL2,FOXF1,FOXJ1,FOXO4,GAB1,…
GO.0032502	developmental process	331	4.56e-11	ABI1,ABL2,ACVR1,ACVR2A,ACVR2B,ADAM10,ADAM23,ADCY1,ADCYAP1,AFF2,AFF3,AFF4,AK4,ANK3,ANLN,APH1B,APLNR,ARHGAP12,ARID4A,ARID4B,ARX,ATM,ATP2B1,ATRN,ATXN1,ATXN10,ATXN1L,B3GNT1,BBC3,BCL2L11,BIRC6,BMI1,BNIP2,BRCA1,BSN,BTBD3,BVES,C6orf170,CA10,CACNB2,CALB1,CAPRIN2,CASR,CAST,CASZ1,CBFB,CD109,CD4,CDC73,CDK13,CDKN1B,CFL2,CLCN3,CLIP3,CNR1,CNTNAP1,COL27A1,COL4A3BP,COPS3,CRKL,CSF1,CUL5,DACH1,DAZ1,DAZ2,DAZ3,DDX6,…
GO.0010467	gene expression	295	4.97e-11	A1CF,ADAMTS3,AFF2,AFF3,AFF4,ALX4,APH1B,ARID2,ARID4A,ARID4B,ARX,ASH1L,ATXN1,ATXN1L,ATXN7L3,BAZ2B,BBC3,BCL2L11,BCORL1,BHLHE40,BMI1,BRCA1,C7orf60,CASC3,CASZ1,CBFB,CBX3,CCNL1,CCNT2,CDC73,CDK13,CDKN1B,CDYL,CHD9,CNOT6,CNOT6L,COPS2,CPEB1,CREB5,CREBRF,CTCFL,CTU1,CUX1,DACH1,DCP2,DDX3X,DDX6,DLC1,DMRT3,DNMT3A,E2F7,EIF2C2,EIF2C3,EIF2C4,EIF2S2,EIF4A2,EIF4E2,EIF5A2,EIF5B,ELAVL4,ELK3,ELL2,EREG,ESR1,ETV3,EYA4,FL…
GO.0034654	nucleobase-containing compound biosynthetic process	244	4.97e-11	ADCY1,AFF3,AFF4,AK4,ALX4,ARID2,ARID4A,ARID4B,ARX,ASH1L,ATXN1,ATXN1L,ATXN7L3,BAZ2B,BCORL1,BHLHE40,BMI1,BRCA1,CASZ1,CBFB,CBX3,CCNL1,CCNT2,CDC73,CDYL,CHD9,CNOT6,CNOT6L,COPS2,CREB5,CREBRF,CTCFL,CUX1,DACH1,DDX3X,DMRT3,E2F7,EIF2C2,ELK3,ELL2,EREG,ESR1,ETV3,EYA4,FLI1,FOSL2,FOXF1,FOXG1,FOXJ1,FOXO4,FRYL,FSBP,GABPA,GARS,GLS,GMPS,GPBP1,GTF2E1,GUCY1A2,HBP1,HIC1,HIPK1,HIPK3,HIVEP2,HMBOX1,HNRNPD,HOXA5,HOXB1,IKZ…
GO.0010629	negative regulation of gene expression	136	7.25e-11	ACVR2B,ARID4A,ARID4B,ARX,ATXN1L,BHLHE40,BMI1,BRCA1,CAPRIN2,CBX3,CDC73,CDKN1B,CNOT6,CNOT6L,CPEB1,CPEB2,CREBRF,CUX1,CYLD,DACH1,DDX3X,DNAJB5,EFNA1,EGLN1,EIF2C2,EIF2C3,EIF2C4,EIF4E2,ELK3,EREG,ESR1,ETV3,FAM105B,FGF9,FGFR2,FMR1,FNIP2,FOXF1,FOXG1,FOXJ1,FXR1,FXR2,GABPA,H3F3B,HIC1,HMBOX1,IGF2BP2,IGF2BP3,IRF1,ISL1,JAZF1,JUN,KANK2,KIAA1737,KLF10,KLF5,LCOR,LHX1,LHX9,LIN28B,MDFI,MDM4,MEIS2,MTA3,MTDH,MTF2,NAB1…
GO.0048468	cell development	148	8.15e-11	ABI1,ACVR1,ADAM10,ADCY1,ADCYAP1,AFF4,ANK3,APH1B,ARID4A,ARID4B,ARX,ATM,ATXN10,B3GNT1,BCL2L11,BTBD3,BVES,CACNB2,CBFB,CDC73,CFL2,CLIC4,CNR1,CNTN1,CNTNAP1,COL27A1,DDX6,DIAPH2,DPYSL5,EFNA1,EFNB2,ENAH,EPB41L5,EPHA4,EREG,ESR1,FAM9C,FARP1,FARP2,FEM1B,FLI1,FLRT3,FOXJ1,FRMD6,FZD3,GAS7,GJC1,GNAQ,GOPC,GPM6A,GRIN2B,GSK3B,HOOK1,HOXA5,IGF1,IRX5,ISL1,ITGA5,ITGAV,JUN,KCNJ10,KDR,KITLG,KLF10,KLF5,LDB2,LHX1,LHX9,LMX…
GO.0018130	heterocycle biosynthetic process	246	1.3e-10	ADCY1,AFF3,AFF4,AK4,ALDH4A1,ALX4,ARID2,ARID4A,ARID4B,ARX,ASH1L,ATXN1,ATXN1L,ATXN7L3,BAZ2B,BCORL1,BHLHE40,BMI1,BRCA1,CASZ1,CBFB,CBX3,CCNL1,CCNT2,CDC73,CDYL,CHD9,CNOT6,CNOT6L,COPS2,CREB5,CREBRF,CTCFL,CUX1,DACH1,DDX3X,DMRT3,E2F7,EIF2C2,ELK3,ELL2,EREG,ESR1,ETV3,EYA4,FLI1,FOSL2,FOXF1,FOXG1,FOXJ1,FOXO4,FRYL,FSBP,GABPA,GARS,GLS,GMPS,GPBP1,GTF2E1,GUCY1A2,HBP1,HIC1,HIPK1,HIPK3,HIVEP2,HMBOX1,HNRNPD,HOXA5,H…
GO.0051246	regulation of protein metabolic process	199	1.3e-10	ABI1,ABL2,ACVR1,ACVR2A,ACVR2B,ADCY1,ADCYAP1,AKAP6,ANAPC1,ARHGEF2,ASH1L,ATM,BBC3,BDNF,BIRC6,BMI1,BRCA1,CAPRIN2,CASC3,CBLB,CCNL1,CCNT2,CCNYL1,CD109,CDON,CLIP3,CNEP1R1,CNKSR3,CNOT6,CNOT6L,COPS8,CPEB1,CPEB2,CREBRF,CRKL,CRTAP,CSF1,CSNK1E,CTCFL,CTDSP2,DAZ1,DDX3X,DDX6,DIXDC1,DLC1,DNAJA1,DNAJC3,EIF2C2,EIF2C3,EIF2C4,EIF4A2,EIF4E2,EIF5A2,EIF5B,EPHA4,EREG,ESPL1,FAM59A,FARP1,FBXO43,FBXW7,FEM1B,FGF9,FGFR1OP,F…
GO.0031324	negative regulation of cellular metabolic process	187	1.69e-10	ACVR2B,AKAP6,ANAPC1,ARID4A,ARX,ASH1L,ATM,ATXN1L,BHLHE40,BIRC6,BMI1,BRCA1,CAPRIN2,CBX3,CD109,CDC73,CDKN1B,CDYL,CNKSR3,CNOT6L,CNR1,CPEB1,CPEB2,CREBRF,CRTAP,CTDSP2,CUX1,CYLD,DACH1,DDX3X,DNAJA1,DNAJB5,DNAJC3,DNMT3A,EFNA1,EGLN1,EIF2C2,EIF2C3,EIF2C4,EIF4A2,EIF4E2,ELK3,EREG,ESR1,ETV3,FAM105B,FARP1,FBXW7,FGF9,FGFR1OP,FGFR2,FMR1,FNIP2,FOXF1,FOXG1,FOXJ1,FXR1,FXR2,GABPA,GNAI3,GNAQ,GRM8,GSK3B,H3F3B,HERPUD1,H…
GO.0019438	aromatic compound biosynthetic process	245	2.85e-10	ADCY1,AFF3,AFF4,AK4,ALX4,ARID2,ARID4A,ARID4B,ARX,ASH1L,ATXN1,ATXN1L,ATXN7L3,BAZ2B,BCORL1,BHLHE40,BMI1,BRCA1,CASZ1,CBFB,CBX3,CCNL1,CCNT2,CDC73,CDYL,CHD9,CNOT6,CNOT6L,COPS2,CREB5,CREBRF,CTCFL,CUX1,DACH1,DDX3X,DMRT3,E2F7,EIF2C2,ELK3,ELL2,EREG,ESR1,ETV3,EYA4,FLI1,FOSL2,FOXF1,FOXG1,FOXJ1,FOXO4,FRYL,FSBP,GABPA,GARS,GLS,GMPS,GPBP1,GTF2E1,GUCY1A2,HBP1,HIC1,HIPK1,HIPK3,HIVEP2,HMBOX1,HNRNPD,HOXA5,HOXB1,IKZ…
GO.0006357	regulation of transcription from RNA polymerase II promoter	150	2.86e-10	ACVR1,ACVR2A,ACVR2B,ADCYAP1,ALX4,ARHGEF2,ARX,ASH1L,ATXN1,ATXN1L,BHLHE40,BMI1,BRCA1,BRWD3,CAPRIN2,CASK,CBFB,CCNT2,CDC73,CDK13,CDON,CREBRF,CTCFL,DACH1,DDX3X,DNAJB5,DNMT3A,EFNA1,EGLN1,EIF2C2,ELK3,ESR1,FAM48A,FGF9,FGFR2,FNIP2,FOSL2,FOXJ1,FOXO4,GABPA,GSK3B,HIC1,HOXA5,HOXB1,IGF1,IKZF1,INSIG1,IRF1,IRF4,ISL1,JARID2,JAZF1,JUN,KANK2,KLF10,KLF6,KLF9,LCOR,LDB2,MAML2,MDFI,MDM4,MECP2,MED12L,MED13,MEIS2,MEOX2,M…
GO.0044237	cellular metabolic process	517	4.21e-10	A1CF,ABI1,ABI2,ABL2,ACOT11,ACVR1,ACYP2,ADAM10,ADAMTS5,ADCY1,ADIPOR2,AFF2,AFF3,AFF4,AGL,AK4,ALDH4A1,ALG9,ALX4,AMFR,ANAPC1,APH1B,APOC2,ARID2,ARID4B,ARIH1,ARX,ATM,ATXN1,ATXN1L,ATXN7L3,B3GNT1,B4GALT5,BAG2,BAZ2B,BCORL1,BDNF,BHLHE40,BMI1,BMP2K,C7orf60,CA7,CACNB4,CASC3,CASK,CASZ1,CBFB,CBL,CBLB,CBX3,CCNL1,CCNT2,CD4,CDC73,CDK13,CDK17,CDK19,CDS1,CDYL,CERS6,CHD9,CHST1,CHSY3,CHTF8,CLIP3,CLPP,CNOT6,CNOT6L,CNT…
GO.1902679	negative regulation of RNA biosynthetic process	115	4.21e-10	ACVR2B,ARID4A,ARX,ATXN1L,BHLHE40,BMI1,BRCA1,CBX3,CDC73,CDKN1B,CDYL,CREBRF,CUX1,CYLD,DACH1,DNAJB5,DNMT3A,EFNA1,EGLN1,EIF4A2,ELK3,EREG,ESR1,ETV3,FAM105B,FGF9,FGFR2,FNIP2,FOXF1,FOXG1,FOXJ1,GABPA,H3F3B,HIC1,HMBOX1,IRF1,ISL1,JAZF1,JUN,KANK2,KIAA1737,KLF10,KLF5,LCOR,LHX1,LHX9,MDFI,MDM4,MEIS2,MTA3,MTDH,MTF2,NAB1,NACA,NCOA1,NEDD4,NFIA,NFX1,NKX3-1,NLRC5,NOG,NOTCH1,NPAT,NR1D2,NR2F2,NRIP2,PAX5,PHB,PHF14,POU…
GO.1903507	negative regulation of nucleic acid-templated transcription	114	4.21e-10	ACVR2B,ARID4A,ARX,ATXN1L,BHLHE40,BMI1,BRCA1,CBX3,CDC73,CDKN1B,CDYL,CREBRF,CUX1,CYLD,DACH1,DNAJB5,DNMT3A,EFNA1,EGLN1,EIF4A2,ELK3,EREG,ESR1,ETV3,FAM105B,FGF9,FGFR2,FNIP2,FOXF1,FOXG1,FOXJ1,GABPA,H3F3B,HIC1,HMBOX1,IRF1,ISL1,JAZF1,JUN,KANK2,KIAA1737,KLF10,KLF5,LCOR,LHX1,LHX9,MDFI,MDM4,MEIS2,MTA3,MTDH,MTF2,NAB1,NACA,NCOA1,NEDD4,NFIA,NFX1,NKX3-1,NLRC5,NOG,NOTCH1,NPAT,NR1D2,NR2F2,NRIP2,PAX5,PHB,PHF14,POU…
GO.0030154	cell differentiation	237	4.77e-10	ABI1,ABL2,ACVR1,ACVR2B,ADAM10,ADCY1,ADCYAP1,AFF4,ANK3,ANLN,APCDD1,APH1B,ARHGEF2,ARID4A,ARID4B,ARX,ATXN1,ATXN10,B3GNT1,BCL2L11,BNIP2,BTBD3,BVES,CACNB2,CAPRIN2,CAST,CBFB,CD109,CD4,CDC73,CFL2,CLIP3,CNR1,CNTNAP1,COL27A1,CSF1,DAZ1,DAZ2,DAZ3,DDX6,DIAPH2,DIXDC1,DMRT3,DNMT3A,DPYSL5,E2F7,EFNA1,EFNB2,ELK3,ENAH,EPB41L5,EREG,ESR1,ETV3,FAM9C,FARP1,FARP2,FBXW7,FEM1B,FGF9,FLRT3,FLT1,FOXJ1,FOXO4,FRMD6,FRZB,FXR1,…
GO.0032268	regulation of cellular protein metabolic process	187	4.92e-10	ABI1,ABL2,ACVR1,ACVR2A,ACVR2B,ADCY1,ADCYAP1,AKAP6,ANAPC1,ARHGEF2,ASH1L,ATM,BBC3,BDNF,BIRC6,BMI1,BRCA1,CAPRIN2,CASC3,CCNL1,CCNT2,CCNYL1,CD109,CDON,CLIP3,CNEP1R1,CNKSR3,CNOT6,CNOT6L,COPS8,CPEB1,CPEB2,CRKL,CRTAP,CSF1,CSNK1E,CTCFL,CTDSP2,DAZ1,DDX3X,DDX6,DIXDC1,DLC1,DNAJA1,DNAJC3,EIF2C2,EIF2C3,EIF2C4,EIF4A2,EIF4E2,EIF5A2,EIF5B,EPHA4,EREG,ESPL1,FAM59A,FARP1,FBXW7,FEM1B,FGF9,FGFR1OP,FGFR2,FLT1,FMR1,FNIP…
GO.0065007	biological regulation	581	6.57e-10	A1CF,ABI2,ABL2,ACOT11,ACVR1,ACVR2A,ACVR2B,ADAM10,ADAMTS3,ADCYAP1,AFF2,AFF3,AFF4,AKAP6,ALX4,AMFR,ANAPC1,ANK3,ANKRD13C,ANLN,APBA2,APCDD1,APOC2,APPL1,ARFIP1,ARHGAP12,ARHGAP19,ARHGAP21,ARHGEF2,ARID2,ARIH1,ARL10,ARL5A,ARX,ASH1L,ATM,ATP13A4,ATP1B1,ATP2B1,ATP6V1C1,ATRN,ATXN1L,ATXN7L3,BAG2,BAP1,BAZ2B,BBC3,BCL2L11,BCORL1,BDNF,BHLHE40,BMI1,BMP2K,BNIP2,BPI,BRCA1,BRWD3,BVES,C6orf170,CACNB2,CALB1,CAMSAP2,CAPR…
GO.0022008	neurogenesis	131	6.83e-10	ABL2,ADAM10,ADCY1,ADCYAP1,ANK3,APCDD1,APH1B,ARHGEF2,ARX,ATXN1,ATXN10,B3GNT1,BTBD3,CACNB2,CACNB4,CAPRIN2,CDON,CNR1,CNTNAP1,CSF1,DDX6,DIXDC1,DMRT3,DNMT3A,DPYSL5,EFNB2,EML1,ENAH,FARP1,FARP2,FGFR2,FLRT3,GAS7,GNAQ,GPM6A,GRIN2B,HHIP,HIPK1,IGF1,IGLON5,IRX5,ISL1,ITGA5,ITGAV,ITSN2,JUN,KCNJ10,KIT,LHX1,LHX9,LMX1A,LMX1B,LPPR4,MACF1,MAGI2,MAP1B,MAP2,MAPK8IP3,MECP2,MET,MMD,MYCN,NAB1,NCAN,NCDN,NCOA1,NEDD4,NGRN,…
GO.0071704	organic substance metabolic process	532	7.56e-10	A1CF,ABI1,ABI2,ABL2,ACOT11,ACVR1,ADAM10,ADAMTS3,ADCY1,ADIPOR2,AFF2,AFF3,AFF4,AGL,AK4,ALDH4A1,ALG9,ALX4,AMFR,ANAPC1,APH1B,APOC2,ARID2,ARIH1,ARX,ATM,ATXN1,ATXN1L,ATXN7L3,B3GNT1,B4GALT5,BAG2,BAZ2B,BBC3,BCL2L11,BCORL1,BDNF,BHLHE40,BMI1,BMP2K,C7orf60,CACNB4,CASC3,CASK,CASZ1,CBFB,CBL,CBLB,CBX3,CCNL1,CCNT2,CD4,CDC73,CDK13,CDK17,CDK19,CDKN1B,CDS1,CDYL,CERS6,CHD9,CHST1,CHSY3,CHTF8,CLIP3,CLPP,CNEP1R1,CNOT6…
GO.0048812	neuron projection morphogenesis	69	8.91e-10	ADAM10,ADCY1,ANK3,APH1B,ARX,B3GNT1,BTBD3,CACNB2,CACNB4,CHL1,CNTN1,CNTNAP1,DPYSL5,EFNA1,EFNB2,ENAH,EPHA4,FARP1,FARP2,FGFR2,FLRT3,FZD3,GAS7,GPM6A,GRIN2B,GSK3B,ISL1,ITGA5,ITGAV,KCNQ3,LHX1,LHX9,LMX1A,LPPR4,MAP1B,MAP2,MAPK8IP3,MET,NCAN,NDEL1,NGFR,NOG,NOTCH1,NPTX1,NR4A3,NRK,NRP2,OTX2,PACSIN1,PLXNC1,RAF1,RANBP9,RASA1,RBFOX2,RELN,ROBO2,RPS6KA1,SLC9A6,SLIT2,SLITRK1,SNAP25,SOS1,SOS2,SPTBN1,TNR,TOP2B,ULK2,W…
GO.0044238	primary metabolic process	521	1.01e-09	A1CF,ABI1,ABI2,ABL2,ACOT11,ACVR1,ADAM10,ADAMTS3,ADCY1,ADIPOR2,AFF2,AFF3,AFF4,AGL,AK4,ALDH4A1,ALG9,ALX4,AMFR,ANAPC1,APH1B,APOC2,ARID2,ARID4B,ARIH1,ARX,ATM,ATXN1,ATXN1L,ATXN7L3,B3GNT1,B4GALT5,BAG2,BAZ2B,BBC3,BCL2L11,BCORL1,BDNF,BHLHE40,BMI1,BMP2K,C7orf60,CACNB4,CASC3,CASK,CASZ1,CBFB,CBL,CBLB,CBX3,CCNL1,CCNT2,CD4,CDC73,CDK13,CDK17,CDK19,CDKN1B,CDS1,CDYL,CERS6,CHD9,CHST1,CHSY3,CHTF8,CLIP3,CLPP,CNEP1R…
GO.0031175	neuron projection development	78	1.1e-09	ADAM10,ADCY1,ADCYAP1,ANK3,APH1B,ARX,ATXN10,B3GNT1,BTBD3,CACNB2,CACNB4,CNR1,CNTN1,CNTNAP1,DPYSL5,EFNA1,EFNB2,ENAH,EPHA4,FARP1,FARP2,FGFR2,FLRT3,FZD3,GAS7,GPM6A,GRIN2B,GSK3B,ISL1,ITGA5,ITGAV,JUN,KCNQ3,LHX1,LHX9,LMX1A,LPPR4,MAP1B,MAP2,MAPK8IP3,MECP2,MET,NCAN,NCDN,NDEL1,NEDD4,NGFR,NOG,NOTCH1,NPTX1,NR4A3,NRK,NRP2,OTX2,PACSIN1,PLXNC1,PPP1R9A,PRKG1,RAF1,RANBP9,RAPGEF2,RASA1,RBFOX2,ROBO2,RPS6KA1,SLIT2,SL…
GO.0045944	positive regulation of transcription from RNA polymerase II promoter	103	1.16e-09	ACVR1,ACVR2A,ADCYAP1,ALX4,ARHGEF2,ARID4A,ARID4B,ASH1L,ATXN1,BRCA1,CAPRIN2,CASK,CBFB,CCNT2,CDC73,CDON,CTCFL,CUX1,DDX3X,E2F7,EIF2C2,ELK3,ESR1,FAM48A,FGFR2,FLI1,FOXF1,FOXJ1,GABPA,GSK3B,HOXA5,HOXB1,IGF1,IKZF1,INSIG1,IRF1,IRF4,ISL1,JUN,KLF5,KLF6,LDB2,MAML2,MAPK14,MED12L,MED13,MEIS2,MEOX2,MET,MKL1,MKL2,MLLT10,MTF2,MYBL1,MYCN,NACA,NAMPT,NCOA1,NFAT5,NFIA,NFYA,NKX3-1,NLRC5,NOG,NOTCH1,NPAS4,NPNT,NR4A3,NR5A…
GO.1901362	organic cyclic compound biosynthetic process	249	1.16e-09	ADCY1,AFF3,AFF4,AK4,ALDH4A1,ALX4,ARID2,ARID4A,ARID4B,ARX,ASH1L,ATXN1,ATXN1L,ATXN7L3,BAZ2B,BCORL1,BHLHE40,BMI1,BRCA1,CASZ1,CBFB,CBX3,CCNL1,CCNT2,CDC73,CDYL,CHD9,CNOT6,CNOT6L,COPS2,CREB5,CREBRF,CTCFL,CUX1,CYP39A1,DACH1,DDX3X,DMRT3,E2F7,EIF2C2,ELK3,ELL2,EREG,ESR1,ETV3,EYA4,FLI1,FOSL2,FOXF1,FOXG1,FOXJ1,FOXO4,FRYL,FSBP,GABPA,GARS,GLS,GMPS,GPBP1,GTF2E1,GUCY1A2,HBP1,HIC1,HIPK1,HIPK3,HIVEP2,HMBOX1,HNRNPD…
GO.0007409	axonogenesis	64	1.34e-09	ABL2,ADAM10,ADCY1,ANK3,APH1B,ARX,B3GNT1,BDNF,CACNB2,CACNB4,CHL1,CNTN1,CNTNAP1,DPYSL5,EFNA1,EFNB2,ENAH,EPHA4,FARP2,FGFR2,FLRT3,FZD3,GRIN2B,GSK3B,ISL1,ITGA5,ITGAV,KCNQ3,LHX1,LHX9,LMX1A,LPPR4,MAP1B,MAP2,MAPK8IP3,MET,NCAN,NDEL1,NGFR,NOG,NOTCH1,NPTX1,NR4A3,NRP2,OTX2,PLXNC1,RAF1,RANBP9,RASA1,RELN,ROBO2,RPS6KA1,SLC9A6,SLIT2,SLITRK1,SNAP25,SOS1,SOS2,SPTBN1,TNR,TOP2B,ULK2,WASL,YWHAB
GO.0048699	generation of neurons	125	1.43e-09	ABL2,ADAM10,ADCY1,ADCYAP1,ANK3,APH1B,ARHGEF2,ARX,ATXN1,ATXN10,B3GNT1,BTBD3,CACNB2,CACNB4,CAPRIN2,CDON,CNR1,CNTNAP1,CSF1,DDX6,DIXDC1,DMRT3,DNMT3A,DPYSL5,EFNB2,EML1,ENAH,FARP1,FARP2,FGFR2,FLRT3,GAS7,GNAQ,GPM6A,GRIN2B,HHIP,HIPK1,IGLON5,IRX5,ISL1,ITGA5,ITGAV,ITSN2,JUN,KCNQ3,KIT,LHX1,LHX9,LMX1A,LMX1B,LPPR4,MACF1,MAGI2,MAP1B,MAP2,MAPK8IP3,MECP2,MET,MMD,MYCN,NCAN,NCDN,NCOA1,NEDD4,NGRN,NLGN4X,NPTN,NPTX1,…
GO.0090304	nucleic acid metabolic process	288	1.47e-09	A1CF,AFF2,AFF3,AFF4,ALX4,ARID2,ARID4A,ARID4B,ARX,ASH1L,ATXN1,ATXN1L,ATXN7L3,BAZ2B,BCORL1,BHLHE40,BMI1,C7orf60,CASC3,CASZ1,CBFB,CBX3,CCNL1,CCNT2,CDC73,CDK13,CDYL,CHD9,CHTF8,CNOT6,CNOT6L,COPS2,CPEB1,CREB5,CREBRF,CSNK1E,CTCFL,CTU1,CUX1,DACH1,DCP2,DDX3X,DDX6,DMRT3,DNA2,E2F7,EIF2C2,EIF2C3,EIF2C4,EIF4A2,ELAVL4,ELK3,ELL2,EREG,ESR1,ETV3,EYA4,FLI1,FOSL2,FOXF1,FOXG1,FOXJ1,FOXO4,FRYL,FSBP,GABPA,GARS,GLS,GPB…
GO.2000026	regulation of multicellular organismal development	138	1.89e-09	ABL2,ACVR1,ACVR2A,ACVR2B,AKAP6,ARHGEF2,ATXN1,ATXN1L,BAI3,BDNF,BMP2K,BRCA1,CAPRIN2,CBLB,CD109,CDC73,CDKN1B,CDON,CLSTN2,CNR1,CNTN1,CSF1,CUX1,CYLD,DDX6,DIXDC1,DMRT3,EFNA1,EFNB2,EGLN1,EPB41L5,ESR1,FBXW7,FGF9,FGFR2,FLRT3,FLT1,FOXJ1,FOXO4,FRZB,FZD3,GABPA,GCNT2,GNAQ,HIPK1,IGF1,IGLON5,IKZF1,IRF1,IRF4,ISL1,ITSN2,JUN,KCNK2,KIT,KITLG,KLF10,LHX1,LMX1A,LRRTM3,MACF1,MAGI2,MAP1B,MAPK14,MECP2,MEIS2,MET,MIA3,MKL1…
GO.0051128	regulation of cellular component organization	177	1.96e-09	ABI2,ABL2,ADAM10,ADIPOR2,AKAP6,ANAPC1,ANLN,APOC2,APPL1,ARFIP1,ARHGAP21,ARHGEF2,ATM,ATP1B1,BAI3,BAP1,BBC3,BCL2L11,BDNF,BRCA1,BRWD3,BVES,CA7,CAMSAP2,CAPRIN2,CBL,CDK13,CDKN1B,CFL2,CLIC4,CLIP1,CLIP3,CLSTN2,CNOT6,CNOT6L,CNR1,CNTN1,CSNK1E,CTCFL,CUX1,CYLD,DCUN1D3,DDX3X,DIXDC1,DLC1,DPP10,DZANK1,EFNA1,EIF5A2,EPB41L5,EREG,ESM1,ESPL1,FAM115A,FARP2,FBXO43,FBXW7,FGFR1OP,FGFR2,FLRT3,FRZB,GAS7,GCNT2,GOPC,GPM6A,…
GO.0048667	cell morphogenesis involved in neuron differentiation	67	2.05e-09	ADAM10,ADCY1,ANK3,APH1B,ARX,B3GNT1,BDNF,BTBD3,CACNB2,CACNB4,CHL1,CNTN1,CNTNAP1,DPYSL5,EFNA1,EFNB2,ENAH,EPHA4,FARP1,FARP2,FGFR2,FLRT3,FZD3,GRIN2B,GSK3B,ISL1,ITGA5,ITGAV,KCNQ3,LHX1,LHX9,LMX1A,LPPR4,MAP1B,MAP2,MAPK8IP3,MET,NCAN,NDEL1,NGFR,NOG,NOTCH1,NPTX1,NR4A3,NRP2,OTX2,PLXNC1,RAF1,RANBP9,RASA1,RBFOX2,RELN,ROBO2,RPS6KA1,SLC9A6,SLIT2,SLITRK1,SNAP25,SOS1,SOS2,SPR,SPTBN1,TNR,TOP2B,ULK2,WASL,YWHAB
GO.0050793	regulation of developmental process	173	2.05e-09	ABL2,ACVR1,ACVR2A,ACVR2B,AKAP6,ARHGEF2,ARX,ATRN,ATXN1,ATXN1L,BAI3,BCL2L11,BDNF,BMP2K,BNIP2,BRCA1,BRWD3,BVES,CAPRIN2,CBLB,CD109,CDC73,CDKN1B,CLSTN2,CNR1,CNTN1,CSF1,CSNK1E,CUX1,DDX6,DIXDC1,DLC1,DMRT3,EFNA1,EFNB2,EGLN1,EPB41L5,EREG,ESR1,FBXW7,FGF9,FGFR2,FLRT3,FLT1,FOXF1,FOXJ1,FOXO4,FZD3,GABPA,GAS7,GCNT2,GNAQ,GPAM,HIPK1,IGF1,IGLON5,IKZF1,INSIG1,IRF1,IRF4,ISL1,ITGAV,ITSN2,KCNK2,KDR,KITLG,KLF10,KLF5,LD…
GO.0009892	negative regulation of metabolic process	198	2.17e-09	ACVR2B,AKAP6,ANAPC1,APOC2,ARID4A,ARID4B,ARX,ASH1L,ATM,ATXN1L,BHLHE40,BIRC6,BMI1,BRCA1,CABP1,CAPRIN2,CBX3,CD109,CDC73,CDKN1B,CDYL,CNKSR3,CNOT6,CNOT6L,CNR1,CPEB1,CPEB2,CREBRF,CRTAP,CTDSP2,CUX1,CYLD,DACH1,DDX3X,DGKI,DNAJA1,DNAJB5,DNAJC3,EFNA1,EGLN1,EIF2C2,EIF2C3,EIF2C4,EIF4A2,EIF4E2,ELK3,EREG,ESR1,ETV3,FAM105B,FARP1,FBXO43,FBXW7,FGF9,FGFR1OP,FGFR2,FICD,FMR1,FNIP2,FOXF1,FOXG1,FOXJ1,FXR1,FXR2,GABPA,GN…
GO.0061564	axon development	65	2.3e-09	ABL2,ADAM10,ADCY1,ANK3,APH1B,ARX,B3GNT1,BDNF,CACNB2,CACNB4,CNR1,CNTN1,CNTNAP1,DPYSL5,EFNA1,EFNB2,ENAH,EPHA4,FARP2,FGFR2,FLRT3,FZD3,GRIN2B,GSK3B,ISL1,ITGA5,ITGAV,JUN,KCNQ3,LHX1,LHX9,LMX1A,LPPR4,MAP1B,MAP2,MAPK8IP3,MET,NCAN,NDEL1,NGFR,NOG,NOTCH1,NPTX1,NR4A3,NRP2,OTX2,PLXNC1,RAF1,RANBP9,RASA1,RELN,ROBO2,RPS6KA1,SLC9A6,SLIT2,SLITRK1,SNAP25,SOS1,SOS2,SPTBN1,TNR,TOP2B,ULK2,WASL,YWHAB
GO.0010605	negative regulation of macromolecule metabolic process	181	2.59e-09	ACVR2B,ANAPC1,ARID4A,ARID4B,ARX,ASH1L,ATM,ATXN1L,BHLHE40,BIRC6,BMI1,BRCA1,CAPRIN2,CBX3,CD109,CDC73,CDYL,CNKSR3,CNOT6,CNOT6L,CPEB1,CPEB2,CREBRF,CRTAP,CTDSP2,CUX1,CYLD,DACH1,DDX3X,DNAJA1,DNAJB5,DNAJC3,EFNA1,EGLN1,EIF2C2,EIF2C3,EIF2C4,EIF4A2,EIF4E2,ELK3,EREG,ESR1,ETV3,FAM105B,FARP1,FBXO43,FBXW7,FGF9,FGFR1OP,FGFR2,FMR1,FNIP2,FOXF1,FOXG1,FOXJ1,FXR1,FXR2,GABPA,GNAQ,GSK3B,H3F3B,HERPUD1,HIC1,HIPK3,HMBOX1…
GO.0023051	regulation of signaling	210	2.62e-09	ABL2,ACVR1,ACVR2A,ACVR2B,ADAMTS3,ADCYAP1,AKAP6,APCDD1,ARHGAP12,ARHGAP19,ARHGEF2,ASH1L,ASIC1,ATM,ATXN1,BBC3,BCL2L11,BDNF,BIRC6,BRCA1,BVES,CA7,CALB1,CAPRIN2,CBL,CBLB,CD109,CD4,CDC73,CDON,CHN2,CLSTN2,CNKSR3,CNR1,CNTNAP1,COPS8,CRKL,CSF1,CSNK1E,CTDSPL2,CYLD,DDX3X,DGKI,DLC1,DNAJA1,EFNA1,EPHA4,EPHB2,EREG,ESM1,ESR1,FAIM,FAM59A,FBXW7,FEM1B,FGF9,FGFR2,FLT1,FRZB,GCNT2,GIT2,GPR27,GRIA1,GRIK3,GRIN2B,GRM8,GSK3…
GO.0007167	enzyme linked receptor protein signaling pathway	96	3.22e-09	ABI1,ABL2,ACVR1,ACVR2A,ACVR2B,ADAM10,ADCY1,ADCYAP1,APH1B,APPL1,ARHGEF2,ATP6V1C1,BCL2L11,BDNF,CBL,CCNT2,CD4,CDKN1B,CRKL,CSF1,EFNA1,EFNB2,EIF2C2,EIF2C3,EIF2C4,EPHA4,EPHB2,EREG,FAM59A,FGF9,FGFR2,FLT1,FOXO4,GCNT2,GRIN2B,GSK3B,IGF1,IRS1,ITGAV,JUN,KDR,KIF16B,KITLG,KLF10,MAGI2,MAP3K1,MAPK14,MAPKAPK3,MET,NDST1,NGFR,NGFRAP1,NOG,NPTN,NRP2,PIK3CA,PPP1CC,PRKAA2,PRKCI,PRKD2,PRLR,PTPRG,PTPRT,RAF1,RAP1A,RAPGEF2…
GO.0045893	positive regulation of transcription, DNA-templated	129	4.01e-09	ACVR1,ACVR2A,ADCYAP1,ALX4,ARHGEF2,ARID4A,ARID4B,ASH1L,ATXN1,ATXN7L3,BDNF,BRCA1,CAPRIN2,CASK,CBFB,CCNT2,CDC73,CDON,CREB5,CTCFL,CUX1,DDX3X,E2F7,EIF2C2,ELK3,ESR1,FAM48A,FGFR2,FLI1,FOSL2,FOXF1,FOXJ1,FOXO4,GABPA,GPBP1,GSK3B,HMBOX1,HNRNPD,HOXA5,HOXB1,IGF1,IKZF1,INSIG1,IRF1,IRF4,ISL1,JHDM1D,JUN,KIT,KLF5,LBH,LDB2,LHX1,MAML2,MAPK14,MECP2,MED12L,MED13,MEIS2,MEOX2,MET,MKL1,MKL2,MLLT10,MTDH,MTF2,MYBL1,MYCN,N…
GO.0051254	positive regulation of RNA metabolic process	133	4.47e-09	ACVR1,ACVR2A,ADCYAP1,ALX4,ARHGEF2,ARID4A,ARID4B,ASH1L,ATXN1,ATXN7L3,BDNF,BRCA1,CAPRIN2,CASK,CBFB,CCNT2,CDC73,CDON,CREB5,CTCFL,CUX1,DDX3X,E2F7,EIF2C2,ELK3,ESR1,FAM48A,FGFR2,FLI1,FOSL2,FOXF1,FOXJ1,FOXO4,GABPA,GPBP1,GSK3B,HMBOX1,HNRNPD,HOXA5,HOXB1,IGF1,IKZF1,INSIG1,IRF1,IRF4,ISL1,JHDM1D,JUN,KIT,KLF5,LBH,LDB2,LHX1,MAML2,MAPK14,MECP2,MED12L,MED13,MEIS2,MEOX2,MET,MKL1,MKL2,MLLT10,MTDH,MTF2,MYBL1,MYCN,N…
GO.0010557	positive regulation of macromolecule biosynthetic process	141	5.8e-09	ACVR1,ACVR2A,ADCYAP1,ALX4,ARHGEF2,ARID4A,ARID4B,ASH1L,ATXN1,ATXN7L3,BDNF,BRCA1,CAPRIN2,CASK,CBFB,CCNT2,CD4,CDC73,CDON,CREB5,CTCFL,CUX1,DAZ1,DDX3X,DNA2,E2F7,EIF2C2,EIF5A2,ELK3,EREG,ESR1,FAM48A,FGFR2,FLI1,FOSL2,FOXF1,FOXJ1,FOXO4,GABPA,GPBP1,GSK3B,HMBOX1,HNRNPD,HOXA5,HOXB1,IGF1,IKZF1,INSIG1,IRF4,IRS1,ISL1,JHDM1D,JUN,KDR,KIT,KITLG,KLF5,LBH,LDB2,LHX1,MAML2,MAPK14,MECP2,MED12L,MED13,MEIS2,MEOX2,MET,MKL…
GO.0045934	negative regulation of nucleobase-containing compound metabolic process	122	5.89e-09	ACVR2B,AKAP6,ARID4A,ARX,ATXN1L,BHLHE40,BMI1,BRCA1,CBX3,CDC73,CDKN1B,CDYL,CREBRF,CUX1,CYLD,DACH1,DNAJB5,DNMT3A,DUSP1,EFNA1,EGLN1,EIF4A2,ELK3,EREG,ESR1,ETV3,FAM105B,FBXW7,FGF9,FGFR2,FNIP2,FOXF1,FOXG1,FOXJ1,GABPA,GNAI3,GRM8,H3F3B,HIC1,HMBOX1,IRF1,ISL1,JAZF1,JUN,KANK2,KCNK2,KIAA1737,KLF10,KLF5,LCOR,LHX1,LHX9,MDFI,MDM4,MEIS2,MTA3,MTDH,MTF2,NAB1,NACA,NCOA1,NEDD4,NFIA,NFX1,NKX3-1,NLRC5,NOG,NOTCH1,NPAT,N…
GO.1902680	positive regulation of RNA biosynthetic process	130	6.21e-09	ACVR1,ACVR2A,ADCYAP1,ALX4,ARHGEF2,ARID4A,ARID4B,ASH1L,ATXN1,ATXN7L3,BDNF,BRCA1,CAPRIN2,CASK,CBFB,CCNT2,CDC73,CDON,CREB5,CTCFL,CUX1,DDX3X,E2F7,EIF2C2,ELK3,ESR1,FAM48A,FGFR2,FLI1,FOSL2,FOXF1,FOXJ1,FOXO4,GABPA,GPBP1,GSK3B,HMBOX1,HNRNPD,HOXA5,HOXB1,IGF1,IKZF1,INSIG1,IRF1,IRF4,ISL1,JHDM1D,JUN,KIT,KLF5,LBH,LDB2,LHX1,MAML2,MAPK14,MECP2,MED12L,MED13,MEIS2,MEOX2,MET,MKL1,MKL2,MLLT10,MTDH,MTF2,MYBL1,MYCN,N…
GO.0010628	positive regulation of gene expression	145	6.83e-09	ACVR1,ACVR2A,ADCYAP1,ALX4,ANK3,ARHGEF2,ARID4A,ARID4B,ASH1L,ATXN1,ATXN7L3,BDNF,BRCA1,CAPRIN2,CASK,CBFB,CCNT2,CDC73,CDON,CNTN1,CREB5,CSF1,CTCFL,CUX1,DAZ1,DDX3X,E2F7,EIF2C2,EIF5A2,ELK3,ESR1,FAM48A,FGF9,FGFR2,FLI1,FOSL2,FOXF1,FOXJ1,FOXO4,GABPA,GPBP1,GSK3B,HMBOX1,HNRNPD,HOXA5,HOXB1,IGF1,IKZF1,INSIG1,IRF1,IRF4,ISL1,JHDM1D,JUN,KIT,KLF5,LBH,LDB2,LHX1,MAML2,MAPK14,MECP2,MED12L,MED13,MEIS2,MEOX2,MET,MKL1,M…
GO.0045892	negative regulation of transcription, DNA-templated	109	6.9e-09	ACVR2B,ARID4A,ARX,ATXN1L,BHLHE40,BMI1,BRCA1,CBX3,CDC73,CDKN1B,CREBRF,CUX1,CYLD,DACH1,DNAJB5,DNMT3A,EFNA1,EGLN1,ELK3,EREG,ESR1,ETV3,FAM105B,FGF9,FGFR2,FNIP2,FOXF1,FOXG1,FOXJ1,GABPA,H3F3B,HIC1,HMBOX1,IRF1,ISL1,JAZF1,JUN,KANK2,KIAA1737,KLF10,KLF5,LCOR,LHX1,LHX9,MDFI,MDM4,MEIS2,MTA3,MTDH,MTF2,NAB1,NACA,NCOA1,NEDD4,NFIA,NFX1,NKX3-1,NLRC5,NOG,NOTCH1,NR1D2,NR2F2,NRIP2,PAX5,PHB,PHF14,POU3F2,PPM1F,PSIP1,R…
GO.0048666	neuron development	86	7.81e-09	ADAM10,ADCY1,ADCYAP1,ANK3,APH1B,ARX,ATXN10,B3GNT1,BTBD3,CACNB2,CACNB4,CNR1,CNTN1,CNTNAP1,DPYSL5,EFNA1,EFNB2,ENAH,EPHA4,FARP1,FARP2,FGFR2,FLRT3,FZD3,GAS7,GNAQ,GPM6A,GRIN2B,GSK3B,IRX5,ISL1,ITGA5,ITGAV,JUN,KCNQ3,LHX1,LHX9,LMX1A,LPPR4,MAP1B,MAP2,MAPK8IP3,MECP2,MET,NCAN,NCDN,NDEL1,NEDD4,NGFR,NOG,NOTCH1,NPTX1,NR4A3,NRK,NRP2,ONECUT2,OTX2,PACSIN1,PLXNC1,PPP1R9A,PRKCI,PRKG1,RAF1,RANBP9,RAPGEF2,RASA1,RBFOX…
GO.0008152	metabolic process	566	8.57e-09	A1CF,ABI1,ABI2,ABL2,ACOT11,ACVR1,ACYP2,ADAM10,ADAMTS3,ADCY1,ADIPOR2,AFF2,AFF3,AFF4,AGL,AK4,ALDH4A1,ALG9,ALX4,AMFR,ANAPC1,APH1B,APOC2,APPBP2,ARID2,ARIH1,ARX,ATM,ATP13A3,ATP13A4,ATP1B1,ATP2B1,ATXN1,ATXN1L,ATXN7L3,B3GNT1,B4GALT5,BAG2,BAZ2B,BBC3,BCL2L11,BCORL1,BDNF,BHLHE40,BMI1,BMP2K,C7orf60,CACNB4,CASC3,CASK,CASR,CASZ1,CBFB,CBL,CBLB,CBX3,CCNL1,CCNT2,CD4,CDC73,CDK13,CDK17,CDK19,CDKN1B,CDS1,CDYL,CDYL2…
GO.0051253	negative regulation of RNA metabolic process	113	9.92e-09	ACVR2B,ARID4A,ARX,ATXN1L,BHLHE40,BMI1,BRCA1,CBX3,CDC73,CDKN1B,CDYL,CREBRF,CUX1,CYLD,DACH1,DNAJB5,DNMT3A,EFNA1,EGLN1,EIF4A2,ELK3,EREG,ESR1,ETV3,FAM105B,FGF9,FGFR2,FNIP2,FOXF1,FOXG1,FOXJ1,GABPA,H3F3B,HIC1,HMBOX1,IRF1,ISL1,JAZF1,JUN,KANK2,KIAA1737,KLF10,KLF5,LCOR,LHX1,LHX9,MDFI,MDM4,MEIS2,MTA3,MTDH,MTF2,NAB1,NACA,NCOA1,NEDD4,NFIA,NFX1,NKX3-1,NLRC5,NOG,NOTCH1,NPAT,NR1D2,NR2F2,NRIP2,PAX5,PHB,PHF14,POU…
GO.0030182	neuron differentiation	98	1.02e-08	ADAM10,ADCY1,ADCYAP1,ANK3,APH1B,ARX,ATXN10,B3GNT1,BTBD3,CACNB2,CACNB4,CNR1,CNTN1,CNTNAP1,CUX1,DMRT3,DNMT3A,DPYSL5,EFNA1,EFNB2,ENAH,EPHA4,FARP1,FARP2,FGFR2,FLRT3,GAS7,GNAQ,GPM6A,GRIN2B,GSK3B,HIPK1,IRX5,ISL1,ITGA5,ITGAV,JUN,KCNQ3,LHX1,LHX9,LMX1A,LMX1B,LPPR4,MAP1B,MAP2,MAPK8IP3,MECP2,MET,NCAN,NCDN,NDEL1,NEDD4,NGFR,NGRN,NLGN4X,NOG,NOTCH1,NPTX1,NR4A3,NRK,NRP2,ONECUT2,PACSIN1,PLXNC1,POU3F2,PPP1CC,PPP1R…
GO.0044271	cellular nitrogen compound biosynthetic process	256	1.02e-08	ADCY1,AFF3,AFF4,AK4,ALX4,ARID2,ARID4A,ARID4B,ARX,ASH1L,ATXN1,ATXN1L,ATXN7L3,BAZ2B,BCORL1,BHLHE40,BMI1,BRCA1,CASZ1,CBFB,CBX3,CCNL1,CCNT2,CDC73,CDYL,CERS6,CHD9,CNOT6,CNOT6L,COPS2,CREB5,CREBRF,CTCFL,CUX1,DACH1,DDX3X,DMRT3,E2F7,EIF2C2,EIF2S2,EIF4A2,EIF4E2,EIF5A2,EIF5B,ELK3,ELL2,EREG,ESR1,ETV3,EYA4,FLI1,FOSL2,FOXF1,FOXG1,FOXJ1,FOXO4,FRYL,FSBP,GABPA,GARS,GLS,GMPS,GPBP1,GSPT1,GTF2E1,GUCY1A2,HBP1,HIC1,HI…
GO.0048869	cellular developmental process	239	1.18e-08	ABI1,ABL2,ACVR1,ACVR2B,ADAM10,ADCY1,ADCYAP1,AFF4,ANK3,ANLN,APCDD1,APH1B,ARID4A,ARID4B,ARX,ATXN1,ATXN10,B3GNT1,BCL2L11,BNIP2,BTBD3,BVES,C6orf170,CACNB2,CAPRIN2,CAST,CBFB,CD109,CD4,CDC73,CFL2,CLIP3,CNR1,CNTNAP1,COL27A1,COL4A3BP,CSF1,DAZ1,DAZ2,DAZ3,DDX6,DIAPH2,DIXDC1,DMRT3,DNMT3A,DPYSL5,E2F7,EFNA1,EFNB2,ELK3,ENAH,EPB41L5,EREG,ESR1,ETV3,FAM9C,FARP1,FARP2,FBXW7,FEM1B,FGF9,FLRT3,FLT1,FOXJ1,FOXO4,FRMD6,…
GO.0051173	positive regulation of nitrogen compound metabolic process	148	1.49e-08	ACVR1,ACVR2A,ADCYAP1,ALX4,ARHGEF2,ARID4A,ARID4B,ASH1L,ATXN1,ATXN7L3,BDNF,BRCA1,CAPRIN2,CASK,CBFB,CCNT2,CDC73,CDON,CREB5,CTCFL,CUX1,DAZ1,DDX3X,DNA2,E2F7,EIF2C2,EIF5A2,ELK3,EREG,ESR1,FAM48A,FGFR2,FLI1,FOSL2,FOXF1,FOXJ1,FOXO4,GABPA,GPBP1,GSK3B,GUCY1A2,HMBOX1,HNRNPD,HOXA5,HOXB1,IGF1,IKZF1,INSIG1,IRF1,IRF4,ISL1,JHDM1D,JUN,KIAA0146,KIT,KITLG,KLF5,LBH,LDB2,LHX1,LRRTM3,MAML2,MAPK14,MECP2,MED12L,MED13,MEI…
GO.0065009	regulation of molecular function	205	1.94e-08	ABI1,ABL2,ACVR2A,ACVR2B,ADCY1,ADCYAP1,AKAP6,AMFR,ANAPC1,ANK3,APH1B,APOC2,ARHGAP12,ARHGAP19,ARHGAP21,ARHGEF2,ATM,ATP1B1,BBC3,BDNF,BHLHE40,BIRC6,BMI1,BMP2K,BNIP2,BVES,CACNB2,CACNB4,CAPRIN2,CCNL1,CCNT2,CCNYL1,CD109,CD4,CDON,CHN2,CLIC2,CNKSR3,CNOT6,CNR1,COPS8,CPEB2,CRKL,CSF1,CYLD,DDX3X,DENND1B,DENND4C,DENND5B,DGKI,DLC1,DNAJA1,DNAJC3,DUSP1,EFNA1,EGLN1,EIF4A2,EPB41L5,EREG,ESR1,EVI5,FAM105B,FAM115A,FARP…
GO.0007169	transmembrane receptor protein tyrosine kinase signaling pathway	77	2.26e-08	ABI1,ABL2,ADAM10,ADCY1,ADCYAP1,APH1B,APPL1,ARHGEF2,ATP6V1C1,BCL2L11,BDNF,CBL,CD4,CDKN1B,CRKL,CSF1,EFNA1,EFNB2,EIF2C2,EIF2C3,EIF2C4,EPHA4,EPHB2,EREG,FAM59A,FGF9,FGFR2,FLT1,FOXO4,GRIN2B,GSK3B,IGF1,IRS1,ITGAV,KDR,KIF16B,KITLG,MAPK14,MAPKAPK3,MET,NDST1,NGFR,NGFRAP1,NOG,NPTN,NRP2,PIK3CA,PRKAA2,PRKCI,PRKD2,PRLR,PTPRG,PTPRT,RAF1,RAP1A,RAPGEF2,RASA1,REPS2,RET,RICTOR,ROR1,RPS6KA1,RPS6KB1,SLC9A6,SOCS5,SOCS…
GO.0044267	cellular protein metabolic process	245	2.44e-08	ABI1,ABI2,ABL2,ACVR1,ADAM10,ADAMTS5,ALG9,AMFR,ANAPC1,APH1B,ARID4A,ARID4B,ARIH1,ASH1L,ATM,ATXN7L3,B3GNT1,B4GALT5,BAG2,BMI1,BMP2K,BRCA1,CASK,CBFB,CBL,CBLB,CD4,CDC73,CDK13,CDK17,CDK19,CDYL,CLIP3,CLPP,CNTLN,COL4A3BP,COPS3,COPS8,CRKL,CSNK1E,CTCFL,CTDSP2,CTDSPL2,CTU1,CUL5,DCX,DDX3X,DNAJA1,DNAJB5,DPY19L1,DTX4,EGLN1,EIF2C2,EIF2S2,EIF4A2,EIF4E2,EIF5B,EPHA4,EPHB2,EXOC5,EYA4,FAM105B,FBXO33,FBXO43,FBXW7,FEM1…
GO.0007411	axon guidance	53	3.06e-08	ABL2,ADAM10,ANK3,APH1B,ARX,B3GNT1,BDNF,CACNB2,CACNB4,CHL1,CNTN1,CNTNAP1,DCX,DPYSL5,EFNA1,EFNB2,ENAH,EPHA4,FARP2,FLRT3,FZD3,GRIN2B,GSK3B,ISL1,ITGA5,ITGAV,KCNQ3,LHX1,LHX9,LMX1A,MAPK8IP3,MET,NCAN,NGFR,NOG,NR4A3,NRP2,OTX2,PLXNC1,RAF1,RANBP9,RASA1,RELN,ROBO2,RPS6KA1,SEMA7A,SLIT2,SOS1,SOS2,SPTBN1,TNR,WASL,YWHAB
GO.0031328	positive regulation of cellular biosynthetic process	145	4.22e-08	ACVR1,ACVR2A,ADCYAP1,ALX4,APOC2,ARHGEF2,ARID4A,ARID4B,ASH1L,ATXN1,ATXN7L3,BDNF,BRCA1,CAPRIN2,CASK,CBFB,CCNT2,CD4,CDC73,CDON,CNEP1R1,CREB5,CTCFL,CUX1,DAZ1,DDX3X,DNA2,E2F7,EIF2C2,EIF5A2,ELK3,EREG,ESR1,FAM48A,FGFR2,FLI1,FOSL2,FOXF1,FOXJ1,FOXO4,GABPA,GPBP1,GSK3B,GUCY1A2,HMBOX1,HNRNPD,HOXA5,HOXB1,IGF1,IKZF1,INSIG1,IRF4,IRS1,ISL1,JHDM1D,JUN,KIT,KITLG,KLF5,LBH,LDB2,LDLR,LHX1,MAML2,MAPK14,MECP2,MED12L,ME…
GO.0010646	regulation of cell communication	213	4.27e-08	ABL2,ACVR1,ACVR2A,ACVR2B,ADAMTS3,ADCYAP1,AKAP6,APCDD1,ARHGAP12,ARHGAP19,ARHGEF2,ASH1L,ASIC1,ATM,ATP1B1,ATXN1,BBC3,BCL2L11,BDNF,BIRC6,BRCA1,CABP1,CALB1,CAPRIN2,CBL,CBLB,CD109,CD4,CDC73,CDON,CHN2,CLSTN2,CNKSR3,CNR1,CNTNAP1,COPS8,CRKL,CSF1,CSNK1E,CTDSPL2,CYLD,DDX3X,DGKI,DLC1,DNAJA1,DZANK1,EFNA1,EPHA4,EPHB2,EREG,ESM1,ESR1,FAIM,FAM59A,FBXW7,FEM1B,FGF9,FGFR2,FLT1,FRZB,GCNT2,GIT2,GPR27,GRIA1,GRIK3,GRIN2…
GO.0009891	positive regulation of biosynthetic process	147	5.04e-08	ACVR1,ACVR2A,ADCYAP1,ALX4,APOC2,ARHGEF2,ARID4A,ARID4B,ASH1L,ATXN1,ATXN7L3,BDNF,BRCA1,CAPRIN2,CASK,CBFB,CCNT2,CD4,CDC73,CDON,CLCN3,CNEP1R1,CREB5,CTCFL,CUX1,DAZ1,DDX3X,DNA2,E2F7,EIF2C2,EIF5A2,ELK3,EREG,ESR1,FAM48A,FGFR2,FLI1,FOSL2,FOXF1,FOXJ1,FOXO4,GABPA,GPBP1,GSK3B,GUCY1A2,HMBOX1,HNRNPD,HOXA5,HOXB1,IGF1,IKZF1,INSIG1,IRF4,IRS1,ISL1,JHDM1D,JUN,KDR,KIT,KITLG,KLF5,LBH,LDB2,LDLR,LHX1,MAML2,MAPK14,MECP2…
GO.0045935	positive regulation of nucleobase-containing compound metabolic process	141	6.06e-08	ACVR1,ACVR2A,ADCYAP1,ALX4,ARHGEF2,ARID4A,ARID4B,ASH1L,ATXN1,ATXN7L3,BDNF,BRCA1,CAPRIN2,CASK,CBFB,CCNT2,CDC73,CDON,CREB5,CTCFL,CUX1,DDX3X,DNA2,E2F7,EIF2C2,ELK3,EREG,ESR1,FAM48A,FGFR2,FLI1,FOSL2,FOXF1,FOXJ1,FOXO4,GABPA,GPBP1,GSK3B,GUCY1A2,HMBOX1,HNRNPD,HOXA5,HOXB1,IGF1,IKZF1,INSIG1,IRF1,IRF4,ISL1,JHDM1D,JUN,KIAA0146,KIT,KITLG,KLF5,LBH,LDB2,LHX1,MAML2,MAPK14,MECP2,MED12L,MED13,MEIS2,MEOX2,MET,MKL1,M…
GO.0000904	cell morphogenesis involved in differentiation	73	6.22e-08	ADAM10,ADCY1,ANK3,APH1B,ARX,B3GNT1,BDNF,BTBD3,BVES,CACNB2,CACNB4,CHL1,CLIC4,CNTN1,CNTNAP1,DPYSL5,EFNA1,EFNB2,ENAH,EPB41L5,EPHA4,FARP1,FARP2,FLRT3,FRMD6,FZD3,GRIN2B,GSK3B,ISL1,ITGA5,ITGAV,KCNQ3,LHX1,LHX9,LMX1A,LPPR4,MAP1B,MAP2,MAP3K1,MAPK8IP3,MET,NCAN,NDEL1,NGFR,NOTCH1,NPTX1,NR4A3,NRP2,OTX2,PEAK1,PLXNC1,RAF1,RANBP9,RASA1,RBFOX2,RELN,ROBO2,RPS6KA1,SLC9A6,SLIT2,SLITRK1,SNAP25,SOS1,SOS2,SPR,SPTBN1,TN…
GO.1901576	organic substance biosynthetic process	317	7.74e-08	ADAMTS3,ADAMTS5,ADCY1,AFF3,AFF4,AGL,AK4,ALDH4A1,ALG9,ALX4,ARID2,ARID4A,ARID4B,ARX,ASH1L,ATM,ATXN1,ATXN1L,ATXN7L3,B3GNT1,B4GALT5,BAZ2B,BCORL1,BHLHE40,BMI1,BRCA1,CASZ1,CBFB,CBX3,CCNL1,CCNT2,CD4,CDC73,CDS1,CDYL,CERS6,CHD9,CHST1,CHSY3,CHTF8,CLIP3,CNOT6,CNOT6L,COL4A3BP,COPS2,CREB5,CREBRF,CTCFL,CUX1,CYP39A1,DACH1,DDX3X,DMRT3,DNA2,DPY19L1,DSEL,E2F7,EDEM3,EIF2C2,EIF2S2,EIF4A2,EIF4E2,EIF5A2,EIF5B,ELK3,ELL…
GO.0051174	regulation of phosphorus metabolic process	131	8.9e-08	ABI1,ABL2,ACVR1,ACVR2A,ACVR2B,ADCY1,ADCYAP1,AKAP6,APOC2,ARHGEF2,ASH1L,ATXN1,BDNF,CAPRIN2,CCNL1,CCNT2,CCNYL1,CD109,CDKN1B,CDON,CLIP3,CNEP1R1,CNKSR3,COPS8,CRKL,CSF1,CTDSP2,DIXDC1,DLC1,DNAJA1,DNAJC3,EGLN1,EPHA4,EREG,FAM59A,FARP1,FBXW7,FGF9,FGFR1OP,FGFR2,FLT1,FNIP2,GAB1,GCNT2,GNAI3,GNAQ,GRM8,GSK3B,GUCY1A2,HIPK3,IGF1,IRS1,ISL1,ITGA5,JUN,KDR,KIRREL,KIT,KITLG,LDLR,MAGI2,MAP2K4,MAP2K7,MAP3K9,MAP4K4,MAP4K…
GO.0019220	regulation of phosphate metabolic process	130	9.25e-08	ABI1,ABL2,ACVR1,ACVR2A,ACVR2B,ADCY1,ADCYAP1,AKAP6,APOC2,ARHGEF2,ASH1L,ATXN1,BDNF,CAPRIN2,CCNL1,CCNT2,CCNYL1,CD109,CDKN1B,CDON,CLIP3,CNEP1R1,CNKSR3,COPS8,CRKL,CSF1,CTDSP2,DIXDC1,DLC1,DNAJA1,DNAJC3,EGLN1,EPHA4,EREG,FAM59A,FARP1,FBXW7,FGF9,FGFR1OP,FGFR2,FLT1,FNIP2,GAB1,GCNT2,GNAI3,GNAQ,GRM8,GSK3B,GUCY1A2,HIPK3,IGF1,IRS1,ISL1,ITGA5,JUN,KDR,KIRREL,KIT,KITLG,LDLR,MAGI2,MAP2K4,MAP2K7,MAP3K9,MAP4K4,MAP4K…
GO.0051239	regulation of multicellular organismal process	182	9.76e-08	ABL2,ACVR1,ACVR2A,ACVR2B,ADCYAP1,AKAP6,APOC2,ARX,ATP1B1,ATRN,ATXN1,ATXN1L,BAI3,BCL2L11,BDNF,BMP2K,BPI,BRCA1,CAPRIN2,CBLB,CD109,CD4,CDC73,CDKN1B,CDON,CLIC2,CLSTN2,CNR1,CNTN1,CSF1,CUX1,DDX3X,DDX6,DIXDC1,DMRT3,DTX4,EFNA1,EFNB2,EGLN1,EPB41L5,EREG,ESR1,FBXW7,FGF9,FGFR2,FLRT3,FLT1,FOXJ1,FOXO4,FRZB,FZD3,GABPA,GCNT2,GJC1,GLS,GNAQ,GPAM,GRIN2D,GSTM2,HIPK1,IGF1,IGF2BP2,IGF2BP3,IGLON5,IKZF1,IRF4,IRX5,ISL1,IT…
GO.0044249	cellular biosynthetic process	312	1.12e-07	ADAMTS5,ADCY1,AFF3,AFF4,AGL,AK4,ALDH4A1,ALG9,ALX4,ARID2,ARID4A,ARID4B,ARX,ASH1L,ATM,ATXN1,ATXN1L,ATXN7L3,B3GNT1,B4GALT5,BAZ2B,BCORL1,BHLHE40,BMI1,BRCA1,CASZ1,CBFB,CBX3,CCNL1,CCNT2,CD4,CDC73,CDS1,CDYL,CERS6,CHD9,CHST1,CHSY3,CHTF8,CLIP3,CNOT6,CNOT6L,COL4A3BP,COPS2,CREB5,CREBRF,CTCFL,CUX1,CYP39A1,DACH1,DDX3X,DMRT3,DNA2,DPY19L1,DSEL,E2F7,EDEM3,EIF2C2,EIF2S2,EIF4A2,EIF4E2,EIF5A2,EIF5B,ELK3,ELL2,EREG,E…
GO.0042325	regulation of phosphorylation	114	1.25e-07	ABI1,ABL2,ACVR1,ACVR2A,ACVR2B,ADCY1,ADCYAP1,ARHGEF2,ASH1L,ATXN1,BDNF,CAPRIN2,CCNL1,CCNT2,CCNYL1,CD109,CDKN1B,CDON,CLIP3,CNKSR3,COPS8,CRKL,CSF1,CTDSP2,DIXDC1,DNAJA1,DNAJC3,EPHA4,EREG,FAM59A,FBXW7,FGF9,FGFR1OP,FGFR2,FLT1,FNIP2,GAB1,GCNT2,GNAQ,GSK3B,HIPK3,IGF1,IRS1,ISL1,ITGA5,JUN,KDR,KIRREL,KIT,KITLG,MAP2K4,MAP2K7,MAP3K9,MAP4K4,MAP4K5,MAPK14,MAPKAPK3,MDFI,MET,MMD,MOB1B,NGFR,NKX3-1,NLRC5,NOG,NPNT,NPT…
GO.0009966	regulation of signal transduction	184	1.33e-07	ABL2,ACVR1,ACVR2A,ACVR2B,ADAMTS3,ADCYAP1,AKAP6,APCDD1,ARHGAP12,ARHGAP19,ARHGEF2,ASH1L,ATM,ATXN1,BBC3,BCL2L11,BDNF,BIRC6,BRCA1,CAPRIN2,CBL,CBLB,CD109,CD4,CDC73,CDON,CHN2,CNKSR3,CNTNAP1,COPS8,CRKL,CSF1,CSNK1E,CTDSPL2,CYLD,DDX3X,DGKI,DLC1,DNAJA1,EFNA1,EPHA4,EREG,ESM1,ESR1,FAIM,FAM59A,FBXW7,FEM1B,FGF9,FGFR2,FLT1,FRZB,GCNT2,GIT2,GPR27,GRIN2B,GSK3B,HERPUD1,HHIP,HIC1,HIPK1,HIPK3,HMGXB4,IGF1,IRF1,IRF4,IR…
GO.0001932	regulation of protein phosphorylation	108	1.41e-07	ABI1,ABL2,ACVR1,ACVR2A,ACVR2B,ADCY1,ADCYAP1,ARHGEF2,ASH1L,BDNF,CAPRIN2,CCNL1,CCNT2,CCNYL1,CD109,CDON,CLIP3,CNKSR3,COPS8,CRKL,CSF1,CTDSP2,DIXDC1,DNAJA1,DNAJC3,EPHA4,EREG,FAM59A,FBXW7,FGF9,FGFR1OP,FGFR2,FLT1,FNIP2,GAB1,GCNT2,GNAQ,GSK3B,HIPK3,IGF1,ISL1,ITGA5,JUN,KDR,KIRREL,KIT,KITLG,MAP2K4,MAP2K7,MAP3K9,MAP4K4,MAP4K5,MAPK14,MAPKAPK3,MDFI,MET,MMD,NGFR,NKX3-1,NOG,NPNT,NPTN,NR2F2,PDCD10,PHB,PIK3CA,PLCL…
GO.0009790	embryo development	93	1.42e-07	ABI1,ACVR1,ACVR2A,ACVR2B,ADAM10,AFF3,ALX4,APBA2,APLNR,ATM,BCL2L11,BIRC6,BRCA1,C6orf170,CDC73,CDON,COL4A3BP,COPS3,DLC1,DNMT3A,DUSP1,E2F7,EFNA1,EGLN1,EIF2S2,EIF4E2,ENAH,EPB41L5,EPHB2,FAM48A,FGF9,FGFR2,FLT1,FOXF1,FRZB,FZD3,GAB1,GABPA,GNAQ,GRIN2B,HIPK1,HOXA5,HOXB1,INSIG1,IRX5,ISL1,ITGA5,ITGAV,KDR,KIF16B,KIT,KITLG,LMX1B,MACF1,MAPK8IP3,MEOX2,MKL2,MMP16,MYCN,NCOA1,NDEL1,NDST1,NEK2,NKX3-1,NOG,NOTCH1,NR2F…
GO.0034249	negative regulation of cellular amide metabolic process	23	1.52e-07	CAPRIN2,CNOT6L,CPEB1,CPEB2,DDX3X,EIF2C2,EIF2C3,EIF2C4,EIF4E2,FMR1,FXR1,FXR2,IGF2BP2,IGF2BP3,NANOS1,PAIP2,QKI,SAMD4A,SORL1,SYNCRIP,TNRC6A,TOB1,TSC1
GO.0006468	protein phosphorylation	82	1.61e-07	ABI1,ABI2,ABL2,ACVR1,ADAM10,ATM,BIRC6,BMP2K,CASK,CDK13,CDK17,CDK19,CNTLN,COL4A3BP,CRKL,CSNK1E,DCX,EPHA4,EPHB2,FGFR1OP,FGFR2,FLT1,FNIP2,GAB1,GSK3B,HIPK1,HIPK3,IGF1,ITGAV,JUN,KDR,MAP2K4,MAP2K7,MAP3K9,MAP4K3,MAP4K4,MAP4K5,MAPK14,MAPK8IP3,MAPKAPK3,MASTL,MDFI,MEX3B,MMD,MOB1B,NDST1,NEK2,NEK9,NPTN,NRBP1,NRP2,PAN3,PDIK1L,PEAK1,PIK3CA,PLK2,PPP4C,PRKAA2,PRKCI,PRKD2,PRKD3,PRKG1,PRKX,PRLR,RAPGEF2,RELN,RICTOR…
GO.0017148	negative regulation of translation	22	2.81e-07	CAPRIN2,CNOT6L,CPEB1,CPEB2,DDX3X,EIF2C2,EIF2C3,EIF2C4,EIF4E2,FMR1,FXR1,FXR2,IGF2BP2,IGF2BP3,NANOS1,PAIP2,QKI,SAMD4A,SYNCRIP,TNRC6A,TOB1,TSC1
GO.0007417	central nervous system development	85	3.02e-07	ABL2,ADAM23,AFF2,AK4,ARX,ATM,ATP2B1,ATRN,BCL2L11,BTBD3,CA10,CAST,CDON,CNTN1,CUL5,DIXDC1,DLC1,DMRT3,DRP2,EML1,EPHA4,FGF9,FGFR2,FMR1,FOXG1,FOXJ1,FZD3,GNAQ,GSK3B,H3F3B,HOXB1,IKZF1,ISL1,JARID2,JHDM1D,KCNJ10,KCNQ3,LMX1A,LRP2,MAP2,MAPK8IP3,MECP2,MET,NCAN,NCOA1,NDEL1,NDST1,NGFR,NLGN4X,NOG,NOTCH1,NPTX1,NR2F2,NR4A3,PCDH19,PGAP1,POU3F2,PPAP2B,PRKG1,RAPGEF2,RBFOX2,RELN,ROBO2,S1PR1,SATB2,SEMA7A,SETD2,SLC6A11…
GO.0031399	regulation of protein modification process	133	3.04e-07	ABI1,ABL2,ACVR1,ACVR2A,ACVR2B,ADCY1,ADCYAP1,AKAP6,ANAPC1,ARHGEF2,ASH1L,ATM,BDNF,BMI1,BRCA1,CAPRIN2,CCNL1,CCNT2,CCNYL1,CD109,CDON,CLIP3,CNEP1R1,CNKSR3,COPS8,CRKL,CRTAP,CSF1,CTCFL,CTDSP2,DIXDC1,DLC1,DNAJA1,DNAJC3,EPHA4,EREG,FAM59A,FARP1,FBXW7,FEM1B,FGF9,FGFR1OP,FGFR2,FLT1,FNIP2,GAB1,GCNT2,GNAQ,GSK3B,HERPUD1,HIPK3,IGF1,ISL1,ITGA5,JARID2,JUN,KDR,KIRREL,KIT,KITLG,MAGI2,MAP2K4,MAP2K7,MAP3K9,MAP4K4,MAP4…
GO.0019538	protein metabolic process	272	3.26e-07	ABI1,ABI2,ABL2,ACVR1,ADAM10,ADAMTS3,ALG9,AMFR,ANAPC1,APH1B,APOC2,ARID4A,ARID4B,ARIH1,ASH1L,ATM,ATXN7L3,B3GNT1,B4GALT5,BAG2,BBC3,BCL2L11,BMI1,BMP2K,BRCA1,CASK,CBFB,CBL,CBLB,CD4,CDC73,CDK13,CDK17,CDK19,CDKN1B,CDYL,CHSY3,CLIP3,CLPP,CNTLN,COL4A3BP,COPS3,COPS8,CPA6,CRKL,CSNK1E,CTCFL,CTDSP2,CTDSPL2,CTU1,CUL5,DCX,DDX3X,DLC1,DNAJA1,DNAJB5,DPP10,DPY19L1,DSEL,DTX4,EGLN1,EIF2C2,EIF2S2,EIF4A2,EIF4E2,EIF5B,EP…
GO.0006139	nucleobase-containing compound metabolic process	301	3.93e-07	A1CF,ADCY1,AFF2,AFF3,AFF4,AK4,ALX4,ARID2,ARID4B,ARX,ASH1L,ATXN1,ATXN1L,ATXN7L3,BAZ2B,BCORL1,BDNF,BHLHE40,BMI1,C7orf60,CACNB4,CASC3,CASK,CASZ1,CBFB,CBX3,CCNL1,CCNT2,CDC73,CDK13,CDYL,CHD9,CHTF8,CNOT6,CNOT6L,COPS2,CPEB1,CREB5,CREBRF,CSNK1E,CTCFL,CTU1,CUX1,DACH1,DCP2,DDX3X,DDX6,DMRT3,DNA2,E2F7,EIF2C2,EIF2C3,EIF2C4,EIF4A2,ELAVL4,ELK3,ELL2,EREG,ESR1,ETV3,EYA4,FLI1,FOSL2,FOXF1,FOXG1,FOXJ1,FOXO4,FRYL,FSB…
GO.0000122	negative regulation of transcription from RNA polymerase II promoter	78	3.99e-07	ACVR2B,ARX,ATXN1,ATXN1L,BHLHE40,BMI1,CDC73,CREBRF,CUX1,DACH1,DNAJB5,DNMT3A,EFNA1,ETV3,FGF9,FGFR2,FNIP2,FOXF1,FOXJ1,GABPA,HIC1,IKZF1,ISL1,JARID2,JAZF1,JUN,KANK2,KLF10,KLF5,LCOR,MDFI,MDM4,MECP2,MEIS2,MTDH,MTF2,NACA,NCOA1,NEDD4,NFIA,NFX1,NOG,NOTCH1,NR2F2,NRIP2,PAX5,PHB,PHF14,POU3F2,PSIP1,RTF1,RYBP,SATB2,SCRT2,SMARCA2,STRAP,SUZ12,TAF3,TBL1XR1,TBX18,TMBIM6,TRIM33,WHSC1,WWC2,XPO1,YEATS2,YY1,ZBTB20,ZBTB…
GO.0050790	regulation of catalytic activity	170	5.19e-07	ABI1,ABL2,ACVR2A,ACVR2B,ADCY1,ADCYAP1,AKAP6,ANAPC1,APH1B,APOC2,ARHGAP12,ARHGAP19,ARHGAP21,ARHGEF2,ATM,ATP1B1,BBC3,BIRC6,BMI1,BMP2K,BNIP2,BVES,CABP1,CCNL1,CCNT2,CCNYL1,CD109,CD4,CHN2,CNR1,COPS8,CPEB2,CRKL,CSF1,DDX3X,DENND1B,DENND4C,DENND5B,DGKI,DLC1,DNAJA1,DNAJC3,DUSP1,EFNA1,EGLN1,EIF4A2,EREG,ESR1,EVI5,FARP1,FARP2,FBXW7,FEM1B,FGFR1OP,FGFR2,FICD,FLT1,FOXJ1,GAB1,GIT2,GNAI3,GNAQ,GOPC,GSK3B,HERPUD1,HI…
GO.0010608	posttranscriptional regulation of gene expression	46	5.31e-07	CAPRIN2,CASC3,CNOT6,CNOT6L,CPEB1,CPEB2,DAZ1,DDX3X,DDX6,EIF2C2,EIF2C3,EIF2C4,EIF4A2,EIF4E2,EIF5A2,EIF5B,EPB41L5,FMR1,FXR1,FXR2,GCNT2,IGF2BP2,IGF2BP3,LIN28B,MAPK14,MATR3,METAP1,NANOS1,NCBP2,PAIP2,PSTK,QKI,RBM24,RBMS3,RC3H1,RC3H2,RPS6KA1,RPS6KB1,SAMD4A,SYNCRIP,TNRC6A,TOB1,TSC1,UHMK1,ZFP36L2,ZNF385A
GO.0051094	positive regulation of developmental process	101	6e-07	ABL2,ACVR1,ACVR2A,ACVR2B,AKAP6,ARX,ATXN1,ATXN1L,BAI3,BDNF,BNIP2,BRCA1,CAPRIN2,CBLB,CLSTN2,CNR1,CNTN1,CSF1,CUX1,EFNB2,EPB41L5,EPHA4,FGF9,FGFR2,FLRT3,FLT1,FOXJ1,FRZB,FZD3,GCNT2,GPAM,GSK3B,HIPK1,HOXA5,IGF1,IKZF1,ISL1,ITSN2,KDR,KIT,KITLG,KLF10,KLF5,LHX1,LRRTM3,MACF1,MAGI2,MAP1B,MECP2,MIA3,MKL2,MMD,MTDH,NACA,NCOA1,NDEL1,NOG,NOTCH1,NPNT,NPTN,OPA1,OTX2,PACSIN1,PDE3A,POU3F2,PRKCI,PRKD2,RAP1A,RAPGEF2,RELN…
GO.0009058	biosynthetic process	316	7.68e-07	ADAMTS3,ADAMTS5,ADCY1,AFF3,AFF4,AGL,AK4,ALDH4A1,ALG9,ALX4,ARID2,ARID4A,ARID4B,ARX,ASH1L,ATM,ATXN1,ATXN1L,ATXN7L3,B3GNT1,B4GALT5,BAZ2B,BCORL1,BHLHE40,BMI1,BRCA1,CASZ1,CBFB,CBX3,CCNL1,CCNT2,CD4,CDC73,CDS1,CDYL,CERS6,CHD9,CHST1,CHSY3,CHTF8,CLIP3,CNOT6,CNOT6L,COL4A3BP,COPS2,CREB5,CREBRF,CTCFL,CUX1,CYP39A1,DACH1,DDX3X,DMRT3,DNA2,DPY19L1,DSEL,E2F7,EDEM3,EIF2C2,EIF2S2,EIF4A2,EIF4E2,EIF5B,ELK3,ELL2,EREG,…
GO.0048583	regulation of response to stimulus	234	7.68e-07	ABI1,ABL2,ACVR1,ACVR2A,ACVR2B,ADAM10,ADAMTS3,ADCYAP1,AKAP6,APCDD1,ARHGAP12,ARHGAP19,ARHGEF2,ASH1L,ATM,ATP1B1,ATXN1,BAG2,BBC3,BCL2L11,BDNF,BIRC6,BRCA1,CA7,CACNB4,CAPRIN2,CASK,CBL,CBLB,CD109,CDC73,CDK19,CDKN1B,CDON,CHN2,CNKSR3,CNR1,CNTNAP1,COPS8,CRKL,CSF1,CSNK1E,CTDSPL2,CYLD,DDX3X,DGKI,DLC1,DNAJA1,DNAJC3,DZANK1,EFNA1,EFNB2,EIF2C2,EIF2C3,EIF2C4,ENAH,EREG,ESM1,ESR1,FAIM,FAM105B,FAM59A,FBXW7,FEM1B,FGF…
GO.0051240	positive regulation of multicellular organismal process	116	8.25e-07	ABL2,ACVR1,ACVR2A,ACVR2B,ADCYAP1,AKAP6,APOC2,ARHGEF2,ARX,ATXN1,ATXN1L,BAI3,BDNF,BRCA1,CAPRIN2,CBLB,CD4,CDON,CLSTN2,CNR1,CNTN1,CSF1,CUX1,DDX3X,DTX4,EFNB2,EPB41L5,EPHA4,EREG,FGF9,FGFR2,FLRT3,FLT1,FOXJ1,FZD3,GCNT2,GPAM,GSK3B,HIPK1,HOXA5,IGF1,IKZF1,IRF4,ISL1,ITSN2,JUN,KDR,KIT,KITLG,KLF10,KNG1,LHX1,LRRTM3,MACF1,MAGI2,MAP1B,MAPK14,MECP2,MET,MIA3,MKL2,MMD,MTDH,NACA,NCOA1,NDEL1,NKX3-1,NOG,NOTCH1,NPNT,NPT…
GO.0071363	cellular response to growth factor stimulus	68	9.62e-07	ACVR1,ACVR2A,ACVR2B,ADCY1,ADCYAP1,APH1B,ARHGEF2,BCL2L11,BDNF,CBL,CCNT2,CDKN1B,CRKL,EIF2C2,EIF2C3,EIF2C4,EPB41L5,EREG,FAM59A,FGF9,FGFR2,FLT1,FOXO4,GAB1,GCNT2,GSK3B,IRS1,JUN,KDR,KIF16B,KIT,KITLG,KLF10,LHX1,MAGI2,MAP3K1,MAPK14,MAPKAPK3,NDST1,NGFR,NGFRAP1,NOG,NOTCH1,NRP2,PDE3A,PIK3CA,PPP1CC,PRKCI,PRKD2,RAF1,RAP1A,RAPGEF2,RICTOR,RPS6KA1,RPS6KB1,SLC33A1,SORT1,SOS1,SOS2,SOX5,SP1,STRAP,TFDP2,TNRC6A,TRIM3…
GO.0001944	vasculature development	56	9.69e-07	ACVR1,ACVR2B,ADIPOR2,CLIC4,CRKL,E2F7,EFNA1,ELK3,EPHB2,EREG,ESM1,FAM105B,FBXW7,FGF9,FGFR2,FLT1,FOXF1,GJC1,IGF1,ITGA5,ITGAV,JUN,KDR,KLF5,LOX,MAPK14,MEOX2,MKL1,MKL2,NAA15,NEDD4,NKX3-1,NOTCH1,NR2F2,NRP2,PDCD10,PDPN,PIK3CA,PPAP2B,PRKD2,PRKX,PTPN14,PTPRB,QKI,RAPGEF2,RASA1,RECK,RORA,S1PR1,SETD2,SLIT2,SMARCA2,TGFA,VEGFC,ZFP36L1,ZFPM2
GO.0071310	cellular response to organic substance	147	1.15e-06	ABL2,ACVR1,ACVR2A,ACVR2B,ADCY1,ADCYAP1,ADIPOR2,AKAP6,AMFR,APH1B,APPL1,ARHGEF2,ARIH1,ATP2B1,ATP6V1C1,BCL2L11,BDNF,BRCA1,CALB1,CBL,CCNT2,CDC73,CDK19,CPEB1,CPEB2,CRKL,CSF1,CTDSP2,DENND4C,DNAJC3,DNMT3A,DUSP1,EIF2C2,EIF2C3,EIF2C4,EIF4A2,EIF4E2,EPB41L5,EREG,ESR1,ESRRG,FAM59A,FGF9,FGFR2,FLT1,FOXF1,FOXO4,GABRA1,GCNT2,GSK3B,GSTM2,HERPUD1,HSPA9,IRF1,IRF4,IRS1,ISL1,JUN,KDR,KIAA0146,KIF16B,KITLG,KLF6,KLF9,KP…
GO.0070848	response to growth factor	69	1.45e-06	ACVR1,ACVR2A,ACVR2B,ADCY1,ADCYAP1,APH1B,ARHGEF2,BCL2L11,BDNF,CBL,CCNT2,CDKN1B,CRKL,EIF2C2,EIF2C3,EIF2C4,EPB41L5,EREG,FAM59A,FGF9,FGFR2,FLT1,FOXO4,GAB1,GCNT2,GSK3B,IRS1,JUN,KDR,KIF16B,KIT,KITLG,KLF10,LHX1,MAGI2,MAP3K1,MAPK14,MAPKAPK3,MEIS2,NDST1,NGFR,NGFRAP1,NOG,NOTCH1,NRP2,PDE3A,PIK3CA,PPP1CC,PRKCI,PRKD2,RAF1,RAP1A,RAPGEF2,RICTOR,RPS6KA1,RPS6KB1,SLC33A1,SORT1,SOS1,SOS2,SOX5,SP1,STRAP,TFDP2,TNRC6A…
GO.0016043	cellular component organization	309	1.53e-06	ABI2,ACTR6,ADAM10,ADAMTS3,ADAMTS5,ADCY1,ADCYAP1,AMFR,ANAPC1,ANK3,ANLN,APH1B,APOC2,ARHGAP21,ARID2,ARL6IP1,ARX,ASIC1,ATP1B1,ATP6V1C1,ATXN1L,ATXN7L3,B3GNT1,BAP1,BBC3,BCL2L11,BCORL1,BIRC6,BMI1,BRCA1,BRWD3,BSN,BTBD3,BVES,C6orf170,CACNB2,CACNB4,CADM2,CAMSAP2,CASK,CBX3,CDC73,CDYL,CENPO,CEP135,CEP350,CHD9,CLIC4,CLINT1,CLPP,CLVS2,CNEP1R1,CNR1,CNTLN,CNTN1,CNTNAP1,COL21A1,COL27A1,COL4A3BP,CRTAP,CSNK1E,CTCFL…
GO.0034248	regulation of cellular amide metabolic process	41	2.15e-06	CAPRIN2,CASC3,CNOT6,CNOT6L,CPEB1,CPEB2,DAZ1,DDX3X,DDX6,EIF2C2,EIF2C3,EIF2C4,EIF4A2,EIF4E2,EIF5A2,EIF5B,FMR1,FXR1,FXR2,HNRNPD,IGF2BP2,IGF2BP3,LRRTM3,METAP1,NANOS1,NCBP2,PAIP2,PSTK,QKI,RBMS3,RPS6KA1,RPS6KB1,SAMD4A,SORL1,SYNCRIP,TNRC6A,TOB1,TSC1,UHMK1,ZFP36L1,ZNF385A
GO.0000902	cell morphogenesis	88	2.21e-06	ABI1,ADAM10,ADCY1,ANK3,APH1B,ARHGEF2,ARX,B3GNT1,BTBD3,BVES,C6orf170,CACNB2,CACNB4,CHL1,CLIC4,CNTN1,CNTNAP1,COL4A3BP,DPYSL5,EFNA1,EFNB2,ENAH,EPB41L5,EPHA4,FARP1,FARP2,FLRT3,FOXJ1,FRMD6,FZD3,GAS7,GPM6A,GRIN2B,GSK3B,ISL1,ITGA5,ITGAV,KCNQ3,LHX1,LHX9,LMX1A,LPPR4,MAP1B,MAP2,MAP3K1,MAPK14,MAPK8IP3,MET,NCAN,NDEL1,NGFR,NOTCH1,NPTX1,NR4A3,NRK,NRP2,ONECUT2,OTX2,PACSIN1,PDPN,PEAK1,PLXNC1,RAF1,RANBP9,RASA1,RB…
GO.0071495	cellular response to endogenous stimulus	93	2.38e-06	ACVR1,ACVR2A,ACVR2B,ADCY1,ADIPOR2,AKAP6,APPL1,ARHGEF2,ATP2B1,ATP6V1C1,BDNF,BRCA1,CBL,CCNT2,CDKN1B,CPEB1,CPEB2,DENND4C,DNMT3A,DUSP1,EIF2C2,EIF2C3,EIF2C4,EPB41L5,EREG,ESR1,ESRRG,FAM59A,FGF9,FGFR2,FOXO4,GAB1,GABRA1,GCNT2,GSK3B,GSTM2,IRS1,ISL1,JUN,KIAA0146,KIF16B,KITLG,KLF6,KLF9,LHX1,MAGI2,MAP3K1,NCOA1,NDST1,NKX3-1,NOG,NOTCH1,NPAS4,NPFFR1,NR1D2,NR2F2,NR4A3,NR5A2,PDE3A,PIK3CA,PPP1CC,PRKCI,PRLR,RAF1,RA…
GO.0045595	regulation of cell differentiation	122	2.44e-06	ABL2,ACVR1,ACVR2A,ACVR2B,AKAP6,ARHGEF2,ATXN1,BNIP2,CAPRIN2,CD109,CDC73,CNR1,CNTN1,CSF1,CUX1,CYLD,DDX6,DIXDC1,EFNA1,EFNB2,EPB41L5,EPHB2,EREG,FGF9,FGFR2,FOXF1,FOXJ1,FOXO4,FZD3,GABPA,GCNT2,GNAQ,HOXA5,IGF1,IGLON5,IKZF1,INSIG1,IRF1,IRF4,ISL1,ITGAV,ITSN2,KITLG,KLF10,KLF5,LDB2,LHX1,LMX1A,MACF1,MAGI2,MAP1B,MEIS2,MKL1,MMD,MTF2,MYCN,NACA,NCOA1,NEDD4,NFYA,NGFR,NOG,NOTCH1,NPNT,NPTN,NR1D2,OPA1,PACSIN1,PDE3A,P…
GO.0023052	signaling	319	2.62e-06	ABI1,ABI2,ABL2,ACOT11,ACVR1,ACVR2A,ACVR2B,ADAM10,ADCYAP1,ADIPOR2,AKAP6,AMFR,ANK3,APBA2,APCDD1,APH1B,APLNR,APOC2,APPL1,ARHGAP12,ARHGAP19,ARHGAP21,ARHGEF2,ARIH1,ARL10,ARL5A,ASH1L,ASIC1,ATM,ATP1B1,ATP6V1C1,ATXN1,BAI3,BBC3,BRCA1,BSN,C6orf170,CACNB2,CASK,CASR,CBL,CCNT2,CD4,CDC73,CDKN1B,CDS1,CENPO,CHL1,CHN2,CLCN3,CLIC2,CLIP1,CNR1,CNTLN,CNTN1,CNTNAP1,COL4A3BP,COPS2,COPS3,COPS8,CRKL,CSF1,CSNK1E,CTDSP2,CU…
GO.0001568	blood vessel development	53	2.88e-06	ACVR1,ACVR2B,ADIPOR2,CLIC4,CRKL,E2F7,EFNA1,EFNB2,ELK3,EPHB2,EREG,ESM1,FAM105B,FBXW7,FGF9,FGFR2,FLT1,FOXF1,GJC1,ITGA5,ITGAV,JUN,KDR,KLF5,LOX,MAPK14,MEOX2,MKL1,MKL2,NAA15,NEDD4,NKX3-1,NOTCH1,NR2F2,NRP2,PDCD10,PIK3CA,PPAP2B,PRKD2,PRKX,PTPRB,QKI,RAPGEF2,RASA1,RECK,RORA,S1PR1,SETD2,SLIT2,TGFA,VEGFC,ZFP36L1,ZFPM2
GO.0006417	regulation of translation	39	3.02e-06	CAPRIN2,CASC3,CNOT6,CNOT6L,CPEB1,CPEB2,DAZ1,DDX3X,DDX6,EIF2C2,EIF2C3,EIF2C4,EIF4A2,EIF4E2,EIF5A2,EIF5B,FMR1,FXR1,FXR2,HNRNPD,IGF2BP2,IGF2BP3,METAP1,NANOS1,NCBP2,PAIP2,PSTK,QKI,RBMS3,RPS6KA1,RPS6KB1,SAMD4A,SYNCRIP,TNRC6A,TOB1,TSC1,UHMK1,ZFP36L1,ZNF385A
GO.0032989	cellular component morphogenesis	93	3.26e-06	ABI1,ADAM10,ADCY1,ANK3,APH1B,ARHGEF2,ARX,B3GNT1,BTBD3,BVES,C6orf170,CACNB2,CACNB4,CFL2,CHL1,CLIC4,CNTN1,CNTNAP1,COL4A3BP,DPYSL5,EFNA1,EFNB2,ENAH,EPB41L5,EPHA4,FARP1,FARP2,FLRT3,FOXJ1,FRMD6,FZD3,GAS7,GPM6A,GRIN2B,GSK3B,ISL1,ITGA5,ITGAV,KCNQ3,LHX1,LHX9,LMX1A,LPPR4,MAP1B,MAP2,MAP3K1,MAPK14,MAPK8IP3,MET,MYPN,NCAN,NDEL1,NEBL,NGFR,NOTCH1,NPTX1,NR4A3,NRK,NRP2,ONECUT2,OTX2,PACSIN1,PDPN,PEAK1,PLXNC1,RAF1,…
GO.0048858	cell projection morphogenesis	74	3.26e-06	ABI1,ADAM10,ADCY1,ANK3,APH1B,ARX,B3GNT1,BTBD3,C6orf170,CACNB2,CACNB4,CHL1,CNTN1,CNTNAP1,DPYSL5,EFNA1,EFNB2,ENAH,EPHA4,FARP1,FARP2,FGFR2,FLRT3,FOXJ1,FZD3,GAS7,GPM6A,GRIN2B,GSK3B,ISL1,ITGA5,ITGAV,KCNQ3,LHX1,LHX9,LMX1A,LPPR4,MAP1B,MAP2,MAPK8IP3,MET,NCAN,NDEL1,NGFR,NOG,NPTX1,NR4A3,NRK,NRP2,ONECUT2,OTX2,PACSIN1,PLXNC1,RAF1,RANBP9,RASA1,RBFOX2,RELN,RFX3,ROBO2,RPS6KA1,SLC9A6,SLIT2,SLITRK1,SNAP25,SOS1,SO…
GO.0006366	transcription from RNA polymerase II promoter	77	3.39e-06	AFF4,ALX4,ARID4A,ASH1L,CBFB,CCNT2,COPS2,CREB5,CTCFL,CUX1,DACH1,ELK3,ELL2,ESR1,FLI1,FOXF1,FOXJ1,FOXO4,GABPA,GLS,GTF2E1,HOXA5,IRF1,IRF4,ISL1,JUN,KLF5,LCOR,LHX1,MAML2,MED13,MEIS2,MEOX2,MYBL1,NCBP2,NCOA1,NFAT5,NFIA,NFX1,NFYA,NKX3-1,NOTCH1,NPAS4,NR1D2,NRBF2,NRBP1,ONECUT2,OTX2,PHB,PLAGL2,POU2F3,POU3F2,PRKAA2,PSIP1,RNGTT,RORA,SESN1,SETD2,SIX4,SMARCA2,SOX5,STAG1,STAG2,TAF3,TBPL1,TCF4,TEAD1,TFDP2,TRIM33,T…
GO.0044700	single organism signaling	318	3.45e-06	ABI1,ABI2,ABL2,ACOT11,ACVR1,ACVR2A,ACVR2B,ADAM10,ADCYAP1,ADIPOR2,AKAP6,AMFR,ANK3,APBA2,APCDD1,APH1B,APLNR,APOC2,APPL1,ARHGAP12,ARHGAP19,ARHGAP21,ARHGEF2,ARIH1,ARL10,ARL5A,ASH1L,ASIC1,ATM,ATP1B1,ATP6V1C1,ATXN1,BAI3,BBC3,BRCA1,BSN,C6orf170,CACNB2,CASK,CASR,CBL,CCNT2,CD4,CDC73,CDKN1B,CDS1,CENPO,CHL1,CHN2,CLCN3,CLIC2,CLIP1,CNR1,CNTLN,CNTN1,CNTNAP1,COL4A3BP,COPS2,COPS3,COPS8,CRKL,CSF1,CSNK1E,CTDSP2,CU…
GO.1902531	regulation of intracellular signal transduction	116	3.45e-06	ABL2,ADCYAP1,AKAP6,ARHGAP12,ARHGAP19,ARHGEF2,ASH1L,ATM,BBC3,BCL2L11,CBL,CD4,CDON,CHN2,CNKSR3,COPS8,CRKL,CSF1,CYLD,DDX3X,DGKI,DIXDC1,DLC1,DNAJA1,EFNA1,EPHA4,EREG,ESR1,FAM59A,FBXW7,FGF9,FGFR2,FLT1,GAB1,GCNT2,GRIN2B,HERPUD1,HIC1,HIPK3,IGF1,ISL1,KDR,KIT,KITLG,MAGI2,MAP2K4,MAP2K7,MAP3K9,MAP4K4,MAP4K5,MAPK14,MAPKAPK3,MDFI,MET,MIER1,MTDH,NEDD4,NFAT5,NGFR,NKX3-1,NOTCH1,NPNT,NRK,OPA1,PDCD10,PDE10A,PHB,PLA…
GO.0007166	cell surface receptor signaling pathway	157	4e-06	ABI1,ABL2,ACVR1,ACVR2A,ACVR2B,ADAM10,ADCY1,ADCYAP1,ADIPOR2,APCDD1,APH1B,APPL1,ARHGEF2,ARIH1,ATP6V1C1,BDNF,C6orf170,CACNB4,CBL,CBLB,CCNT2,CD4,CDC73,CDKN1B,CNTN1,CRKL,CSF1,CSNK1E,CYLD,DDX3X,DIXDC1,DST,DTX4,EFNA1,EFNB2,EIF2C2,EIF2C3,EIF2C4,EIF4A2,EIF4E2,ENAH,EPHA4,EPHB2,EREG,FAM105B,FAM59A,FARP2,FBXW7,FGF9,FGFR2,FLT1,FOXF1,FOXO4,FRZB,FZD3,GCNT2,GNAQ,GRIA1,GRIK3,GRIN2B,GRIN2D,GRM8,HBP1,HHIP,HIC1,HMGX…
GO.0030030	cell projection organization	90	4.22e-06	ABI1,ADAM10,ADCY1,ADCYAP1,ANK3,APH1B,ARX,ATXN10,B3GNT1,BTBD3,C6orf170,CACNB2,CACNB4,CNR1,CNTN1,CNTNAP1,DPYSL5,EFNA1,EFNB2,ENAH,EPHA4,FARP1,FARP2,FGFR2,FLRT3,FOXJ1,FZD3,GAS7,GPM6A,GRIN2B,GSK3B,ISL1,ITGA5,ITGAV,JUN,KCNQ3,KIT,KLF5,LHX1,LHX9,LMX1A,LPPR4,MAP1B,MAP2,MAPK8IP3,MECP2,MET,MTSS1L,NCAN,NCDN,NDEL1,NEDD4,NGFR,NOG,NPTX1,NR4A3,NRK,NRP2,ONECUT2,OTX2,PACSIN1,PLXNC1,PPP1R9A,PRKG1,RAF1,RANBP9,RAPGEF…
GO.0032990	cell part morphogenesis	75	4.42e-06	ABI1,ADAM10,ADCY1,ANK3,APH1B,ARX,B3GNT1,BTBD3,C6orf170,CACNB2,CACNB4,CHL1,CNTN1,CNTNAP1,COL4A3BP,DPYSL5,EFNA1,EFNB2,ENAH,EPHA4,FARP1,FARP2,FGFR2,FLRT3,FOXJ1,FZD3,GAS7,GPM6A,GRIN2B,GSK3B,ISL1,ITGA5,ITGAV,KCNQ3,LHX1,LHX9,LMX1A,LPPR4,MAP1B,MAP2,MAPK8IP3,MET,NCAN,NDEL1,NGFR,NOG,NPTX1,NR4A3,NRK,NRP2,ONECUT2,OTX2,PACSIN1,PLXNC1,RAF1,RANBP9,RASA1,RBFOX2,RELN,RFX3,ROBO2,RPS6KA1,SLC9A6,SLIT2,SLITRK1,SNAP2…
GO.0007420	brain development	67	4.76e-06	ABL2,AFF2,AK4,ARX,ATM,ATP2B1,ATRN,BCL2L11,BTBD3,CA10,CAST,CDON,CNTN1,CUL5,DCX,DIXDC1,DLC1,EML1,EPHB2,FGF9,FGFR2,FOXG1,FOXJ1,FZD3,GNAQ,GSK3B,H3F3B,HOXB1,IKZF1,ISL1,JHDM1D,LMX1A,LRP2,MAPK8IP3,MECP2,MET,NCOA1,NDEL1,NDST1,NLGN4X,NOG,NOTCH1,NR2F2,NR4A3,PCDH19,PGAP1,POU3F2,PRKG1,RAPGEF2,RBFOX2,RELN,ROBO2,S1PR1,SATB2,SEMA7A,SETD2,SLC6A11,SLC7A11,SLC8A1,SLIT2,SOCS7,TNR,TOP2B,TSC1,TTC21B,TYRO3,ZFHX3
GO.0043009	chordate embryonic development	65	4.85e-06	ABI1,ACVR1,ACVR2A,ADAM10,ALX4,APBA2,ATM,BCL2L11,BIRC6,BRCA1,C6orf170,COL4A3BP,COPS3,DLC1,E2F7,EGLN1,EIF2S2,EIF4E2,ENAH,EPB41L5,FGF9,FGFR2,FOXF1,FZD3,GAB1,GABPA,GRIN2B,HOXA5,HOXB1,IRX5,ISL1,LMX1B,MAPK8IP3,MDFI,MEOX2,MKL2,MMP16,MYCN,NCOA1,NDEL1,NDST1,NEK2,NKX3-1,NOG,NOTCH1,NR2F2,OPA1,OTX2,PALB2,PCDH8,PHACTR4,RTF1,SATB2,SETD2,SLC8A1,SLIT2,SOX5,SP1,SULF1,TBX18,TSC1,UBR3,ZEB1,ZFP36L1,ZFPM2
GO.0048513	organ development	192	5.45e-06	ABI1,ABL2,ACVR1,ACVR2A,ACVR2B,ADIPOR2,AFF2,AK4,ANLN,APCDD1,APLNR,ARID4A,ARID4B,ARX,ATP2B1,ATRN,ATXN1,ATXN1L,BCL2L11,BDNF,BIRC6,BMI1,BTBD3,BVES,C6orf170,CA10,CACNB4,CALB1,CAST,CBFB,CD109,CD4,CDK13,CDKN1B,CDON,CNTN1,COL27A1,COL4A3BP,CRKL,CSF1,CUL5,CUX1,DCX,DIXDC1,DLC1,DMRT3,E2F7,EFNA1,EFNB2,EGLN1,EIF2S2,EPB41L5,EPHA4,EREG,ESR1,FARP2,FBXW7,FEM1B,FGFR2,FOXF1,FOXG1,FOXJ1,FOXO4,FRZB,FXR1,GAB1,GJC1,GNAQ…
GO.0046483	heterocycle metabolic process	304	5.87e-06	A1CF,ADCY1,AFF2,AFF3,AFF4,AK4,ALDH4A1,ALX4,ARID2,ARID4B,ARX,ASH1L,ATXN1,ATXN1L,ATXN7L3,BAZ2B,BCORL1,BDNF,BHLHE40,BMI1,C7orf60,CACNB4,CASC3,CASK,CASZ1,CBFB,CBX3,CCNL1,CCNT2,CDC73,CDK13,CDYL,CHD9,CHTF8,CNOT6,CNOT6L,COPS2,CPEB1,CREB5,CREBRF,CRTAP,CSNK1E,CTCFL,CTU1,CUX1,DACH1,DCP2,DDX3X,DDX6,DMRT3,DNA2,E2F7,EGLN1,EIF2C2,EIF2C3,EIF2C4,EIF4A2,ELAVL4,ELK3,ELL2,EREG,ESR1,ETV3,EYA4,FLI1,FOSL2,FOXF1,FOXG1,…
GO.0051130	positive regulation of cellular component organization	100	6.4e-06	ABI2,ABL2,APOC2,ATP1B1,BAI3,BAP1,BBC3,BCL2L11,BDNF,BRCA1,CA7,CAPRIN2,CBL,CDKN1B,CFL2,CLIP1,CLIP3,CLSTN2,CNOT6,CNOT6L,CNR1,CNTN1,CUX1,DPP10,DZANK1,EIF5A2,EPB41L5,EPHA4,EPHB2,EREG,ESPL1,FAM115A,FBXW7,FLRT3,GCNT2,GPM6A,GSK3B,IGF1,ISL1,ITGAV,ITSN2,JARID2,JUN,KDR,KIAA0146,KIRREL,KIT,LMAN1,LRRTM3,MACF1,MAP1B,MAP3K1,MAPK14,MECP2,MIER1,MTF2,NBPF3,NDEL1,NGFR,NOTCH1,NPTN,OPA1,PACSIN1,PAN3,PIK3CA,PLAGL2,PMA…
GO.0071840	cellular component organization or biogenesis	311	7.11e-06	ABI2,ACTR6,ADAM10,ADAMTS3,ADAMTS5,ADCY1,ADCYAP1,AMFR,ANAPC1,ANK3,ANLN,APH1B,APOC2,ARHGAP21,ARID2,ARL6IP1,ARX,ASIC1,ATP1B1,ATP6V1C1,ATXN1L,ATXN7L3,B3GNT1,BAP1,BBC3,BCL2L11,BCORL1,BIRC6,BMI1,BRCA1,BRWD3,BSN,BTBD3,BVES,C6orf170,C7orf60,CACNB2,CACNB4,CADM2,CAMSAP2,CASK,CBX3,CDC73,CDYL,CENPO,CEP135,CEP350,CHD9,CLIC4,CLINT1,CLIP3,CLPP,CLVS2,CNEP1R1,CNR1,CNTLN,CNTN1,CNTNAP1,COL21A1,COL27A1,COL4A3BP,CRTA…
GO.0035556	intracellular signal transduction	142	7.71e-06	ABI1,ABI2,ACOT11,ACVR1,ACVR2A,ACVR2B,ADCY1,AKAP6,ARHGAP12,ARHGAP19,ARHGEF2,ARL10,ARL5A,ATM,ATP1B1,BBC3,BCL2L11,BRCA1,CBLB,CDKN1B,CENPO,CHN2,CLIC2,CLIP1,CNTLN,COPS8,CRKL,CUL5,CYLD,DCX,DDX3X,DGKA,DGKH,DGKI,DIAPH2,DLC1,DUSP1,E2F7,EIF2C2,EIF2C3,EIF2C4,EREG,FAM105B,FARP2,FGF9,FGFR2,FLRT3,FNIP2,FOXO4,GOPC,GSTM2,GUCY1A2,H3F3B,HIC1,HIPK1,IGF1,IRS1,ITGAV,JUN,KDR,KIT,KITLG,MAP2K4,MAP2K7,MAP3K9,MAP4K3,MAP4K…
GO.0048514	blood vessel morphogenesis	46	8.97e-06	ACVR1,ADIPOR2,CLIC4,E2F7,EFNA1,EFNB2,ELK3,EPHB2,EREG,ESM1,FAM105B,FBXW7,FGF9,FGFR2,FLT1,FOXF1,GJC1,ITGA5,ITGAV,JUN,KDR,KLF5,MAPK14,MEOX2,MKL1,MKL2,NAA15,NEDD4,NOTCH1,NR2F2,NRP2,PDCD10,PIK3CA,PRKD2,PRKX,PTPRB,QKI,RASA1,RORA,S1PR1,SETD2,SLIT2,TGFA,VEGFC,ZFP36L1,ZFPM2
GO.0010648	negative regulation of cell communication	101	9.35e-06	ABL2,ACVR1,APCDD1,ARHGEF2,ASH1L,ASIC1,ATXN1,BDNF,BIRC6,BRCA1,CABP1,CBL,CBLB,CD109,CNKSR3,CSNK1E,CTDSPL2,CYLD,DDX3X,DLC1,DNAJA1,ESR1,FAIM,FBXW7,FGF9,FRZB,GRIA1,GRIK3,GSK3B,HERPUD1,HHIP,HIC1,HIPK3,HMGXB4,IGF1,IL19,IRF4,IRS1,ISL1,ITGAV,KANK2,MAGI2,MAPK14,MDFI,MKL1,NEDD4,NGFR,NKX3-1,NLGN4X,NLRC5,NOG,NOTCH1,ONECUT2,OPA1,PDE8B,PHACTR4,PHB,PHF14,PLCL2,PLK2,PPP1CC,PRKAA2,RAB11FIP5,RAF1,RANBP9,RAP1A,RAP1B…
GO.0044093	positive regulation of molecular function	133	9.35e-06	ABI1,ABL2,ACVR2B,ADCY1,ADCYAP1,AKAP6,AMFR,ANAPC1,ANK3,APH1B,APOC2,ARHGAP12,ARHGAP19,ARHGAP21,ARHGEF2,ATP1B1,BBC3,BDNF,BMI1,BNIP2,CAPRIN2,CD4,CDKN1B,CHN2,CLIC2,CNKSR3,CNOT6,COPS8,CRKL,CSF1,DDX3X,DENND1B,DENND4C,DENND5B,DLC1,EFNA1,EPB41L5,EREG,ESR1,EVI5,FAM115A,FARP1,FARP2,FBXW7,FGFR2,FLT1,FOXJ1,GAB1,GIT2,GNAQ,GSK3B,GSTM2,HERPUD1,IGF1,IRF4,IRS1,ISL1,ITSN2,JUN,KIAA1432,KIT,KITLG,MAGI2,MAP2K4,MAP2K7,…
GO.0006725	cellular aromatic compound metabolic process	302	1.2e-05	A1CF,ADCY1,AFF2,AFF3,AFF4,AK4,ALX4,ARID2,ARID4B,ARX,ASH1L,ATXN1,ATXN1L,ATXN7L3,BAZ2B,BCORL1,BDNF,BHLHE40,BMI1,C7orf60,CACNB4,CASC3,CASK,CASZ1,CBFB,CBX3,CCNL1,CCNT2,CDC73,CDK13,CDYL,CHD9,CHTF8,CNOT6,CNOT6L,COPS2,CPEB1,CREB5,CREBRF,CSNK1E,CTCFL,CTU1,CUX1,DACH1,DCP2,DDX3X,DDX6,DMRT3,DNA2,E2F7,EIF2C2,EIF2C3,EIF2C4,EIF4A2,ELAVL4,ELK3,ELL2,EREG,ESR1,ETV3,EYA4,FLI1,FOSL2,FOXF1,FOXG1,FOXJ1,FOXO4,FRYL,FSB…
GO.0009888	tissue development	124	1.23e-05	ABI1,ACVR1,ACVR2A,ACVR2B,ALX4,APCDD1,ARHGAP12,ARID4A,ARID4B,ARX,ATM,ATP2B1,BDNF,BIRC6,C6orf170,CACNB4,CALB1,CD109,CDC73,CDON,COL27A1,CSF1,CUX1,DLC1,DUSP1,E2F7,EFNA1,EFNB2,EGLN1,ENAH,EPB41L5,EPHA4,EREG,ESR1,FEM1B,FGF9,FOXF1,FOXJ1,FRMD6,FRZB,GAB1,GJC1,GPM6A,GSK3B,HHIP,HIPK1,HOXA5,IGF1,IRX5,ISL1,ITGA5,ITGAV,JUN,KCNQ3,KIF16B,KIT,KITLG,KLF10,KLF5,KRT76,LDB2,MACF1,MAGI2,MAP3K1,MAPK14,MEGF11,MEOX2,MIA3,…
GO.0044087	regulation of cellular component biogenesis	65	1.31e-05	BAI3,BBC3,BCL2L11,BDNF,BRCA1,CDKN1B,CLIP1,CLIP3,CLSTN2,CNOT6,CNOT6L,CYLD,DDX3X,DLC1,EPB41L5,EPHB2,FARP2,FLRT3,GPM6A,GSK3B,INSIG1,JUN,KDR,KIAA0146,KIRREL,KIT,KLF5,LDB2,LRRTM3,MACF1,MAGI2,MAP3K1,MAPRE1,MECP2,MSN,NOTCH1,PAN3,PLK2,PMAIP1,PPFIA1,PPM1F,RAB5A,RAF1,RAP1A,RAP1B,RAPGEF2,RASA1,RICTOR,ROBO2,S1PR1,SACS,SCFD1,SIX4,SLIT2,SLITRK1,SNAP25,SORL1,SPTBN1,TENM1,TMOD2,TMSB10,TRIM9,TRIOBP,TSC1,WASL
GO.0051247	positive regulation of protein metabolic process	114	1.35e-05	ABI1,ABL2,ACVR1,ACVR2A,ACVR2B,ADCY1,ADCYAP1,AKAP6,ANAPC1,ARHGEF2,BBC3,BDNF,BMI1,BRCA1,CAPRIN2,CBLB,CDKN1B,CDON,CLIP3,CNEP1R1,COPS8,CREBRF,CRKL,CSF1,CSNK1E,DAZ1,DDX3X,DLC1,EIF5A2,EPHA4,EREG,ESPL1,FAM59A,FBXW7,FGF9,FGFR2,FLT1,FNIP2,GAB1,GCNT2,GSK3B,HERPUD1,HNRNPD,IGF1,IRF1,IRF4,ISL1,ITGA5,JARID2,KDR,KIT,KITLG,LRRTM3,MAGI2,MAP2K4,MAP2K7,MAP3K9,MAP4K5,MAPK14,MAPK8IP3,MAPKAPK3,MASTL,MDFI,MET,MMD,MSN,M…
GO.0007154	cell communication	320	1.42e-05	ABI1,ABI2,ABL2,ACOT11,ACVR1,ACVR2A,ACVR2B,ADAM10,ADCYAP1,ADIPOR2,AKAP6,AMFR,ANK3,APBA2,APCDD1,APH1B,APLNR,APOC2,APPL1,ARHGAP12,ARHGAP19,ARHGAP21,ARHGEF2,ARIH1,ARL10,ARL5A,ASH1L,ASIC1,ATM,ATP1B1,ATP2B1,ATP6V1C1,ATXN1,BAI3,BBC3,BRCA1,BSN,C6orf170,CACNB2,CASK,CASR,CBL,CCNT2,CD4,CDC73,CDKN1B,CDS1,CENPO,CHL1,CHN2,CLCN3,CLIC2,CLIP1,CNR1,CNTLN,CNTN1,CNTNAP1,COL4A3BP,COPS2,COPS3,COPS8,CRKL,CSF1,CSNK1E,CT…
GO.0040011	locomotion	101	1.46e-05	ABI2,ACVR1,ADAM10,ANK3,ANLN,APCDD1,APH1B,ARX,ATP1B1,B3GNT1,BDNF,CACNB2,CACNB4,CD4,CNTN1,CNTNAP1,CUL5,DCX,DIXDC1,DNAJA1,DPYSL5,DST,EFNA1,EFNB2,ENAH,EPB41L5,FARP2,FLRT3,FLT1,FOXJ1,FZD3,GPM6A,GRIN2B,HOXA5,IL16,ISL1,ITGA5,ITGAV,KCNQ3,KDR,KITLG,LHX1,LHX9,LMX1A,MAPK14,MAPK8IP3,MSN,NANOS1,NCAN,NEDD4,NGFR,NOG,NOTCH1,NR2F2,NR4A3,NRP2,NUP153,OTX2,PDCD10,PEAK1,PHACTR4,PIK3CA,PLXNC1,POU3F2,PPAP2B,PRKCI,PRKG1…
GO.0051960	regulation of nervous system development	67	1.54e-05	ABL2,ARHGEF2,ATXN1,BAI3,BDNF,CAPRIN2,CDON,CLSTN2,CNR1,CNTN1,CSF1,CUX1,DDX6,DIXDC1,FLRT3,FZD3,GSK3B,IGF1,IGLON5,ISL1,ITSN2,KIT,LHX1,LMX1A,LRRTM3,MACF1,MAGI2,MAP1B,MECP2,MMD,MYCN,NCOA1,NEDD4,NPTN,OPA1,PACSIN1,PLK2,POU3F2,PRKCI,RAP1A,RAPGEF2,RELN,RET,RNF6,ROBO2,SCRT2,SEMA7A,SIX4,SLITRK1,SORL1,SOX5,SPP1,STK24,SYT1,TCF4,TIMP2,TNIK,TNR,ULK2,VANGL2,VEGFC,VWC2L,WASF3,YWHAG,ZEB1,ZFHX3,ZNF536
GO.0023057	negative regulation of signaling	99	2.06e-05	ABL2,ACVR1,APCDD1,ARHGEF2,ASH1L,ASIC1,ATXN1,BDNF,BIRC6,BRCA1,CBL,CBLB,CD109,CNKSR3,CSNK1E,CTDSPL2,CYLD,DDX3X,DLC1,DNAJA1,ESR1,FAIM,FBXW7,FGF9,FRZB,GRIA1,GRIK3,GSK3B,HERPUD1,HHIP,HIC1,HIPK3,HMGXB4,IGF1,IL19,IRF4,IRS1,ISL1,ITGAV,KANK2,MAGI2,MAPK14,MDFI,MKL1,NEDD4,NGFR,NKX3-1,NLGN4X,NLRC5,NOG,NOTCH1,ONECUT2,OPA1,PDE8B,PHACTR4,PHB,PHF14,PLCL2,PLK2,PPP1CC,PRKAA2,RAB11FIP5,RAF1,RANBP9,RAP1A,RAP1B,RASA1…
GO.0016310	phosphorylation	93	2.46e-05	ABI1,ABI2,ABL2,ACVR1,ADAM10,AK4,ATM,BDNF,BIRC6,BMP2K,CASK,CDK13,CDK17,CDK19,CNTLN,COL4A3BP,CRKL,CSNK1E,DCX,DGKA,DGKH,DGKI,EPHA4,EPHB2,FGFR1OP,FGFR2,FLT1,FNIP2,GAB1,GSK3B,HIPK1,HIPK3,IGF1,ITGAV,JUN,KDR,MAP2K4,MAP2K7,MAP3K9,MAP4K3,MAP4K4,MAP4K5,MAPK14,MAPK8IP3,MAPKAPK3,MASTL,MDFI,MECP2,MEX3B,MMD,MOB1B,N4BP2,NDST1,NEK2,NEK9,NPTN,NRBP1,NRP2,PAN3,PDIK1L,PEAK1,PGM2L1,PI4KB,PIK3CA,PLK2,PPP4C,PRKAA2,PRKC…
GO.0032270	positive regulation of cellular protein metabolic process	107	2.46e-05	ABI1,ABL2,ACVR1,ACVR2A,ACVR2B,ADCY1,ADCYAP1,AKAP6,ANAPC1,ARHGEF2,BBC3,BDNF,BMI1,BRCA1,CAPRIN2,CDKN1B,CDON,CLIP3,CNEP1R1,COPS8,CRKL,CSF1,CSNK1E,DAZ1,DDX3X,DLC1,EIF5A2,EPHA4,EREG,ESPL1,FAM59A,FBXW7,FGF9,FGFR2,FLT1,FNIP2,GAB1,GCNT2,GSK3B,HERPUD1,HNRNPD,IGF1,ISL1,ITGA5,JARID2,KDR,KIT,KITLG,MAGI2,MAP2K4,MAP2K7,MAP3K9,MAP4K5,MAPK14,MAPK8IP3,MAPKAPK3,MASTL,MDFI,MET,MMD,MSN,MTF2,NGFR,NGFRAP1,NKX3-1,NPNT,…
GO.1902533	positive regulation of intracellular signal transduction	76	2.74e-05	ABL2,ADCYAP1,AKAP6,ATM,BBC3,BCL2L11,CBL,CD4,CDON,COPS8,CRKL,CSF1,DGKI,EFNA1,EPHA4,EREG,FAM59A,FBXW7,FGF9,FGFR2,FLT1,GAB1,GCNT2,HIC1,IGF1,ISL1,KDR,KIT,KITLG,MAP2K4,MAP2K7,MAP3K9,MAP4K5,MAPK14,MAPK8IP3,MAPKAPK3,MDFI,MET,MIER1,MTDH,NEDD4,NGFR,NKX3-1,NOTCH1,NPNT,NRK,PDCD10,PHB,PLAGL2,PLK2,PMAIP1,PRKD2,PRLR,PSAP,RAF1,RAP1A,RAP1B,RAPGEF2,RC3H1,RC3H2,RRAGD,SASH1,SEMA7A,SOS1,SOS2,SPRED2,TENM1,TGFA,TIMP2,…
GO.0042327	positive regulation of phosphorylation	77	2.8e-05	ABI1,ABL2,ACVR1,ACVR2A,ACVR2B,ADCY1,ADCYAP1,ARHGEF2,BDNF,CAPRIN2,CDON,CLIP3,COPS8,CRKL,CSF1,EPHA4,EREG,FAM59A,FBXW7,FGF9,FGFR2,FLT1,FNIP2,GAB1,GCNT2,GSK3B,IGF1,IRS1,ISL1,ITGA5,KDR,KIT,KITLG,MAP2K4,MAP2K7,MAP3K9,MAP4K5,MAPK14,MAPK8IP3,MAPKAPK3,MDFI,MET,MMD,MOB1B,NGFR,NKX3-1,NPNT,NPTN,PDCD10,PHB,PIK3CA,PPAP2B,PRKAA2,PRKD2,PRLR,PSAP,RAF1,RAP1A,RAP1B,RAP2C,RAPGEF2,RELN,RICTOR,SASH1,SEMA7A,SLK,STK24,T…
GO.0044707	single-multicellular organism process	338	3.18e-05	ABI1,ABL2,ACVR1,ACVR2A,ACVR2B,ADAM10,ADAM23,ADAMTS3,ADCYAP1,AFF2,AFF3,AK4,ANK3,APH1B,APOC2,ARHGEF2,ARID4A,ARID4B,ARX,ASH1L,ATP1B1,ATRN,ATXN1,ATXN10,ATXN1L,B3GNT1,BBC3,BCL2L11,BHLHE40,BIRC6,BMI1,BRCA1,BSN,BTBD3,BVES,C6orf170,CA10,CAPRIN2,CASR,CAST,CASZ1,CBFB,CD109,CDC73,CDK13,CDKN1B,CDON,CLCN3,CNR1,CNTNAP1,COL27A1,COL4A3BP,COPS3,CRKL,CSF1,CSNK1E,CUL5,CYP39A1,DACH1,DAZ1,DAZ2,DAZ3,DDX6,DGKA,DGKH,DIA…
GO.1901360	organic cyclic compound metabolic process	311	3.81e-05	A1CF,ADCY1,AFF2,AFF3,AFF4,AK4,ALDH4A1,ALX4,ARID2,ARID4B,ARX,ASH1L,ATXN1,ATXN1L,ATXN7L3,BAZ2B,BCORL1,BDNF,BHLHE40,BMI1,C7orf60,CACNB4,CASC3,CASK,CASZ1,CBFB,CBX3,CCNL1,CCNT2,CDC73,CDK13,CDYL,CHD9,CHTF8,CNOT6,CNOT6L,COPS2,CPEB1,CREB5,CREBRF,CRTAP,CSNK1E,CTCFL,CTU1,CUX1,DACH1,DCP2,DDX3X,DDX6,DMRT3,DNA2,E2F7,EGLN1,EIF2C2,EIF2C3,EIF2C4,EIF4A2,ELAVL4,ELK3,ELL2,EREG,ESR1,ETV3,EYA4,FLI1,FOSL2,FOXF1,FOXG1,…
GO.0001934	positive regulation of protein phosphorylation	74	4.48e-05	ABI1,ABL2,ACVR1,ACVR2A,ACVR2B,ADCY1,ADCYAP1,ARHGEF2,BDNF,CAPRIN2,CDON,CLIP3,COPS8,CRKL,CSF1,EPHA4,EREG,FAM59A,FBXW7,FGF9,FGFR2,FLT1,FNIP2,GAB1,GCNT2,GSK3B,IGF1,ISL1,ITGA5,KDR,KIT,KITLG,MAP2K4,MAP2K7,MAP3K9,MAP4K5,MAPK14,MAPK8IP3,MAPKAPK3,MDFI,MET,MMD,NGFR,NKX3-1,NPNT,NPTN,PDCD10,PHB,PIK3CA,PPAP2B,PRKD2,PRLR,PSAP,RAF1,RAP1A,RAP1B,RAP2C,RAPGEF2,RELN,RICTOR,SASH1,SEMA7A,SLK,STK24,TENM1,TGFA,TIMP2,TN…
GO.0018193	peptidyl-amino acid modification	78	4.6e-05	ABI1,ABI2,ABL2,ACVR1,ALG9,ARID4A,ARID4B,ASH1L,ATM,B4GALT5,BMI1,BRCA1,CDYL,CLIP3,CNTLN,CRTAP,CSNK1E,DCX,DPY19L1,EDEM3,EGLN1,EIF5A2,EPHA4,EPHB2,FGFR1OP,FGFR2,FLT1,GSK3B,HIPK3,IRF4,KDR,LMAN1,MAN1A1,MAP2,MAP2K4,MAP2K7,MAP3K9,MAPK14,MAPKAPK3,MCFD2,MECP2,MET,METAP1,MLL3,MSL1,MSL2,NCOA1,NMT2,NPTN,NRP2,NUP153,PEAK1,PHF20,PPIG,PRKAA2,PRKD2,PRKX,PRLR,RELN,RET,RICTOR,ROR1,RTF1,RUVBL2,SEC23A,SEC24A,SETD2,ST6…
GO.0045859	regulation of protein kinase activity	66	4.6e-05	ABI1,ACVR2B,ADCY1,ADCYAP1,CCNL1,CCNT2,CCNYL1,CD4,COPS8,CRKL,CSF1,DNAJA1,DNAJC3,DUSP1,EFNA1,EPHA4,EREG,FBXW7,FGFR1OP,FLT1,GAB1,GNAQ,HIPK3,KIT,KITLG,MAP2K4,MAP2K7,MAP3K9,MAP4K5,MAPK14,MAPK8IP3,MAPKAPK3,MDFI,MET,MMD,NKX3-1,NR2F2,PDCD10,PIK3CA,PPM1F,PRLR,RAF1,RAP1A,RAP2C,RAPGEF2,RELN,SASH1,SLK,SOCS5,SOCS6,SORL1,SPDYE1,SPDYE2,SPDYE3,SPRED2,STK24,TENM1,TGFA,TNIK,TSC1,VANGL2,WNK1,YWHAB,YWHAG,ZAK,ZNF675
GO.0043410	positive regulation of MAPK cascade	47	4.77e-05	ABL2,ADCYAP1,CDON,CRKL,EFNA1,EPHA4,EREG,FAM59A,FBXW7,FGF9,FGFR2,FLT1,GAB1,GCNT2,IGF1,KDR,KIT,KITLG,MAP2K4,MAP2K7,MAP3K9,MAP4K5,MAPK14,MAPK8IP3,MAPKAPK3,MDFI,MET,NGFR,NPNT,NRK,PDCD10,PHB,PRKD2,PSAP,RAF1,RAP1A,RAP1B,RAPGEF2,SASH1,SEMA7A,TENM1,TGFA,TIMP2,TNIK,VANGL2,YWHAB,ZAK
GO.0060322	head development	67	5.02e-05	ABL2,AFF2,AK4,ARX,ATM,ATP2B1,ATRN,BCL2L11,BTBD3,CA10,CAST,CDON,CNTN1,CUL5,DCX,DIXDC1,DLC1,EML1,EPHB2,FGF9,FGFR2,FOXG1,FOXJ1,FZD3,GNAQ,GSK3B,H3F3B,HOXB1,IKZF1,ISL1,JHDM1D,LMX1A,LRP2,MAPK8IP3,MECP2,MET,NCOA1,NDEL1,NDST1,NLGN4X,NOG,NOTCH1,NR2F2,NR4A3,PCDH19,PGAP1,POU3F2,PRKG1,RAPGEF2,RBFOX2,RELN,ROBO2,S1PR1,SATB2,SEMA7A,SETD2,SLC6A11,SLC7A11,SLC8A1,SLIT2,SOCS7,TNR,TOP2B,TSC1,TTC21B,TYRO3,ZFHX3
GO.0006935	chemotaxis	62	5.41e-05	ABL2,ADAM10,ANK3,APH1B,ARX,B3GNT1,BDNF,CACNB2,CACNB4,CHL1,CNTN1,CNTNAP1,DCX,DPYSL5,EFNA1,EFNB2,ENAH,EPHA4,FARP2,FLRT3,FLT1,FZD3,GRIN2B,GSK3B,IL16,ISL1,ITGA5,ITGAV,KCNQ3,KIT,LHX1,LHX9,LMX1A,MAPK14,MAPK8IP3,MET,NCAN,NGFR,NOG,NR4A3,NRP2,OTX2,PIK3CA,PLXNC1,RAF1,RANBP9,RASA1,RELN,ROBO2,RPS6KA1,S1PR1,SEMA7A,SLIT2,SOS1,SOS2,SPP1,SPTBN1,TNR,VEGFC,WASL,XCR1,YWHAB
GO.0032501	multicellular organismal process	348	5.41e-05	ABI1,ABL2,ACVR1,ACVR2A,ACVR2B,ADAM10,ADAM23,ADAMTS3,ADCYAP1,AFF2,AFF3,AFF4,AK4,ANK3,APH1B,APOC2,ARHGEF2,ARID4A,ARID4B,ARX,ASH1L,ATP1B1,ATRN,ATXN1,ATXN10,ATXN1L,B3GNT1,BBC3,BCL2L11,BHLHE40,BIRC6,BMI1,BPY2,BPY2B,BPY2C,BRCA1,BSN,BTBD3,BVES,C6orf170,CA10,CAPRIN2,CASR,CAST,CASZ1,CBFB,CD109,CDC73,CDK13,CDKN1B,CDON,CDYL,CLCN3,CNR1,CNTNAP1,COL27A1,COL4A3BP,COPS3,CREBRF,CRKL,CRTAP,CSF1,CSNK1E,CTCFL,CUL5,C…
GO.0051641	cellular localization	154	5.41e-05	ABL2,ACVR2B,AKAP6,ANK3,ANKRD13C,APPBP2,ARFIP1,ARHGAP21,ARL6IP1,ATP1B1,ATXN1,BBC3,BCL2L11,BDNF,C6orf170,CASC3,CASK,CBLB,CBLN4,CD4,CLINT1,CLIP1,CLVS2,CNEP1R1,CNTLN,CNTNAP1,COL4A3BP,CSNK1E,CUX1,DENND4C,DGKI,DNAJA1,DPP10,DYNC1LI2,ENAH,ESPL1,EVI5,EXOC5,FAM18B1,FAM18B2,FGF9,FGFR2,FRMD6,FTH1,GLS,GOLGA1,GOPC,GPAM,GSK3B,HEBP2,HERPUD1,HMGXB4,HOOK1,IGF1,IPO7,IPO8,IRS1,JUN,KIAA1432,KIF16B,KIT,KNG1,KPNA5,LMAN…
GO.0050804	modulation of synaptic transmission	33	6.07e-05	ASIC1,BDNF,CA7,CALB1,CLSTN2,CNR1,DGKI,EPHB2,GRIA1,GRIK3,GRIN2B,GRM8,KCNJ10,KIT,MECP2,NCDN,NGFR,NLGN4X,NPTN,PLCL2,PLK2,RAB5A,RAP1A,RAP1B,RAPGEF2,RELN,RIMS3,SLC6A1,SNAP25,SYNJ1,SYT1,TNR,YWHAG
GO.0072358	cardiovascular system development	73	6.18e-05	ACVR1,ACVR2B,APLNR,ATM,CLIC4,COL4A3BP,CRKL,DLC1,E2F7,EFNA1,EGLN1,ELK3,EPHB2,EREG,ESM1,FAM105B,FBXW7,FGF9,FGFR2,FLT1,FOXF1,GAB1,GJC1,GNAQ,IGF1,ISL1,ITGA5,ITGAV,JUN,KCNK2,KDR,KLF5,LOX,MAPK14,MEOX2,MKL1,MKL2,MOSPD3,NAA15,NACA,NEBL,NEDD4,NKX3-1,NOTCH1,NR2F2,NRP2,PDCD10,PDPN,PIK3CA,POGLUT1,PPAP2B,PRKD2,PRKX,PTPN14,PTPRB,QKI,RAF1,RAPGEF2,RASA1,RECK,RORA,S1PR1,SETD2,SLC8A1,SLIT2,SMARCA2,TBX18,TGFA,TSC1,…
GO.0072359	circulatory system development	73	6.18e-05	ACVR1,ACVR2B,APLNR,ATM,CLIC4,COL4A3BP,CRKL,DLC1,E2F7,EFNA1,EGLN1,ELK3,EPHB2,EREG,ESM1,FAM105B,FBXW7,FGF9,FGFR2,FLT1,FOXF1,GAB1,GJC1,GNAQ,IGF1,ISL1,ITGA5,ITGAV,JUN,KCNK2,KDR,KLF5,LOX,MAPK14,MEOX2,MKL1,MKL2,MOSPD3,NAA15,NACA,NEBL,NEDD4,NKX3-1,NOTCH1,NR2F2,NRP2,PDCD10,PDPN,PIK3CA,POGLUT1,PPAP2B,PRKD2,PRKX,PTPN14,PTPRB,QKI,RAF1,RAPGEF2,RASA1,RECK,RORA,S1PR1,SETD2,SLC8A1,SLIT2,SMARCA2,TBX18,TGFA,TSC1,…
GO.0048598	embryonic morphogenesis	57	7.03e-05	ACVR1,ACVR2A,ACVR2B,AFF3,ALX4,APLNR,BCL2L11,C6orf170,CDC73,CDON,DLC1,DUSP1,EFNA1,ENAH,EPB41L5,EPHB2,FAM48A,FGF9,FGFR2,FLT1,FOXF1,FRZB,FZD3,GNAQ,HIPK1,HOXA5,HOXB1,INSIG1,IRX5,ITGA5,ITGAV,KIF16B,LHX1,MACF1,MDFI,MMP16,MYCN,NCOA1,NDST1,NOG,NOTCH1,NR4A3,OPA1,PCDH8,PHACTR4,PPAP2B,RET,RTF1,SATB2,SETD2,SP1,TBX18,TSC1,TSHZ1,VEGFC,ZEB1,ZFP36L1
GO.0051962	positive regulation of nervous system development	46	8.16e-05	ABL2,ATXN1,BAI3,BDNF,CAPRIN2,CDON,CLSTN2,CNR1,CNTN1,CSF1,CUX1,EPHA4,FLRT3,FZD3,GSK3B,IGF1,ITSN2,KIT,LHX1,LRRTM3,MACF1,MAGI2,MAP1B,MECP2,MMD,NCOA1,NDEL1,NPTN,OPA1,PACSIN1,PRKCI,RAP1A,RAPGEF2,RELN,RET,ROBO2,SEMA7A,SLIT2,SLITRK1,SYT1,TCF4,TIMP2,VEGFC,VWC2L,WASF3,ZEB1
GO.0022603	regulation of anatomical structure morphogenesis	77	8.38e-05	BAI3,BDNF,BRCA1,BRWD3,BVES,CAPRIN2,CSF1,CSNK1E,CUX1,CYLD,DLC1,DMRT3,EFNA1,EGLN1,EPB41L5,EPHB2,ESR1,FBXW7,FGFR2,FLT1,FOXJ1,FOXO4,GAS7,GCNT2,GSK3B,HIPK1,HOXA5,ISL1,ITSN2,KDR,KIT,LHX1,MACF1,MAGI2,MAP1B,MAPK14,MET,MKLN1,MTDH,NACA,NDEL1,NEDD4,NOG,NOTCH1,OPA1,OTX2,PALM2,PDCD10,PDPN,POU3F2,PRKD2,PRPF40A,RAP1A,RAPGEF2,RASA1,RC3H1,RELN,RET,RNF6,ROBO2,SASH1,SEMA7A,SH3D19,SIX4,SPP1,STRAP,SULF1,SYT1,TBX18,TN…
GO.0006928	movement of cell or subcellular component	106	9.3e-05	ABI1,ABI2,ACVR1,ADAM10,AMFR,ANK3,ANLN,APCDD1,APH1B,ARHGAP21,ARX,ATP1B1,B3GNT1,BDNF,CACNB2,CACNB4,CNTN1,CNTNAP1,CUL5,DCX,DIXDC1,DNAJA1,DPYSL5,DST,DYNC1LI2,EFNA1,EFNB2,ENAH,EPB41L5,FARP2,FLRT3,FLT1,FOXJ1,FRMD6,FZD3,GPM6A,GRIN2B,HOXA5,IGF1,IL16,ISL1,ITGA5,ITGAV,KCNQ3,KDR,KIF11,KIF16B,KITLG,LHX1,LHX9,LMX1A,MAP1B,MAPK14,MAPK8IP3,MSN,NANOS1,NCAN,NGFR,NOG,NOTCH1,NR2F2,NR4A3,NRP2,OPA1,OTX2,PDCD10,PEAK1,P…
GO.0032879	regulation of localization	163	9.39e-05	ADAM10,ADCYAP1,ADIPOR2,AKAP6,ANK3,ANKRD13C,APOC2,APPL1,ARFIP1,ARHGAP21,ASIC1,ATP1B1,BAP1,BBC3,BCL2L11,CA7,CACNB2,CASK,CBL,CDKN1B,CLCN3,CLIC2,CLIC4,CLIP3,CNR1,CNTN1,CREBRF,CSF1,CTDSPL2,CYLD,DACH1,DLC1,DNAJA1,DPP10,EFNA1,EPB41L5,FAM115A,FBXW7,FGFR1OP,FLT1,FOXF1,GAB1,GCC2,GCNT2,GJC1,GNAQ,GOLPH3L,GOPC,GPAM,GPR27,GSK3B,GSTM2,HBP1,IGF1,INSIG1,IRS1,ISL1,ITGAV,KCNJ10,KCNJ3,KCNK10,KCNK2,KCNQ3,KDR,KIAA0146…
GO.0048589	developmental growth	39	9.41e-05	ACVR2B,APBA2,BDNF,CLIC4,COL27A1,CSF1,DCX,EPB41L5,EREG,ESR1,FGFR2,GPD2,HOXA5,IGF1,LHX1,MAGI2,MAP1B,MAPK14,NACA,NDEL1,NLGN4X,NOTCH1,NRP2,PALB2,PRLR,PSAP,PTPN12,RC3H2,RTF1,S1PR1,SEMA7A,SLC25A25,SLC9A6,SLITRK1,TBL1XR1,TIMP3,ULK2,VANGL2,ZFP36L1
GO.0038179	neurotrophin signaling pathway	36	0.00011	ADCY1,ADCYAP1,APH1B,ARHGEF2,BCL2L11,CDKN1B,CRKL,EIF2C2,EIF2C3,EIF2C4,EREG,FGF9,FGFR2,FOXO4,GAB1,GSK3B,IRS1,KIT,KITLG,MAGI2,MAPK14,MAPKAPK3,NGFR,NGFRAP1,PIK3CA,PRKCI,RAF1,RAP1A,RAPGEF2,RICTOR,RPS6KA1,SORT1,SOS1,SOS2,TNRC6A,YWHAB
GO.0043549	regulation of kinase activity	68	0.000111	ABI1,ACVR2B,ADCY1,ADCYAP1,CCNL1,CCNT2,CCNYL1,CD4,COPS8,CRKL,CSF1,DNAJA1,DNAJC3,DUSP1,EFNA1,EPHA4,EREG,FBXW7,FGFR1OP,FLT1,GAB1,GNAQ,HIPK3,IRS1,KIT,KITLG,MAP2K4,MAP2K7,MAP3K9,MAP4K5,MAPK14,MAPK8IP3,MAPKAPK3,MDFI,MET,MMD,NKX3-1,NLRC5,NR2F2,PDCD10,PIK3CA,PPM1F,PRLR,RAF1,RAP1A,RAP2C,RAPGEF2,RELN,SASH1,SLK,SOCS5,SOCS6,SORL1,SPDYE1,SPDYE2,SPDYE3,SPRED2,STK24,TENM1,TGFA,TNIK,TSC1,VANGL2,WNK1,YWHAB,YWHAG,…
GO.0045937	positive regulation of phosphate metabolic process	83	0.000111	ABI1,ABL2,ACVR1,ACVR2A,ACVR2B,ADCY1,ADCYAP1,AKAP6,APOC2,ARHGEF2,BDNF,CAPRIN2,CDON,CLIP3,CNEP1R1,COPS8,CRKL,CSF1,DLC1,EPHA4,EREG,FAM59A,FBXW7,FGF9,FGFR2,FLT1,FNIP2,GAB1,GCNT2,GSK3B,GUCY1A2,IGF1,IRS1,ISL1,ITGA5,KDR,KIT,KITLG,MAGI2,MAP2K4,MAP2K7,MAP3K9,MAP4K5,MAPK14,MAPK8IP3,MAPKAPK3,MDFI,MET,MMD,MOB1B,NGFR,NKX3-1,NPNT,NPTN,PDCD10,PHB,PIK3CA,PPAP2B,PRKAA2,PRKD2,PRLR,PSAP,RAF1,RAP1A,RAP1B,RAP2C,RAPGE…
GO.0070887	cellular response to chemical stimulus	163	0.000112	ABL2,ACVR1,ACVR2A,ACVR2B,ADCY1,ADCYAP1,ADIPOR2,AKAP6,AMFR,ANK3,APH1B,APPL1,ARHGEF2,ARIH1,ATP2B1,ATP6V1C1,BBC3,BCL2L11,BDNF,BRCA1,CALB1,CBL,CCNT2,CDC73,CDK19,CLIC4,CPEB1,CPEB2,CRKL,CSF1,CTDSP2,CYP39A1,DDX3X,DENND4C,DNAJC3,DNMT3A,DUSP1,EGLN1,EIF2C2,EIF2C3,EIF2C4,EIF4A2,EIF4E2,EPB41L5,EREG,ESR1,ESRRG,FAM59A,FGF9,FGFR2,FLT1,FOXF1,FOXO4,GABRA1,GCNT2,GSK3B,GSTM2,HERPUD1,HSPA9,IL16,IRF1,IRF4,IRS1,ISL1,J…
GO.0007165	signal transduction	291	0.000131	ABI1,ABI2,ABL2,ACOT11,ACVR1,ACVR2A,ACVR2B,ADAM10,ADCYAP1,ADIPOR2,AKAP6,AMFR,ANK3,APCDD1,APH1B,APLNR,APOC2,APPL1,ARHGAP12,ARHGAP19,ARHGAP21,ARHGEF2,ARIH1,ARL10,ARL5A,ASIC1,ATM,ATP1B1,ATP6V1C1,BAI3,BBC3,BRCA1,C6orf170,CACNB4,CASR,CBL,CCNT2,CD4,CDC73,CDKN1B,CDS1,CENPO,CHL1,CHN2,CLIC2,CLIP1,CNR1,CNTLN,CNTN1,CNTNAP1,COL4A3BP,COPS2,COPS3,COPS8,CRKL,CSF1,CSNK1E,CTDSP2,CUL5,CYLD,DCX,DDX3X,DGKI,DIAPH2,DIX…
GO.0090287	regulation of cellular response to growth factor stimulus	31	0.000165	ACVR2A,ADAMTS3,CASK,CD109,CTDSPL2,FGF9,FGFR2,FLT1,HHIP,ITGA5,NEDD4,NGFR,NOG,NOTCH1,NPNT,NPTN,ONECUT2,OTX2,PPP1CC,PRKD2,SLC9A6,SLIT2,STRAP,SULF1,TOB1,TRIM33,VEGFC,VWC2L,XPO1,ZEB1,ZFYVE9
GO.0060284	regulation of cell development	69	0.000167	ABL2,AKAP6,ARHGEF2,ATXN1,CAPRIN2,CDON,CNR1,CNTN1,CSF1,CUX1,DDX6,DIXDC1,EFNA1,EPB41L5,EPHB2,FRZB,FZD3,GCNT2,IGF1,IGLON5,ISL1,ITSN2,KIT,LMX1A,MACF1,MAGI2,MAP1B,MMD,MYCN,NACA,NCOA1,NEDD4,NFYA,NGFR,NOTCH1,NPTN,OPA1,PACSIN1,PDE3A,PLK2,POU3F2,PRKCI,RAP1A,RAPGEF2,RELN,RET,RFX3,RNF6,ROBO2,SCRT2,SEMA7A,SORL1,SOX5,SPP1,STK24,STRAP,SYT1,TCF4,TIMP2,TNIK,TNR,TRIOBP,ULK2,VEGFC,VWC2L,YWHAG,ZEB1,ZFHX3,ZNF536
GO.0043085	positive regulation of catalytic activity	111	0.00017	ABI1,ABL2,ACVR2B,ADCY1,ADCYAP1,AKAP6,ANAPC1,APH1B,APOC2,ARHGAP12,ARHGAP19,ARHGAP21,ARHGEF2,ATP1B1,BBC3,BMI1,BNIP2,CD4,CDKN1B,CHN2,COPS8,CRKL,CSF1,DDX3X,DENND1B,DENND4C,DENND5B,DLC1,EFNA1,EPHA4,EREG,ESR1,EVI5,FARP1,FARP2,FBXW7,FGFR2,FLT1,FOXJ1,GAB1,GIT2,GNAQ,GSK3B,IRS1,ITSN2,JUN,KIAA1432,KIT,KITLG,MAGI2,MAP2K4,MAP2K7,MAP3K9,MAP4K5,MAPK14,MAPK8IP3,MAPKAPK3,MASTL,MDFI,MET,MMD,MMP16,MOB1B,MON2,NDEL1,…
GO.0048646	anatomical structure formation involved in morphogenesis	84	0.000182	ABI1,ACVR1,ACVR2B,ADIPOR2,ATM,BCL2L11,CALB1,CAST,CD109,CDC73,CDON,CFL2,CLIC4,CNTNAP1,DLC1,DUSP1,E2F7,EFNA1,EFNB2,EGLN1,ELK3,ENAH,EPB41L5,EPHB2,EREG,ERVW-1,ESM1,FAM105B,FGF9,FLT1,FOXF1,FOXJ1,FZD3,GSK3B,HIPK1,HOXB1,ISL1,ITGA5,ITGAV,JUN,KDR,KIF16B,KLF5,MACF1,MAPK14,MEGF11,MEOX2,MKL1,MYPN,NAA15,NEBL,NKX3-1,NOG,NOTCH1,NR4A3,NRP2,ONECUT2,OPA1,PALB2,PCDH8,PDCD10,PDPN,PHACTR4,PIK3CA,PRKD2,PRKX,PTPN14,PTP…
GO.0048585	negative regulation of response to stimulus	104	0.000185	ABL2,ACVR1,APCDD1,ARHGEF2,ASH1L,ATXN1,BIRC6,BRCA1,CASK,CBL,CBLB,CD109,CNKSR3,CSNK1E,CTDSPL2,CYLD,DDX3X,DLC1,DNAJA1,DNAJC3,EPHA4,ESR1,FAIM,FAM105B,FBXW7,FGF9,FOXF1,FOXJ1,FRZB,GSK3B,HERPUD1,HHIP,HIC1,HIPK3,HMGXB4,IGF1,IL19,IRF4,IRS1,ISL1,ITGAV,KANK2,KNG1,MAGI2,MAPK14,MDFI,MET,MKL1,NEDD4,NGFR,NKX3-1,NLRC5,NOG,NOTCH1,ONECUT2,OPA1,PHACTR4,PHB,PHF14,PLCL2,PPP1CC,PRKAA2,PRKG1,PSAP,RAF1,RANBP9,RASA1,RASA…
GO.0050767	regulation of neurogenesis	57	0.000185	ABL2,ARHGEF2,ATXN1,CAPRIN2,CDON,CNR1,CNTN1,CSF1,CUX1,DDX6,DIXDC1,EPHB2,FZD3,GSK3B,IGLON5,ISL1,ITSN2,KIT,LMX1A,MACF1,MAGI2,MAP1B,MMD,MYCN,NCOA1,NEDD4,NGFR,NPTN,OPA1,PACSIN1,PLK2,POU3F2,PRKCI,RAP1A,RAPGEF2,RELN,RET,RNF6,ROBO2,SCRT2,SEMA7A,SORL1,SOX5,SPP1,STK24,SYT1,TCF4,TIMP2,TNIK,TNR,ULK2,VEGFC,VWC2L,YWHAG,ZEB1,ZFHX3,ZNF536
GO.0023056	positive regulation of signaling	112	0.000187	ABL2,ACVR1,ACVR2A,ACVR2B,ADAMTS3,ADCYAP1,AKAP6,ATM,BBC3,BCL2L11,BDNF,BVES,CA7,CAPRIN2,CBL,CD4,CDC73,CDON,CHN2,CLSTN2,CNTNAP1,COPS8,CREBRF,CRKL,CSF1,CSNK1E,CYLD,DGKI,DIXDC1,EFNA1,EPHA4,EREG,ESM1,FAM59A,FBXW7,FGF9,FGFR2,FLT1,GCNT2,GPR27,GRIN2B,GSK3B,HIC1,IGF1,IRS1,ISL1,ITGA5,ITSN2,KDR,KITLG,MACF1,MAP2K4,MAP2K7,MAP3K9,MAP4K5,MAPK14,MAPKAPK3,MDFI,MECP2,MET,MIER1,MTDH,NEDD4,NGFR,NKX3-1,NLRC5,NOTCH1,NP…
GO.0023014	signal transduction by protein phosphorylation	32	0.000205	ACVR1,ACVR2A,ACVR2B,CNTLN,CRKL,GAB1,IGF1,ITGAV,JUN,KDR,KIT,MAP2K4,MAP2K7,MAP3K9,MAP4K3,MAP4K5,MAPK14,MAPK8IP3,MAPKAPK3,MDFI,NDST1,PPP4C,RAPGEF2,RET,RPS6KA1,SH2D3C,SLK,STK24,TNIK,TYRO3,YWHAB,ZAK
GO.0051338	regulation of transferase activity	77	0.000213	ABI1,ACVR2B,ADCY1,ADCYAP1,ANAPC1,ATM,BMI1,CCNL1,CCNT2,CCNYL1,CD4,COPS8,CRKL,CSF1,DNAJA1,DNAJC3,DUSP1,EFNA1,EIF4A2,EPHA4,EREG,FBXW7,FEM1B,FGFR1OP,FLT1,GAB1,GNAQ,GSK3B,HIPK3,IRS1,KIT,KITLG,MAP2K4,MAP2K7,MAP3K9,MAP4K5,MAPK14,MAPK8IP3,MAPKAPK3,MASTL,MDFI,MET,MMD,NKX3-1,NLRC5,NR2F2,PDCD10,PIK3CA,PPM1F,PRLR,RAF1,RAP1A,RAP2C,RAPGEF2,RELN,SASH1,SLK,SOCS5,SOCS6,SORL1,SPDYE1,SPDYE2,SPDYE3,SPRED2,STK24,TENM…
GO.0031401	positive regulation of protein modification process	87	0.000214	ABI1,ABL2,ACVR1,ACVR2A,ACVR2B,ADCY1,ADCYAP1,AKAP6,ANAPC1,ARHGEF2,BDNF,BMI1,BRCA1,CAPRIN2,CDON,CLIP3,CNEP1R1,COPS8,CRKL,CSF1,DLC1,EPHA4,EREG,FAM59A,FBXW7,FGF9,FGFR2,FLT1,FNIP2,GAB1,GCNT2,GSK3B,IGF1,ISL1,ITGA5,JARID2,KDR,KIT,KITLG,MAGI2,MAP2K4,MAP2K7,MAP3K9,MAP4K5,MAPK14,MAPK8IP3,MAPKAPK3,MASTL,MDFI,MET,MMD,MTF2,NGFR,NKX3-1,NPNT,NPTN,PDCD10,PHB,PIK3CA,PPAP2B,PRKD2,PRLR,PSAP,RAF1,RAP1A,RAP1B,RAP2C,R…
GO.0048638	regulation of developmental growth	34	0.000222	AKAP6,ARX,ATRN,BCL2L11,BDNF,CSF1,FGF9,FGFR2,GPAM,GSK3B,IGF1,IKZF1,ITSN2,KCNK2,MACF1,MAP1B,MAPK14,NACA,NDEL1,NOG,NOTCH1,NRK,PIK3CA,POU3F2,RNF6,RPS6KB1,SEMA7A,SLIT2,SPP1,SPR,SYT1,TNR,ULK2,WWC2
GO.0009967	positive regulation of signal transduction	103	0.00023	ABL2,ACVR1,ACVR2A,ACVR2B,ADAMTS3,ADCYAP1,AKAP6,ATM,BBC3,BCL2L11,BDNF,CAPRIN2,CBL,CD4,CDC73,CDON,CHN2,CNTNAP1,COPS8,CREBRF,CRKL,CSF1,CSNK1E,CYLD,DGKI,DIXDC1,EFNA1,EPHA4,EREG,ESM1,FAM59A,FBXW7,FGF9,FGFR2,FLT1,GCNT2,GPR27,GSK3B,HIC1,IGF1,IRS1,ISL1,ITGA5,ITSN2,KDR,KITLG,MACF1,MAP2K4,MAP2K7,MAP3K9,MAP4K5,MAPK14,MAPKAPK3,MDFI,MET,MIER1,MTDH,NEDD4,NGFR,NKX3-1,NLRC5,NOTCH1,NPNT,NPTN,NRK,PDCD10,PHB,PLAGL2…
GO.0001525	angiogenesis	36	0.000231	ACVR1,ADIPOR2,CLIC4,E2F7,EFNA1,EFNB2,ELK3,EPHB2,EREG,ESM1,FAM105B,FGF9,FGFR2,FLT1,ITGA5,ITGAV,JUN,KDR,KLF5,MAPK14,MEOX2,MKL1,NAA15,NOTCH1,NRP2,PDCD10,PIK3CA,PRKD2,PRKX,PTPRB,RORA,S1PR1,SETD2,SLIT2,TGFA,VEGFC
GO.0065008	regulation of biological quality	201	0.000231	A1CF,ABL2,ACVR2B,ADCY1,ADIPOR2,AKAP6,ANK3,ANKRD13C,APLNR,APOC2,ARHGAP21,ARID4A,ASIC1,ATM,ATP13A4,ATP1B1,ATP2B1,ATP6V1C1,ATXN1,BAI3,BBC3,BCL2L11,BDNF,BRWD3,BVES,CALB1,CASK,CASR,CD4,CDC73,CLIC4,CLSTN2,CNOT6L,CNR1,COL4A3BP,CRTAP,CSF1,CSNK1E,CUL5,DGKA,DGKH,DLC1,DNA2,DNAJC16,EGLN1,EIF5A2,FBXW7,FLI1,FLRT3,FTH1,GAS7,GCNT2,GJC1,GLS,GNAI3,GNAQ,GOPC,GPAM,GRIA1,GRIK3,GRIN2B,GSK3B,GUCY1A2,H3F3B,HEBP2,HERPUD1…
GO.0045664	regulation of neuron differentiation	49	0.000232	ABL2,CAPRIN2,CDON,CNR1,CNTN1,CUX1,DDX6,DIXDC1,EPHB2,GSK3B,ISL1,ITSN2,LMX1A,MACF1,MAGI2,MAP1B,MMD,NCOA1,NEDD4,NGFR,NOG,NOTCH1,NPTN,OPA1,PACSIN1,PLK2,POU3F2,PRKCI,RAP1A,RAPGEF2,RELN,RET,RNF6,ROBO2,SEMA7A,SOX5,SPP1,STK24,SYT1,TCF4,TIMP2,TNIK,TNR,ULK2,VWC2L,YWHAG,ZEB1,ZFHX3,ZNF536
GO.0044708	single-organism behavior	43	0.000271	ABL2,ADCY1,ASIC1,ATXN1,BDNF,CACNB4,CALB1,CASR,CHL1,CLCN3,CNR1,DGKI,DMRT3,EPHA4,EPHB2,FBXL20,GIT2,GRIA1,GRIN2D,ITGA5,JUN,KCNJ10,KCNK10,KCNK2,KIT,MECP2,MET,NLGN4X,NR4A3,OXR1,PAIP2,PDE8B,PLK2,RCAN2,RELN,RPS6KB1,SCN8A,SLC6A1,SLITRK1,TMOD2,TNR,UBR3,ZNF385A
GO.0009968	negative regulation of signal transduction	87	0.000299	ABL2,ACVR1,APCDD1,ARHGEF2,ASH1L,ATXN1,BIRC6,BRCA1,CBL,CBLB,CD109,CNKSR3,CSNK1E,CTDSPL2,CYLD,DDX3X,DLC1,DNAJA1,ESR1,FAIM,FBXW7,FGF9,FRZB,GSK3B,HERPUD1,HHIP,HIC1,HIPK3,HMGXB4,IGF1,IL19,IRF4,IRS1,ISL1,ITGAV,KANK2,MAGI2,MAPK14,MDFI,MKL1,NEDD4,NGFR,NKX3-1,NLRC5,NOG,NOTCH1,ONECUT2,OPA1,PHACTR4,PHB,PHF14,PLCL2,PPP1CC,PRKAA2,RAF1,RANBP9,RASA1,RASA2,RORA,SCAI,SCRT2,SLIT2,SOCS5,SOCS6,SOCS7,SOD2,SORL1,SPRED…
GO.0034641	cellular nitrogen compound metabolic process	319	0.000303	A1CF,ADCY1,AFF2,AFF3,AFF4,AK4,ALDH4A1,ALX4,ARID2,ARID4B,ARX,ASH1L,ATXN1,ATXN1L,ATXN7L3,BAZ2B,BCORL1,BDNF,BHLHE40,BMI1,C7orf60,CACNB4,CASC3,CASK,CASZ1,CBFB,CBX3,CCNL1,CCNT2,CDC73,CDK13,CDS1,CDYL,CERS6,CHD9,CHTF8,CNOT6,CNOT6L,COL4A3BP,COPS2,CPEB1,CREB5,CREBRF,CSNK1E,CTCFL,CTU1,CUX1,DACH1,DCP2,DDX3X,DDX6,DMRT3,DNA2,E2F7,EIF2C2,EIF2C3,EIF2C4,EIF2S2,EIF4A2,EIF4E2,EIF5A2,EIF5B,ELAVL4,ELK3,ELL2,EREG,ESR…
GO.0007173	epidermal growth factor receptor signaling pathway	28	0.000304	ABL2,ADAM10,ADCY1,CBL,CDKN1B,EIF2C2,EIF2C3,EIF2C4,EREG,FAM59A,FGF9,FGFR2,FOXO4,GAB1,GSK3B,IRS1,KIF16B,KIT,KITLG,PIK3CA,RAF1,REPS2,RICTOR,SOCS5,SOS1,TGFA,TNRC6A,YWHAB
GO.0030900	forebrain development	39	0.000308	ARX,BTBD3,CDON,CUL5,DIXDC1,DLC1,EPHB2,FGFR2,GNAQ,GSK3B,IKZF1,ISL1,LMX1A,LRP2,MAPK8IP3,NCOA1,NDEL1,NDST1,NOG,NOTCH1,NR2F2,NR4A3,PGAP1,POU3F2,PRKG1,RAPGEF2,RELN,ROBO2,SATB2,SEMA7A,SETD2,SLC8A1,SLIT2,SOCS7,TNR,TOP2B,TSC1,TTC21B,TYRO3
GO.0035295	tube development	56	0.000322	ACVR1,ACVR2B,ALX4,ATXN1,ATXN1L,BCL2L11,BDNF,C6orf170,CALB1,CLIC4,CSF1,CUX1,DLC1,EFNB2,ENAH,EPB41L5,EPHA4,ESR1,FBXW7,FGF9,FOXF1,FOXJ1,FZD3,HECA,HHIP,HOXA5,IGF1,KDR,KIT,KLF5,LOX,MAPK8IP3,MET,MKL1,MYCN,NKX3-1,NOG,NOTCH1,NPNT,NR4A3,OPA1,PHACTR4,PHF14,PRKD2,PRKX,RC3H2,ROBO2,SETD2,SLC8A1,SP1,TBX18,TMBIM6,TSC1,ZEB1,ZFP36L1,ZFPM2
GO.0060429	epithelium development	82	0.000348	ABI1,ACVR1,ACVR2B,ALX4,APCDD1,ARHGAP12,ARID4A,ARID4B,ARX,ATM,BDNF,C6orf170,CALB1,CD109,CSF1,CUX1,DLC1,E2F7,EFNB2,ENAH,EPB41L5,EPHA4,EREG,ESR1,FEM1B,FOXF1,FOXJ1,FRMD6,FRZB,FZD3,GAB1,HHIP,HOXA5,IGF1,ITGA5,JUN,KIT,KLF5,KRT76,LDB2,MAGI2,MAP3K1,MEOX2,MET,MKL1,MSN,MYCN,NGFR,NOG,NOTCH1,NPNT,NR2F2,NR5A2,ONECUT2,OPA1,OTX2,PALB2,PCDH8,PDCD10,PHACTR4,POU3F2,PRKD2,PRKX,PRLR,PSAP,RAP1A,RAP1B,RAP2C,RAPGEF2,RET…
GO.0006796	phosphate-containing compound metabolic process	131	0.000456	ABI1,ABI2,ABL2,ACVR1,ACYP2,ADAM10,ADCY1,AK4,ATM,BDNF,BIRC6,BMP2K,CACNB4,CASK,CDK13,CDK17,CDK19,CDS1,CNTLN,COL4A3BP,CRKL,CSNK1E,CTDSP2,CTDSPL2,DCX,DGKA,DGKH,DGKI,EPHA4,EPHB2,EYA4,FGFR1OP,FGFR2,FLT1,FNIP2,GAB1,GARS,GMPS,GPAM,GPD2,GSK3B,GUCY1A2,HIPK1,HIPK3,IGF1,ITGAV,JUN,KDR,LPPR4,MAP2K4,MAP2K7,MAP3K9,MAP4K3,MAP4K4,MAP4K5,MAPK14,MAPK8IP3,MAPKAPK3,MASTL,MDFI,MECP2,MEX3B,MINPP1,MMD,MOB1B,N4BP2,NAMPT,N…
GO.0006807	nitrogen compound metabolic process	335	0.000476	A1CF,ADCY1,AFF2,AFF3,AFF4,AK4,ALDH4A1,ALX4,ARID2,ARID4B,ARX,ASH1L,ATXN1,ATXN1L,ATXN7L3,B3GNT1,B4GALT5,BAZ2B,BCORL1,BDNF,BHLHE40,BMI1,C7orf60,CACNB4,CASC3,CASK,CASZ1,CBFB,CBX3,CCNL1,CCNT2,CDC73,CDK13,CDS1,CDYL,CERS6,CHD9,CHST1,CHSY3,CHTF8,CNOT6,CNOT6L,COPS2,CPEB1,CREB5,CREBRF,CRTAP,CSNK1E,CTCFL,CTU1,CUX1,DACH1,DCP2,DDX3X,DDX6,DMRT3,DNA2,DSEL,E2F7,EGLN1,EIF2C2,EIF2C3,EIF2C4,EIF2S2,EIF4A2,EIF4E2,EIF…
GO.0008543	fibroblast growth factor receptor signaling pathway	24	0.000509	ADCY1,CBL,CDKN1B,EIF2C2,EIF2C3,EIF2C4,EREG,FGF9,FGFR2,FOXO4,GAB1,GSK3B,IRS1,KIF16B,KIT,KITLG,NDST1,NOG,PIK3CA,RAF1,RICTOR,SOS1,TNRC6A,YWHAB
GO.0048011	neurotrophin TRK receptor signaling pathway	34	0.000509	ADCY1,ADCYAP1,APH1B,ARHGEF2,BCL2L11,CDKN1B,CRKL,EIF2C2,EIF2C3,EIF2C4,EREG,FGF9,FGFR2,FOXO4,GAB1,GSK3B,IRS1,KIT,KITLG,MAPK14,MAPKAPK3,NGFR,NGFRAP1,PIK3CA,PRKCI,RAF1,RAP1A,RICTOR,RPS6KA1,SORT1,SOS1,SOS2,TNRC6A,YWHAB
GO.0003002	regionalization	37	0.000546	ABI1,ACVR2A,ACVR2B,ALX4,ATM,BMI1,C6orf170,CDON,CRKL,DMRT3,EPB41L5,FGFR2,FOXF1,FOXJ1,HHIP,HIPK1,HOXA5,HOXB1,ISL1,LMX1B,LRP2,MDFI,MEOX2,MTF2,NKX3-1,NOG,NOTCH1,NR2F2,PALB2,PCDH8,PGAP1,RELN,TBX18,TSHZ1,TTC21B,VANGL2,YY1
GO.0009987	cellular process	662	0.000555	A1CF,ABI2,ABL2,ACOT11,ACTR6,ACVR1,ACVR2A,ACVR2B,ACYP2,ADAM10,ADAMTS3,ADAMTS5,ADCYAP1,ADD3,ADIPOR2,AFF2,AFF3,AGL,AK4,AKAP6,ALDH4A1,ALG9,ALX4,AMFR,ANAPC1,ANK3,ANKRD13C,APBA2,APCDD1,APH1B,APLNR,APOC2,APPL1,ARHGAP12,ARHGAP19,ARHGAP21,ARHGEF2,ARID2,ARIH1,ARL10,ARL5A,ARL6IP1,ARX,ATM,ATP1B1,ATRN,ATXN1L,ATXN7L3,B4GALT5,BAG2,BAI3,BAZ2B,BBC3,BCORL1,BHLHE40,BMI1,BMP2K,BNIP2,BRCA1,BRWD3,BTBD3,BVES,C6orf170,C…
GO.0034773	histone H4-K20 trimethylation	4	0.000555	ARID4A,ARID4B,SUV420H1,SUV420H2
GO.0045597	positive regulation of cell differentiation	70	0.000555	ABL2,ACVR1,ACVR2A,ACVR2B,AKAP6,ATXN1,BDNF,BNIP2,CAPRIN2,CNR1,CNTN1,CSF1,CUX1,EFNB2,EPB41L5,EPHA4,EPHB2,FOXJ1,FRZB,FZD3,GCNT2,GSK3B,HOXA5,IGF1,IKZF1,ITSN2,KDR,KIT,KITLG,KLF10,KLF5,LHX1,MACF1,MAGI2,MAP1B,MMD,NCOA1,NDEL1,NGFR,NOTCH1,NPNT,NPTN,OPA1,PACSIN1,PDE3A,PRKCI,RAP1A,RAPGEF2,RELN,RET,RFX3,ROBO2,RPS6KA1,SEMA7A,SLIT2,SMAP1,SOCS5,SOX5,SYT1,TCF4,TIMP2,TRIOBP,VEGFC,VWC2L,WIF1,ZEB1,ZEB2,ZFHX3,ZNF268…
GO.0034770	histone H4-K20 methylation	5	0.000577	ARID4A,ARID4B,SUV420H1,SUV420H2,WHSC1
GO.0050769	positive regulation of neurogenesis	39	0.000637	ABL2,ATXN1,BDNF,CAPRIN2,CDON,CNR1,CNTN1,CSF1,CUX1,EPHA4,EPHB2,FZD3,GSK3B,ITSN2,KIT,MACF1,MAGI2,MAP1B,MMD,NCOA1,NDEL1,NGFR,NPTN,OPA1,PACSIN1,PRKCI,RAP1A,RAPGEF2,RELN,RET,ROBO2,SEMA7A,SLIT2,SYT1,TCF4,TIMP2,VEGFC,VWC2L,ZEB1
GO.0040007	growth	43	0.000673	ACVR2B,APBA2,BDNF,CLIC4,COL27A1,CSF1,DCX,EPB41L5,EREG,ESR1,FGFR2,GPD2,HOXA5,IGF1,ITGAV,LHX1,MAGI2,MAP1B,MAPK14,NACA,NDEL1,NLGN4X,NOTCH1,NRP2,PALB2,PRLR,PSAP,PTPN12,RC3H2,RTF1,S1PR1,SEMA7A,SGMS1,SLC25A25,SLC9A6,SLITRK1,SOCS5,TBL1XR1,TIMP3,ULK2,VANGL2,VPS54,ZFP36L1
GO.0046777	protein autophosphorylation	26	0.000689	ABL2,ATM,DCX,EPHA4,FGFR2,FLT1,GSK3B,KDR,KIT,MAP3K9,MAPK14,MAPKAPK3,MET,MEX3B,MOB1B,NEK2,PEAK1,PRKD2,PRKX,SLK,STK24,TNIK,TYRO3,UHMK1,ULK2,WNK3
GO.0010720	positive regulation of cell development	46	0.000739	ABL2,AKAP6,ATXN1,BDNF,CAPRIN2,CDON,CNR1,CNTN1,CSF1,CUX1,EPB41L5,EPHA4,EPHB2,FZD3,GCNT2,GSK3B,ITSN2,KIT,MACF1,MAGI2,MAP1B,MMD,NCOA1,NDEL1,NGFR,NOTCH1,NPTN,OPA1,PACSIN1,PDE3A,PRKCI,RAP1A,RAPGEF2,RELN,RET,RFX3,ROBO2,SEMA7A,SLIT2,SYT1,TCF4,TIMP2,TRIOBP,VEGFC,VWC2L,ZEB1
GO.0080135	regulation of cellular response to stress	64	0.000749	ARHGEF2,ATM,ATP1B1,BAG2,BBC3,BCL2L11,BRCA1,CA7,CREBRF,DIXDC1,DNAJA1,DNAJC3,DZANK1,FBXW7,FEM1B,FIGN,GAB1,GSK3B,HERPUD1,HIC1,HIPK3,KCNK2,KIAA0146,MAP2K4,MAP2K7,MAP3K1,MAP3K9,MAP4K4,MAP4K5,MDFI,MET,NDEL1,NKX3-1,NRK,NUP153,OPA1,PDCD10,PIK3CA,PMAIP1,PPP4C,PPP4R2,PRKAA2,PRKD2,PRKG1,PSAP,RIMS3,SASH1,SCFD1,SLC6A1,SOD2,SPP1,SPRED2,STK24,TMBIM6,TNIK,TNR,UBE2N,UBR5,VANGL2,WHSC1,YOD1,ZAK,ZNF385A,ZNF675
GO.0048584	positive regulation of response to stimulus	136	0.000802	ABI1,ABL2,ACVR1,ACVR2A,ACVR2B,ADAM10,ADAMTS3,ADCYAP1,AKAP6,ATM,ATP1B1,BBC3,BCL2L11,BDNF,BRCA1,CA7,CACNB4,CAPRIN2,CBL,CDC73,CDK19,CDON,CHN2,CNR1,CNTNAP1,COPS8,CREBRF,CRKL,CSF1,CSNK1E,CYLD,DGKI,DIXDC1,DZANK1,EFNA1,ENAH,EPHA4,EREG,ESM1,FAM105B,FAM59A,FBXW7,FGF9,FGFR2,FLT1,GCNT2,GPR27,GSK3B,HERPUD1,HIC1,IGF1,IL16,IRS1,ISL1,ITGA5,ITSN2,JUN,KCNK2,KDR,KIAA0146,KITLG,MACF1,MAP2K4,MAP2K7,MAP3K9,MAP4K5,MAP…
GO.0038095	Fc-epsilon receptor signaling pathway	24	0.00082	CDKN1B,EIF2C2,EIF2C3,EIF2C4,EREG,FGF9,FGFR2,FOXO4,GAB1,GSK3B,IRS1,JUN,KIT,KITLG,MAP2K4,MAP2K7,MAP3K1,PIK3CA,RAF1,RICTOR,SOS1,TNRC6A,UBE2N,YWHAB
GO.0043506	regulation of JUN kinase activity	15	0.000824	DNAJA1,EPHA4,GAB1,HIPK3,MAP2K4,MAP2K7,MAP3K1,MAP3K9,MAP4K5,MAPK8IP3,MDFI,SASH1,VANGL2,ZAK,ZNF675
GO.0043408	regulation of MAPK cascade	56	0.000854	ABL2,ADCYAP1,ASH1L,CDON,CNKSR3,CRKL,DIXDC1,DNAJA1,EFNA1,EPHA4,EREG,FAM59A,FBXW7,FGF9,FGFR2,FLT1,GAB1,GCNT2,HIPK3,KDR,KIT,KITLG,MAP2K4,MAP2K7,MAP3K9,MAP4K4,MAP4K5,MAPK14,MAPKAPK3,MDFI,MET,NGFR,NPNT,NRK,PDCD10,PHB,PRKD2,PSAP,RAF1,RANBP9,RAP1A,RAP1B,RAPGEF2,SASH1,SEMA7A,SORL1,SPRED2,STYX,TENM1,TGFA,TIMP2,TNIK,VANGL2,YWHAB,ZAK,ZNF675
GO.0048015	phosphatidylinositol-mediated signaling	21	0.000888	CDKN1B,EIF2C2,EIF2C3,EIF2C4,EREG,FGF9,FGFR2,FOXO4,GAB1,GSK3B,IGF1,IRS1,KIT,KITLG,PI4KB,PIK3CA,PLCH1,RICTOR,RPS6KB1,TNRC6A,TYRO3
GO.0007611	learning or memory	27	0.000949	ABL2,ADCY1,ASIC1,ATXN1,BDNF,CALB1,CNR1,DGKI,EPHB2,GRIA1,ITGA5,JUN,KCNK10,KCNK2,KIT,MECP2,NLGN4X,PAIP2,PDE8B,PLK2,RCAN2,RELN,RPS6KB1,SLC6A1,TMOD2,TNR,ZNF385A
GO.0045666	positive regulation of neuron differentiation	33	0.000949	ABL2,BDNF,CAPRIN2,CDON,CNR1,CNTN1,CUX1,EPHA4,GSK3B,ITSN2,MACF1,MAGI2,MAP1B,MMD,NCOA1,NDEL1,NGFR,NPTN,OPA1,PACSIN1,PRKCI,RAP1A,RAPGEF2,RELN,RET,ROBO2,SEMA7A,SLIT2,SYT1,TCF4,TIMP2,VWC2L,ZEB1
GO.0042127	regulation of cell proliferation	110	0.000968	ABI1,ABL2,ADAM10,ARHGEF2,ARX,ATM,ATXN1,ATXN1L,BAP1,BDNF,BMI1,BRCA1,CASK,CBLB,CD109,CDC73,CDK13,CDON,CNOT6,CNOT6L,COPS8,CRKL,CSF1,CUL5,DACH1,DLC1,E2F7,EFNB2,EIF2C3,EIF5A2,EREG,ESM1,ESR1,FAM59A,FBXW7,FGFR1OP,FLT1,FOSL2,FOXF1,FOXJ1,FOXO4,FRZB,FTH1,FZD3,GCNT2,GPAM,HIPK1,HOXA5,IGF1,IRF1,IRS1,ISL1,ITGAV,JARID2,KANK2,KCNK2,KITLG,KLF10,KLF9,LHX1,MAGI2,MAPK14,MECP2,MYCN,NACA,NFYA,NGFR,NKX3-1,NOTCH1,NR2F2,…
GO.0006349	regulation of gene expression by genetic imprinting	7	0.00102	ARID4A,ARID4B,BRCA1,CTCFL,DNMT3A,GSK3B,MECP2
GO.0060560	developmental growth involved in morphogenesis	18	0.00103	BDNF,COL27A1,CSF1,DCX,EPB41L5,ESR1,FGFR2,LHX1,MAGI2,MAP1B,NDEL1,NOTCH1,NRP2,S1PR1,SEMA7A,SLC9A6,ULK2,VANGL2
GO.0030323	respiratory tube development	25	0.00107	ACVR2B,ATXN1,ATXN1L,CUX1,FBXW7,FGF9,FGFR2,FOXF1,FOXJ1,HECA,HHIP,HOXA5,IGF1,KDR,LOX,MAPK8IP3,MYCN,NOG,NOTCH1,PHF14,RC3H2,SP1,TMBIM6,VANGL2,ZFPM2
GO.0010647	positive regulation of cell communication	116	0.00109	ABL2,ACVR1,ACVR2A,ACVR2B,ADAMTS3,ADCYAP1,AKAP6,ATM,ATP1B1,BBC3,BCL2L11,BDNF,CAPRIN2,CBL,CD4,CDC73,CDON,CHN2,CLSTN2,CNTNAP1,COPS8,CREBRF,CRKL,CSF1,CSNK1E,CYLD,DGKI,DIXDC1,DZANK1,EFNA1,EPHA4,EREG,ESM1,FAM59A,FBXW7,FGF9,FGFR2,FLT1,GCNT2,GPR27,GRIN2B,GSK3B,HIC1,IGF1,IRS1,ISL1,ITGA5,ITSN2,KDR,KITLG,MACF1,MAP2K4,MAP2K7,MAP3K9,MAP4K5,MAPK14,MAPKAPK3,MDFI,MECP2,MET,MIER1,MTDH,NEDD4,NGFR,NKX3-1,NLRC5,NOTC…
GO.0051726	regulation of cell cycle	78	0.00109	ADCYAP1,ANAPC1,ANLN,ATM,BAP1,BCL2L11,BIRC6,BRCA1,CAST,CCNL1,CCNT2,CCNYL1,CDC73,CDK13,CDK17,CDK19,CTDSP2,CUL5,CYLD,DACH1,DDX3X,DST,DUSP1,E2F7,EREG,ESPL1,FBXO43,FBXW7,FEM1B,FZD3,GAS2L3,GAS7,HBP1,IGF1,IRF1,JUN,KANK2,KIAA0101,KIF11,MACF1,MAGI2,MAP3K1,MASTL,MDM4,NABP1,NEK2,NGFR,NKX3-1,NR2F2,NR4A3,NRK,PDE3A,PDPN,PHACTR4,PKP4,PLK2,PRKAA2,PRPF40A,RPS6KB1,SESN1,SLK,STAG2,STK24,TGFA,THAP1,TIMP2,TOP2B,TRIM3…
GO.0009887	organ morphogenesis	73	0.00124	ACVR1,ACVR2B,ALX4,BCL2L11,CALB1,CDON,COL27A1,COL4A3BP,CRKL,CSF1,DLC1,EFNA1,EFNB2,EGLN1,EREG,ESR1,FEM1B,FGF9,FGFR2,FLI1,FOXF1,FOXJ1,FRZB,FZD3,GSK3B,HHIP,HIPK1,HOXA5,HOXB1,IGF1,INSIG1,ISL1,JUN,LHX9,MAPK14,MAPK8IP3,MDFI,MEGF11,MKL1,MKL2,MMP16,MYCN,NAB1,NDST1,NEDD4,NKX3-1,NOG,NOTCH1,NPNT,NR4A3,NR5A2,ONECUT2,OTX2,PALB2,PAX5,PHACTR4,PRKCI,PRKX,RPS6KA1,S1PR1,SATB2,SETD2,SLC8A1,SLIT2,SP1,TBX18,TGFA,TSHZ1…
GO.0044344	cellular response to fibroblast growth factor stimulus	25	0.00127	ADCY1,CBL,CDKN1B,EIF2C2,EIF2C3,EIF2C4,EREG,FGF9,FGFR2,FOXO4,GAB1,GSK3B,IRS1,KIF16B,KIT,KITLG,LHX1,NDST1,NOG,PIK3CA,RAF1,RICTOR,SOS1,TNRC6A,YWHAB
GO.0048568	embryonic organ development	44	0.00156	ACVR1,ALX4,BIRC6,E2F7,EFNA1,EGLN1,EPHB2,FGF9,FGFR2,FOXF1,FRZB,FZD3,GAB1,HIPK1,HOXA5,HOXB1,INSIG1,IRX5,KDR,KIT,KITLG,LHX1,MDFI,MKL2,MMP16,MYCN,NCOA1,NDST1,NOG,NOTCH1,NR2F2,NR4A3,OTX2,PHACTR4,SATB2,SETD2,SIX4,SLC8A1,SP1,TBX18,TSHZ1,ZEB1,ZFP36L1,ZFPM2
GO.0048286	lung alveolus development	11	0.00165	ATXN1,ATXN1L,FGFR2,FOXF1,HOXA5,IGF1,KDR,MAPK8IP3,PDPN,PHF14,RC3H2
GO.0008285	negative regulation of cell proliferation	58	0.00181	ABI1,ATM,BAP1,BDNF,CASK,CBLB,CD109,CDC73,COPS8,CUL5,DACH1,DLC1,E2F7,EFNB2,EREG,FBXW7,FGFR2,FOXJ1,FOXO4,FRZB,FTH1,IGF1,IRF1,JARID2,JUN,KANK2,KCNK2,KLF10,KLF9,MAGI2,MDM4,NKX3-1,NOG,NOTCH1,NR2F2,NRK,PDCD10,PHB,PHF14,PMAIP1,PTPN14,RAF1,RAPGEF2,RC3H1,SESN1,SLIT2,SMARCA2,SOD2,STRAP,STRN,SULF1,TENM1,TIMP2,TOB1,TSC1,VEGFC,ZEB1,ZNF268
GO.0051649	establishment of localization in cell	125	0.00192	ACVR2B,AKAP6,ANK3,APPBP2,ARFIP1,ARHGAP21,ARL6IP1,ATP1B1,ATXN1,BBC3,BCL2L11,BDNF,CASK,CBLB,CBLN4,CLINT1,CLIP1,CLVS2,COL4A3BP,CUX1,DGKI,ENAH,ESPL1,EVI5,EXOC5,FAM18B1,FAM18B2,FGF9,FGFR2,FTH1,GLS,GOLGA1,GOPC,GPAM,GSK3B,HEBP2,HERPUD1,HMGXB4,HOOK1,IGF1,IPO7,IPO8,JUN,KIAA1432,KIF16B,KIT,KNG1,KPNA5,LMAN1,LMAN2L,LRBA,MAGI2,MAP1B,MECP2,MIA3,MICAL3,MON2,NCBP2,NEDD4,NGFR,NMT2,NOTCH1,NPTX1,NRBP1,NUP153,OPA1,P…
GO.0045860	positive regulation of protein kinase activity	43	0.00193	ABI1,ACVR2B,ADCY1,ADCYAP1,CD4,COPS8,CRKL,CSF1,EFNA1,EPHA4,EREG,FBXW7,FLT1,GAB1,KIT,KITLG,MAP2K4,MAP2K7,MAP3K9,MAP4K5,MAPK14,MAPK8IP3,MAPKAPK3,MDFI,MET,MMD,NKX3-1,PDCD10,PIK3CA,PRLR,RAF1,RAP1A,RAPGEF2,RELN,SASH1,SLK,STK24,TENM1,TGFA,TNIK,VANGL2,YWHAB,ZAK
GO.0006793	phosphorus metabolic process	130	0.00194	ABI1,ABI2,ABL2,ACVR1,ACYP2,ADAM10,ADCY1,AK4,ATM,BDNF,BIRC6,BMP2K,CACNB4,CASK,CDK13,CDK17,CDK19,CDS1,CNTLN,COL4A3BP,CRKL,CSNK1E,CTDSP2,CTDSPL2,DCX,DGKA,DGKH,DGKI,EPHA4,EPHB2,EYA4,FGFR1OP,FGFR2,FLT1,FNIP2,GAB1,GARS,GMPS,GPD2,GSK3B,GUCY1A2,HIPK1,HIPK3,IGF1,ITGAV,JUN,KDR,LPPR4,MAP2K4,MAP2K7,MAP3K9,MAP4K3,MAP4K4,MAP4K5,MAPK14,MAPK8IP3,MAPKAPK3,MASTL,MDFI,MECP2,MEX3B,MINPP1,MMD,MOB1B,N4BP2,NAMPT,NDST1,…
GO.0016568	chromatin modification	50	0.00195	ACTR6,ARID2,ARID4A,ARID4B,ASH1L,ATM,ATXN7L3,BAP1,BCORL1,BMI1,CBX3,CDC73,CDYL,CENPO,CHD9,CTCFL,DNMT3A,ESR1,EYA4,HMGXB4,IKZF1,IRF4,JARID2,JHDM1D,MECP2,MLL3,MSL1,MSL2,MTF2,NCOA1,PHB,PHF2,PHF20,PPM1F,PRKAA2,RSF1,RTF1,RUVBL2,RYBP,SATB2,SETD2,SMARCA2,SUV420H2,TBL1XR1,TOX,UBE2N,USP49,WDR92,WHSC1,YEATS2
GO.0043087	regulation of GTPase activity	50	0.00195	ADCYAP1,ARHGAP12,ARHGAP19,ARHGAP21,ARHGEF2,BNIP2,BVES,CHN2,CPEB2,DENND1B,DENND4C,DENND5B,DGKI,DLC1,EPHA4,EVI5,FARP1,FARP2,FICD,FOXJ1,GIT2,GNAQ,GSK3B,ITSN2,JUN,KIAA1432,MON2,NDEL1,PKP4,PRKG1,PSD3,RALGAPA1,RANGRF,RAP1A,RAPGEF2,RASA1,RASA2,RGL1,RICTOR,S1PR1,SH2D3C,SLIT2,SMAP1,SNX18,SOS1,SOS2,SYDE1,TBC1D12,TSC1,USP6NL
GO.0030324	lung development	24	0.00199	ACVR2B,ATXN1,ATXN1L,CUX1,FBXW7,FGF9,FGFR2,FOXF1,FOXJ1,HHIP,HOXA5,IGF1,KDR,LOX,MAPK8IP3,MYCN,NOG,NOTCH1,PHF14,RC3H2,SP1,TMBIM6,VANGL2,ZFPM2
GO.0033043	regulation of organelle organization	86	0.00201	ABI2,ABL2,ANAPC1,ANLN,ARFIP1,ARHGEF2,ATM,ATP1B1,BAP1,BBC3,BCL2L11,BRCA1,CA7,CAMSAP2,CDK13,CDKN1B,CFL2,CLIC4,CLIP1,CLIP3,CNOT6,CNOT6L,CTCFL,CYLD,DIXDC1,DLC1,DZANK1,EREG,ESPL1,FBXO43,FBXW7,FGFR2,GSK3B,IGF1,INSIG1,ISL1,JARID2,KIF11,KIRREL,LMAN1,MAP3K1,MAPRE1,MECP2,MIER1,MSN,MTF2,NBPF3,NEK2,PAN3,PAX5,PDE3A,PHF2,PIK3CA,PLAGL2,PLK2,PMAIP1,PPFIA1,PPM1F,PRKD2,PRKG1,RASA1,RIMS3,RTF1,RUVBL2,S1PR1,SCFD1,SLC…
GO.0072091	regulation of stem cell proliferation	16	0.00204	ATXN1L,BDNF,EIF2C3,FGF9,FGFR2,FOXF1,FZD3,IRS1,KDR,MYCN,NFYA,NOTCH1,PHF14,TBX18,VEGFC,ZEB1
GO.0040008	regulation of growth	56	0.00238	ADAM10,ADIPOR2,AKAP6,ARX,ATRN,BAP1,BBC3,BCL2L11,BDNF,CAPRIN2,CDKN1B,CSF1,DCUN1D3,DDX3X,ESM1,FGF9,FGFR1OP,FGFR2,FRZB,GPAM,GSK3B,H3F3B,H3F3C,IGF1,IKZF1,ITSN2,KCNK2,LMX1A,MACF1,MAP1B,MAPK14,NACA,NDEL1,NOG,NOTCH1,NRK,PHB,PIK3CA,POU3F2,PPM1F,RNF6,RPS6KA1,RPS6KB1,RUVBL2,SEMA7A,SLIT2,SMARCA2,SOCS5,SOCS6,SOCS7,SPP1,SPR,SYT1,TNR,ULK2,WWC2
GO.0008154	actin polymerization or depolymerization	10	0.0024	ABI1,ABI2,CFL2,DIAPH2,ENAH,GAS7,MICAL3,WASF3,WASL,WIPF1
GO.0048193	Golgi vesicle transport	28	0.00269	ANK3,CLINT1,CLVS2,CUX1,EXOC5,FTH1,GOLGA1,GOPC,KIF16B,LMAN1,LMAN2L,MACF1,MON2,NRBP1,PRKCI,RANGRF,SCFD1,SEC22A,SEC23A,SEC24A,SH3D19,SORL1,SORT1,SPTBN1,STX16,VPS54,WHAMM,ZFYVE20
GO.0040036	regulation of fibroblast growth factor receptor signaling pathway	8	0.00274	FGFR2,HHIP,NGFR,NOG,NPTN,OTX2,PRKD2,SULF1
GO.0007155	cell adhesion	77	0.00298	ABL2,ADAM23,ATP1B1,BCL2L11,BVES,CADM2,CASK,CBLB,CD4,CDH20,CDON,CHL1,CLSTN2,CNTN1,CNTNAP1,DLC1,DST,EFNA1,EFNB2,EPB41L5,EPHA4,FARP2,FAT3,FLRT3,FOXF1,IGLON5,IKZF1,IRF1,IRF4,ITGAV,KIAA1462,KIRREL,KIT,KITLG,LPP,MEGF11,METAP1,MKLN1,MSN,NCAN,NEDD4,NLGN4X,NPNT,NPTN,NRP2,PCDH10,PCDH19,PCDH8,PDPN,PEAK1,PKP4,PLEKHA7,PLXNC1,PPAP2B,PPFIA1,PRKD2,PRKX,PRLR,PTPRT,PVRL4,RC3H1,RC3H2,RELN,RND3,ROBO2,RORA,S1PR1,SLC7…
GO.0007610	behavior	48	0.00298	ABL2,ADCY1,APBA2,ASIC1,ATXN1,BDNF,CACNB4,CASR,CHL1,CLCN3,CNR1,CREBRF,DACH1,DGKI,DMRT3,EPHA4,EPHB2,FBXL20,GIT2,GLS,GNAQ,GRIA1,GRIN2D,ITGA5,JUN,KCNJ10,KCNK10,KCNK2,KIT,MET,NCOA1,NLGN4X,NOVA1,NR4A3,OXR1,PAIP2,PDE8B,PLK2,RCAN2,RELN,RPS6KB1,SCN8A,SLC6A1,SLITRK1,STRN,TMOD2,TNR,ZNF385A
GO.0007613	memory	16	0.00298	ADCY1,ASIC1,CALB1,CNR1,GRIA1,GRIN2B,ITGA5,KCNK10,KCNK2,MECP2,PAIP2,PLK2,RCAN2,RELN,RPS6KB1,SNAP25
GO.0048608	reproductive structure development	41	0.00309	ACVR2A,ARID4A,ARID4B,BCL2L11,BIRC6,E2F7,EGLN1,EIF2S2,EREG,ESR1,FEM1B,FGF9,FGFR2,GAB1,IGF1,IRX5,KDR,KIT,LHX1,LHX9,MAPK14,MDFI,MET,MKL1,NCOA1,NOG,NOTCH1,NR2F2,PRLR,PSAP,ROBO2,SETD2,SIX4,SLC8A1,SLIT2,SP1,SPP1,STOX2,TYRO3,ZFP36L1,ZFPM2
GO.0061053	somite development	14	0.00309	ABI1,ATM,EPB41L5,FOXF1,FRZB,LHX1,MEOX2,NKX3-1,NOG,OTX2,PALB2,PCDH8,SIX4,TBX18
GO.0010033	response to organic substance	164	0.00315	ABL2,ACVR1,ACVR2A,ACVR2B,ADAM10,ADCY1,ADCYAP1,ADIPOR2,AFF3,AGL,AKAP6,AMFR,APH1B,APPL1,ARHGEF2,ARIH1,ATP2B1,ATP6V1C1,BCL2L11,BDNF,BRCA1,CALB1,CBL,CCNT2,CDC73,CDK19,CPEB1,CPEB2,CREBRF,CRKL,CSF1,CTDSP2,DENND4C,DNAJA1,DNAJB5,DNAJC3,DNMT3A,DUSP1,EDEM3,EIF2C2,EIF2C3,EIF2C4,EIF4A2,EIF4E2,EPB41L5,ESR1,ESRRG,FAM59A,FGF9,FGFR2,FLT1,FOXF1,FOXO4,GABRA1,GCNT2,GPAM,GRIN2B,GSK3B,GSTM2,H3F3B,HERPUD1,HSPA9,IRF1,I…
GO.0050890	cognition	28	0.00331	ABL2,ADCY1,ASIC1,ATXN1,BDNF,CALB1,CHL1,CNR1,DGKI,EPHB2,GRIA1,ITGA5,JUN,KCNK10,KCNK2,KIT,MECP2,NLGN4X,PAIP2,PDE8B,PLK2,RCAN2,RELN,RPS6KB1,SLC6A1,TMOD2,TNR,ZNF385A
GO.0051716	cellular response to stimulus	346	0.00337	ABI1,ABI2,ABL2,ACOT11,ACVR1,ACVR2A,ACVR2B,ADAM10,ADCYAP1,ADIPOR2,AKAP6,AMFR,APCDD1,APH1B,APLNR,APOC2,APPL1,ARHGAP12,ARHGAP19,ARHGAP21,ARHGEF2,ARIH1,ARL10,ARL5A,ASIC1,ATM,ATP1B1,ATP2B1,ATP6V1C1,BAG2,BAI3,BBC3,BRCA1,C6orf170,CA7,CACNB4,CALB1,CASR,CBL,CCNT2,CD4,CDC73,CDK19,CDS1,CENPO,CHN2,CLIC2,CLIC4,CLIP1,CNR1,CNTLN,CNTN1,CNTNAP1,COL4A3BP,COPS2,COPS3,COPS8,CPEB1,CPEB2,CREBRF,CRKL,CSF1,CSNK1E,CTDSP2…
GO.0033674	positive regulation of kinase activity	44	0.00347	ABI1,ACVR2B,ADCY1,ADCYAP1,CD4,COPS8,CRKL,CSF1,EFNA1,EPHA4,EREG,FBXW7,FLT1,GAB1,IRS1,KIT,KITLG,MAP2K4,MAP2K7,MAP3K9,MAP4K5,MAPK14,MAPK8IP3,MAPKAPK3,MDFI,MET,MMD,NKX3-1,PDCD10,PIK3CA,PRLR,RAF1,RAP1A,RAPGEF2,RELN,SASH1,SLK,STK24,TENM1,TGFA,TNIK,VANGL2,YWHAB,ZAK
GO.0048706	embryonic skeletal system development	19	0.0037	ACVR2A,ALX4,FGF9,FGFR2,HOXA5,HOXB1,IRX5,LHX1,MDFI,MMP16,MYCN,NDST1,NOG,SATB2,SETD2,SIX4,SP1,SULF1,ZEB1
GO.0061458	reproductive system development	41	0.00377	ACVR2A,ARID4A,ARID4B,BCL2L11,BIRC6,E2F7,EGLN1,EIF2S2,EREG,ESR1,FEM1B,FGF9,FGFR2,GAB1,IGF1,IRX5,KDR,KIT,LHX1,LHX9,MAPK14,MDFI,MET,MKL1,NCOA1,NOG,NOTCH1,NR2F2,PRLR,PSAP,ROBO2,SETD2,SIX4,SLC8A1,SLIT2,SP1,SPP1,STOX2,TYRO3,ZFP36L1,ZFPM2
GO.0038093	Fc receptor signaling pathway	27	0.00407	ABI1,CDKN1B,EIF2C2,EIF2C3,EIF2C4,EREG,FGF9,FGFR2,FOXO4,GAB1,GSK3B,IRS1,JUN,KIT,KITLG,MAP2K4,MAP2K7,MAP3K1,PIK3CA,RAF1,RICTOR,SOS1,TNRC6A,UBE2N,WASL,WIPF1,YWHAB
GO.0007369	gastrulation	21	0.00413	ACVR1,ACVR2A,ACVR2B,APLNR,CDC73,DUSP1,EPB41L5,FAM48A,FGFR2,FOXF1,ITGA5,ITGAV,KIF16B,LHX1,MACF1,NOG,NR4A3,OTX2,PPAP2B,RTF1,VANGL2
GO.0018108	peptidyl-tyrosine phosphorylation	21	0.00413	ABI1,ABI2,ABL2,EPHA4,EPHB2,FGFR1OP,FGFR2,FLT1,KDR,MAP2K4,MAP2K7,MAP3K9,MET,NPTN,NRP2,PEAK1,PRLR,RELN,RET,ROR1,TYRO3
GO.0010976	positive regulation of neuron projection development	25	0.00422	ABL2,CAPRIN2,CNR1,CNTN1,CUX1,EPHA4,GSK3B,ITSN2,MACF1,MAGI2,MAP1B,NDEL1,NGFR,NPTN,OPA1,PACSIN1,PRKCI,RAP1A,RAPGEF2,RELN,RET,ROBO2,SEMA7A,SLIT2,SYT1
GO.0045446	endothelial cell differentiation	13	0.00422	ACVR1,ACVR2B,CLIC4,KDR,MET,MSN,NOTCH1,NR2F2,RAP1A,RAP1B,RAP2C,RAPGEF2,S1PR1
GO.0045927	positive regulation of growth	27	0.00467	ADAM10,AKAP6,ARX,CSF1,DDX3X,FGF9,FGFR1OP,FGFR2,GPAM,GSK3B,H3F3B,H3F3C,IGF1,IKZF1,ITSN2,MACF1,MAP1B,MAPK14,NACA,NDEL1,NOTCH1,POU3F2,PPM1F,RPS6KA1,RPS6KB1,SEMA7A,SYT1
GO.0032486	Rap protein signal transduction	5	0.00484	PLK2,RAP1A,RAP1B,RAP2C,RAPGEF2
GO.0032880	regulation of protein localization	73	0.00488	ABL2,ADCYAP1,AKAP6,ANKRD13C,APPL1,ARFIP1,BAP1,BBC3,BCL2L11,CABP1,CLIP3,CNR1,CREBRF,CTDSPL2,CYLD,DNAJA1,DPP10,EPB41L5,FAM115A,FBXW7,GCC2,GNAQ,GOLPH3L,GOPC,GPAM,GPR27,GSK3B,IGF1,IRS1,ISL1,KIAA0146,KPNA5,MAPK14,MARCKS,MDFI,MMD,MSN,NBPF3,NDEL1,NEK2,PDE8B,PLAGL2,PMAIP1,PPFIA1,PRKCI,PTPN14,RAB11FIP5,RANGRF,RAP1A,RFX3,SCFD1,SEC24A,SIX4,SNAP25,SNX12,SORL1,SPTBN1,STX7,SYBU,TENM1,TMBIM6,UBR5,UHMK1,VEGFC,WA…
GO.0040012	regulation of locomotion	59	0.00488	ABL2,ADAM10,BVES,CLIC4,CSF1,DACH1,DLC1,EFNA1,EFNB2,EPB41L5,FAM115A,FGFR1OP,FLT1,FOXF1,GAB1,GCNT2,IGF1,IL16,IRS1,ITGAV,KDR,KIT,KITLG,MACF1,MAGI2,MAP3K1,MET,MIA3,MSN,NOG,NOTCH1,NR2F2,NRP2,ONECUT2,PDCD10,PPAP2B,PPM1F,PRKD2,PRKX,PTPRG,RAF1,RAP2C,RAPGEF2,RELN,RET,ROBO2,RPS6KB1,S1PR1,SASH1,SCAI,SCRT2,SLC8A1,SLIT2,SORL1,STK24,STRAP,SULF1,WASL,ZNF268
GO.0030155	regulation of cell adhesion	51	0.00497	ADAM10,CASK,CBLB,CD4,CSF1,CYLD,DLC1,EFNA1,EPB41L5,FBLN2,FOXF1,FOXJ1,GCNT2,GPAM,GSK3B,IGF1,IKZF1,IRF1,IRF4,ITGAV,KDR,KNG1,MACF1,MIA3,NOTCH1,NPNT,ONECUT2,PIK3CA,PKP4,PPAP2B,PPM1F,PRKD2,PRKG1,PRKX,PRLR,RASA1,RC3H1,RET,RICTOR,S1PR1,SOCS5,SOCS6,SOS1,SOS2,SPP1,TBX18,TNR,TRIOBP,TSC1,VEGFC,ZEB1
GO.0051179	localization	261	0.00497	ABI1,ABI2,ACVR1,ACVR2B,ADCY1,ADD3,AKAP6,ANK3,ANKRD13C,ANLN,APBA2,APCDD1,APOC2,APPBP2,ARFIP1,ARHGAP21,ARL6IP1,ARX,ATP13A3,ATP1B1,ATXN1,BBC3,BCL2L11,BDNF,BVES,C6orf170,CA7,CACNB2,CASC3,CASR,CBLB,CBLN4,CD4,CDKN1B,CHL1,CLIC2,CLIC4,CLINT1,CLIP1,CLIP3,CNEP1R1,CNTLN,CNTNAP1,COL4A3BP,CREBRF,CUX1,DCX,DENND1B,DENND4C,DENND5B,DGKI,DIXDC1,DPP10,DST,DYNC1LI2,EFNA1,EFNB2,EIF2S2,EIF5A2,ENAH,EPB41L5,EPHA4,ESPL1,…
GO.0030334	regulation of cell migration	53	0.00504	ADAM10,CLIC4,CSF1,DACH1,DLC1,EFNA1,EPB41L5,FAM115A,FGFR1OP,FLT1,FOXF1,GAB1,GCNT2,IGF1,IRS1,ITGAV,KDR,KIT,KITLG,MACF1,MAGI2,MAP3K1,MET,MIA3,MSN,NOG,NOTCH1,NR2F2,NRP2,ONECUT2,PDCD10,PPAP2B,PPM1F,PRKD2,PRKX,PTPRG,RAP2C,RAPGEF2,RELN,RET,RPS6KB1,S1PR1,SASH1,SCAI,SCRT2,SLC8A1,SLIT2,SORL1,STK24,STRAP,SULF1,WASL,ZNF268
GO.0051129	negative regulation of cellular component organization	50	0.00512	ANAPC1,APOC2,ARHGEF2,ATM,BRCA1,CLIP3,DDX3X,DLC1,EFNA1,EPHA4,EPHB2,ESPL1,FBXO43,FGFR2,GOPC,GSK3B,IGF1,INSIG1,JARID2,MAPRE1,MECP2,MTF2,NEK2,NGFR,OPA1,PACSIN1,PAX5,PHF2,PLK2,PPFIA1,RAF1,RAPGEF2,RNF6,ROBO2,S1PR1,SACS,SCFD1,SORL1,SPP1,SPTBN1,STRAP,TMOD2,TMSB10,TNR,TRIM9,TRIOBP,UBR5,ULK2,WAPAL,WASL
GO.0003006	developmental process involved in reproduction	53	0.00523	ACVR1,ACVR2A,AFF4,ARID4A,ARID4B,ATM,BCL2L11,BIRC6,CSF1,DACH1,DIAPH2,E2F7,EGLN1,EIF2S2,EREG,ESR1,FAM9C,FEM1B,FGFR2,GAB1,GOPC,HOOK1,IGF1,IRX5,KDR,LHX1,LHX9,MAPK14,MDFI,MET,MKL1,NCOA1,NOG,NOTCH1,NR2F2,PDE3A,PRLR,PSAP,QKI,ROBO2,RPS6KB1,SETD2,SIX4,SLC8A1,SLIT2,SMARCA2,SP1,SPP1,STOX2,TMSB10,TYRO3,ZFP36L1,ZFPM2
GO.0009719	response to endogenous stimulus	102	0.00536	ACVR1,ACVR2A,ACVR2B,ADCY1,ADIPOR2,AGL,AKAP6,APPL1,ARHGEF2,ATP2B1,ATP6V1C1,BDNF,BRCA1,CBL,CCNT2,CNR1,CPEB1,CPEB2,DENND4C,DNMT3A,DUSP1,EIF2C2,EIF2C3,EIF2C4,EPB41L5,ESR1,ESRRG,FAM59A,FGF9,FGFR2,FOXO4,GAB1,GABRA1,GCNT2,GSK3B,GSTM2,H3F3B,IRS1,ISL1,JUN,KCNJ10,KIAA0146,KIF16B,KITLG,KLF6,KLF9,LHX1,LOX,MAGI2,MAP2,MAP3K1,MAPK14,NDST1,NKX3-1,NOG,NOTCH1,NPAS4,NPFFR1,NR1D2,NR2F2,NR5A2,PIK3CA,PPP1CC,PRKCI,PRLR…
GO.0001701	in utero embryonic development	37	0.00538	ACVR1,ADAM10,APBA2,BCL2L11,BIRC6,COL4A3BP,COPS3,E2F7,EGLN1,EIF2S2,EIF4E2,EPB41L5,FGFR2,FOXF1,GAB1,GABPA,GRIN2B,LMX1B,MAPK8IP3,MDFI,MKL2,NCOA1,NDEL1,NEK2,NOG,NOTCH1,NR2F2,PALB2,RTF1,SETD2,SLC8A1,SLIT2,SOX5,SP1,UBR3,ZFP36L1,ZFPM2
GO.0043507	positive regulation of JUN kinase activity	12	0.00572	EPHA4,GAB1,MAP2K4,MAP2K7,MAP3K1,MAP3K9,MAP4K5,MAPK8IP3,MDFI,SASH1,VANGL2,ZAK
GO.0016358	dendrite development	14	0.00577	ABL2,BDNF,BTBD3,DCX,EPHB2,FARP1,MAP1B,MAP2,MECP2,PRKG1,RBFOX2,RELN,SLC9A6,STRN
GO.0070201	regulation of establishment of protein localization	65	0.00632	ABL2,AKAP6,ANKRD13C,APPL1,ARFIP1,BAP1,BBC3,BCL2L11,CABP1,CLIP3,CNR1,CREBRF,CTDSPL2,CYLD,DNAJA1,DPP10,EPB41L5,FAM115A,FBXW7,GCC2,GNAQ,GOLPH3L,GOPC,GPAM,GPR27,GSK3B,IGF1,IRS1,ISL1,KIAA0146,KPNA5,MAPK14,MARCKS,MDFI,NBPF3,NDEL1,PDE8B,PLAGL2,PMAIP1,PPFIA1,PRKCI,PTPN14,RAB11FIP5,RANGRF,RAP1A,RFX3,SCFD1,SEC24A,SNAP25,SNX12,SORL1,SPTBN1,SYBU,TENM1,TMBIM6,UBR5,UHMK1,VEGFC,WHSC1,WNK3,XPO1,YOD1,YWHAB,YWHAG,…
GO.0007257	activation of JUN kinase activity	9	0.00634	GAB1,MAP2K4,MAP2K7,MAP3K1,MAP3K9,MAP4K5,MAPK8IP3,MDFI,ZAK
GO.1990138	neuron projection extension	9	0.00634	BDNF,DCX,MAP1B,NDEL1,NRP2,SEMA7A,SLC9A6,SLIT2,ULK2
GO.0007254	JNK cascade	14	0.00652	CRKL,GAB1,MAP2K4,MAP2K7,MAP3K1,MAP3K9,MAP4K3,MAP4K5,MAPK8IP3,MDFI,NRK,SH2D3C,TNIK,ZAK
GO.0022604	regulation of cell morphogenesis	44	0.00655	BDNF,BRWD3,BVES,CAPRIN2,CSNK1E,CUX1,CYLD,DLC1,EFNA1,EPB41L5,EPHB2,GAS7,GCNT2,GSK3B,ITSN2,KDR,KIT,MACF1,MAP1B,MKLN1,NDEL1,NEDD4,NGFR,NOTCH1,PALM2,PDPN,POU3F2,PRPF40A,RAPGEF2,RASA1,RELN,RET,RNF6,ROBO2,SEMA7A,SH3D19,SPP1,STRAP,SYT1,TNIK,TNR,TRIOBP,ULK2,WASF3
GO.0051098	regulation of binding	29	0.00656	ABL2,AMFR,CAPRIN2,CDON,CLIC2,EPB41L5,GSK3B,HERPUD1,IGF1,IRF4,ISL1,JUN,MAPRE1,MDFI,NEK2,NKX3-1,NOG,PLCL2,PLK2,RAPGEF2,RSF1,RUVBL2,SORL1,TMBIM6,WAPAL,ZFP90,ZNF268,ZNF462,ZNF675
GO.2000145	regulation of cell motility	55	0.00656	ABL2,ADAM10,CLIC4,CSF1,DACH1,DLC1,EFNA1,EPB41L5,FAM115A,FGFR1OP,FLT1,FOXF1,GAB1,GCNT2,IGF1,IRS1,ITGAV,KDR,KIT,KITLG,MACF1,MAGI2,MAP3K1,MET,MIA3,MSN,NOG,NOTCH1,NR2F2,NRP2,ONECUT2,PDCD10,PPAP2B,PPM1F,PRKD2,PRKX,PTPRG,RAF1,RAP2C,RAPGEF2,RELN,RET,RPS6KB1,S1PR1,SASH1,SCAI,SCRT2,SLC8A1,SLIT2,SORL1,STK24,STRAP,SULF1,WASL,ZNF268
GO.0048562	embryonic organ morphogenesis	31	0.00698	ACVR1,ALX4,EFNA1,EPHB2,FGF9,FGFR2,FOXF1,FRZB,FZD3,HIPK1,HOXA5,HOXB1,INSIG1,IRX5,LHX1,MDFI,MMP16,MYCN,NDST1,NOG,NOTCH1,NR4A3,OTX2,PHACTR4,SATB2,SETD2,SIX4,SP1,TBX18,TSHZ1,ZEB1
GO.0051248	negative regulation of protein metabolic process	79	0.00712	ANAPC1,ASH1L,ATM,BIRC6,BRCA1,CAPRIN2,CD109,CNKSR3,CNOT6L,CPEB1,CPEB2,CRTAP,CTDSP2,DDX3X,DNAJA1,DNAJC3,EIF2C2,EIF2C3,EIF2C4,EIF4E2,FARP1,FBXO43,FGFR1OP,FMR1,FOXJ1,FXR1,FXR2,GNAQ,HERPUD1,HIPK3,IGF1,IGF2BP2,IGF2BP3,ITGAV,ITIH5,JARID2,JUN,KIAA1432,KIRREL,KNG1,MASTL,MDM4,MECP2,MKL1,MTF2,NANOS1,NOG,NR2F2,PAIP2,PAX5,PHB,PPAP2B,PPM1F,QKI,RAF1,RANBP9,RBM26,RECK,RPS6KA1,SAMD4A,SLIT2,SNX12,SOCS5,SOCS6,SORL1…
GO.0048675	axon extension	8	0.00728	BDNF,DCX,MAP1B,NRP2,SEMA7A,SLC9A6,SLIT2,ULK2
GO.0010464	regulation of mesenchymal cell proliferation	9	0.00767	FGF9,FGFR2,FOXF1,IRS1,KDR,MYCN,PHF14,TBX18,ZEB1
GO.0051057	positive regulation of small GTPase mediated signal transduction	9	0.00767	CDON,CSF1,DGKI,IGF1,KITLG,NGFR,RELN,SOS1,SOS2
GO.0060736	prostate gland growth	5	0.00777	ESR1,FGFR2,IGF1,PRLR,PSAP
GO.0010941	regulation of cell death	105	0.00796	ACVR1,ALX4,ANKRD13C,APH1B,ARHGEF2,BBC3,BIRC6,BNIP2,BRCA1,CAST,CBL,CDK19,CHL1,CLIP3,CNR1,CYLD,DCUN1D3,DDX3X,DLC1,DNAJA1,DNAJC3,DNMT3A,ESR1,FAIM,FBXW7,FEM1B,FGFR2,FRZB,FZD3,GPAM,HEBP2,HIPK3,HOXA5,HSPA9,IGF1,IL19,ISL1,ITGA5,ITGAV,KANK2,KCNK2,KDR,KIT,KITLG,KNG1,MAP3K1,MAP3K9,MAP4K4,MDM4,MECP2,MET,MKL1,MTDH,MYCN,NAA15,NACA,NCOA1,NGFRAP1,NKX3-1,NOG,NOTCH1,NR4A3,NRK,OPA1,OXR1,PALB2,PDCD10,PDE3A,PHB,PLAG…
GO.0048704	embryonic skeletal system morphogenesis	15	0.00808	ALX4,FGFR2,HOXA5,HOXB1,IRX5,LHX1,MDFI,MMP16,MYCN,NDST1,NOG,SATB2,SETD2,SIX4,ZEB1
GO.0051403	stress-activated MAPK cascade	17	0.00898	CRKL,GAB1,JUN,MAP2K4,MAP2K7,MAP3K9,MAP4K3,MAP4K5,MAPK14,MAPK8IP3,MAPKAPK3,MDFI,NRK,RPS6KA1,SH2D3C,TNIK,ZAK
GO.0007050	cell cycle arrest	19	0.00899	ATM,CDKN1B,CUL5,DST,DUSP1,FOXO4,GAS2L3,GAS7,HBP1,IRF1,MACF1,MAGI2,NKX3-1,PRKAA2,SESN1,TSC1,UHMK1,ZAK,ZFHX3
GO.0009952	anterior/posterior pattern specification	24	0.009	ABI1,ACVR2A,ACVR2B,ALX4,ATM,CDON,CRKL,EPB41L5,FOXF1,HIPK1,HOXA5,HOXB1,MEOX2,NKX3-1,NOG,NOTCH1,NR2F2,PALB2,PCDH8,PGAP1,TBX18,TSHZ1,VANGL2,YY1
GO.0060541	respiratory system development	25	0.009	ACVR2B,ATXN1,ATXN1L,CUX1,FBXW7,FGF9,FGFR2,FOXF1,FOXJ1,HHIP,HOXA5,IGF1,KDR,LOX,MAPK8IP3,MYCN,NOG,NOTCH1,PHF14,RC3H2,SIX4,SP1,TMBIM6,VANGL2,ZFPM2
GO.0016569	covalent chromatin modification	33	0.00946	ARID4A,ARID4B,ASH1L,ATM,ATXN7L3,BAP1,CDC73,CDYL,CTCFL,DNMT3A,IRF4,JHDM1D,MECP2,MLL3,MSL1,MSL2,NCOA1,PHB,PHF2,PHF20,PPM1F,PRKAA2,RTF1,RUVBL2,RYBP,SETD2,SUV420H2,TBL1XR1,UBE2N,USP49,WDR92,WHSC1,YEATS2
GO.0048639	positive regulation of developmental growth	20	0.0095	AKAP6,ARX,CSF1,FGF9,FGFR2,GPAM,GSK3B,IGF1,IKZF1,ITSN2,MACF1,MAP1B,MAPK14,NACA,NDEL1,NOTCH1,POU3F2,RPS6KB1,SEMA7A,SYT1
GO.0006996	organelle organization	182	0.0101	ABI1,ABI2,ABL2,ACTR6,ANAPC1,ANK3,ANLN,ARHGAP21,ARID2,ATP6V1C1,ATXN7L3,BAP1,BBC3,BCL2L11,BCORL1,BIRC6,BMI1,BRCA1,BRWD3,CAMSAP2,CBX3,CDC73,CDYL,CENPO,CEP135,CEP350,CFL2,CHD9,CLIP1,CLVS2,CNEP1R1,CNTLN,CNTNAP1,COL4A3BP,CSNK1E,CTCFL,DDX3X,DDX6,DIAPH2,DLC1,DNA2,DST,DYNC1LI2,EML1,ENAH,EPB41L5,EREG,ESR1,EXOC5,EYA4,FAM48A,FARP2,FBXW7,FIGN,FOXJ1,GABPA,GAN,GAS2L3,GAS7,GCC2,GNAI3,GOLGB1,GOLPH3L,GOPC,H3F3B,HE…
GO.0061061	muscle structure development	42	0.0102	ACVR1,ALX4,BNIP2,BVES,CACNB4,CAST,CFL2,EGLN1,FGFR2,FOXF1,FOXO4,FXR1,GSK3B,IGF1,ISL1,KLF5,MEOX2,MET,MKL1,MKL2,MYPN,NEBL,NGFR,NOTCH1,NPNT,NR2F2,PAX5,QKI,RORA,S1PR1,SCN8A,SIX4,SLC8A1,SMARCA2,SORT1,SUV420H1,TBX18,TMOD2,TSC1,VANGL2,ZFHX3,ZFPM2
GO.0031346	positive regulation of cell projection organization	29	0.0106	ABL2,CAPRIN2,CNR1,CNTN1,CUX1,EPHA4,GPM6A,GSK3B,ITSN2,KIT,MACF1,MAGI2,MAP1B,NDEL1,NGFR,NPTN,OPA1,PACSIN1,PRKCI,RAP1A,RAPGEF2,RELN,RET,ROBO2,SEMA7A,SLIT2,SYT1,TENM1,WASL
GO.0032269	negative regulation of cellular protein metabolic process	74	0.0106	ANAPC1,ASH1L,ATM,BIRC6,BRCA1,CAPRIN2,CD109,CNKSR3,CNOT6L,CPEB1,CPEB2,CRTAP,CTDSP2,DDX3X,DNAJA1,DNAJC3,EIF2C2,EIF2C3,EIF2C4,EIF4E2,FARP1,FGFR1OP,FMR1,FXR1,FXR2,GNAQ,HERPUD1,HIPK3,IGF1,IGF2BP2,IGF2BP3,ITIH5,JARID2,JUN,KIAA1432,KIRREL,KNG1,MASTL,MECP2,MKL1,MTF2,NANOS1,NOG,NR2F2,PAIP2,PAX5,PHB,PPAP2B,PPM1F,QKI,RAF1,RANBP9,RBM26,RECK,RPS6KA1,SAMD4A,SLIT2,SNX12,SOCS5,SOCS6,SORL1,SPRED2,STRAP,SYNCRIP,TI…
GO.1903827	regulation of cellular protein localization	45	0.0106	AKAP6,APPL1,BAP1,BBC3,BCL2L11,CABP1,CLIP3,CTDSPL2,CYLD,DPP10,FAM115A,FBXW7,GCC2,GNAQ,GOPC,GSK3B,IGF1,KIAA0146,KPNA5,MAPK14,MDFI,MSN,NBPF3,NDEL1,NEK2,PLAGL2,PMAIP1,PPFIA1,PRKCI,PTPN14,RAB11FIP5,RANGRF,SORL1,SPTBN1,STX7,TENM1,UBR5,UHMK1,WAPAL,WNK3,XPO1,YOD1,YWHAB,YWHAG,ZNF268
GO.0006479	protein methylation	15	0.0111	ARID4A,ARID4B,ASH1L,CTCFL,GSPT1,IRF4,MECP2,MLL3,PCMTD1,RTF1,SETD2,SUV420H2,SUZ12,WDR92,WHSC1
GO.2000648	positive regulation of stem cell proliferation	12	0.0112	ATXN1L,FGF9,FGFR2,FOXF1,FZD3,IRS1,KDR,MYCN,NFYA,NOTCH1,TBX18,VEGFC
GO.0010639	negative regulation of organelle organization	30	0.0114	ANAPC1,ARHGEF2,ATM,BRCA1,CLIP3,DLC1,ESPL1,FBXO43,FGFR2,IGF1,INSIG1,JARID2,MAPRE1,MECP2,MTF2,NEK2,OPA1,PAX5,PHF2,PPFIA1,S1PR1,SCFD1,SLIT2,SPTBN1,TMOD2,TMSB10,TRIM9,TRIOBP,UBR5,WAPAL
GO.0045596	negative regulation of cell differentiation	55	0.0117	ARHGEF2,BDNF,CDC73,CYLD,DDX6,DIXDC1,EFNA1,EPHA4,EPHB2,EREG,FOXJ1,FOXO4,FRZB,GABPA,HOXA5,IGF1,INSIG1,IRF1,ISL1,ITGAV,KLF10,LDB2,LMX1A,MEIS2,MKL1,MTF2,MYCN,NGFR,NOG,NOTCH1,PLK2,RAF1,RAPGEF2,RC3H1,RNF6,RORA,RTF1,SIX4,SOCS5,SORL1,SPP1,SS18,STAG2,STRAP,SUZ12,TNR,TOB1,ULK2,VANGL2,ZEB1,ZFHX3,ZFP36L2,ZFPM2,ZNF536,ZNF675
GO.0045844	positive regulation of striated muscle tissue development	10	0.0117	AKAP6,CDON,EFNB2,FGF9,FGFR2,MAPK14,MKL2,NACA,NOTCH1,RPS6KB1
GO.0048170	positive regulation of long-term neuronal synaptic plasticity	4	0.0117	BDNF,EPHB2,KIT,NPTN
GO.0060740	prostate gland epithelium morphogenesis	7	0.0124	ESR1,FEM1B,FGFR2,IGF1,NKX3-1,NOG,NOTCH1
GO.0006892	post-Golgi vesicle-mediated transport	16	0.0125	ANK3,CLINT1,CLVS2,EXOC5,FTH1,GOPC,KIF16B,MACF1,MON2,SCFD1,SH3D19,SORL1,SORT1,SPTBN1,VPS54,ZFYVE20
GO.0016571	histone methylation	12	0.0125	ARID4A,ARID4B,ASH1L,CTCFL,MECP2,MLL3,RTF1,SETD2,SUV420H2,SUZ12,WDR92,WHSC1
GO.0051347	positive regulation of transferase activity	49	0.0125	ABI1,ACVR2B,ADCY1,ADCYAP1,ANAPC1,BMI1,CD4,COPS8,CRKL,CSF1,EFNA1,EPHA4,EREG,FBXW7,FLT1,GAB1,IRS1,KIT,KITLG,MAP2K4,MAP2K7,MAP3K9,MAP4K5,MAPK14,MAPK8IP3,MAPKAPK3,MASTL,MDFI,MET,MMD,NKX3-1,PDCD10,PIK3CA,PRLR,RAF1,RAP1A,RAPGEF2,RELN,SASH1,SLK,SORL1,STK24,TENM1,TGFA,TNIK,UBE2N,VANGL2,YWHAB,ZAK
GO.0010975	regulation of neuron projection development	33	0.0127	ABL2,BDNF,CAPRIN2,CNR1,CNTN1,CUX1,EPHB2,GSK3B,ITSN2,MACF1,MAGI2,MAP1B,NEDD4,NGFR,NPTN,OPA1,PACSIN1,PLK2,POU3F2,PRKCI,RAP1A,RAPGEF2,RELN,RET,RNF6,ROBO2,SEMA7A,SPP1,STK24,SYT1,TNIK,TNR,ULK2
GO.0030850	prostate gland development	9	0.013	ESR1,FEM1B,FGFR2,IGF1,NKX3-1,NOG,NOTCH1,PRLR,PSAP
GO.0051336	regulation of hydrolase activity	91	0.0135	ABL2,ADCY1,ADCYAP1,AKAP6,APOC2,ARHGAP12,ARHGAP19,ARHGAP21,ARHGEF2,ATP1B1,BBC3,BIRC6,BNIP2,BVES,CD109,CDKN1B,CHN2,CPEB2,DDX3X,DENND1B,DENND4C,DENND5B,DGKI,DLC1,EGLN1,EPHA4,ESR1,EVI5,FARP1,FARP2,FGFR2,FICD,FLT1,FOXJ1,GIT2,GNAQ,GSK3B,HERPUD1,ITIH5,ITSN2,JUN,KIAA1432,KIT,KNG1,MAGI2,MASTL,MKL1,MON2,NDEL1,NGFR,NGFRAP1,NKX3-1,NPNT,PKP4,PPM1F,PPME1,PPP2R5E,PPP6R1,PRKD2,PRKG1,PSD3,RAF1,RALGAPA1,RANGRF,RAP…
GO.0003158	endothelium development	13	0.0144	ACVR1,ACVR2B,CLIC4,MET,MSN,NOTCH1,NR2F2,PRKD2,RAP1A,RAP1B,RAP2C,RAPGEF2,S1PR1
GO.0007389	pattern specification process	39	0.0147	ABI1,ACVR1,ACVR2A,ALX4,ATM,BMI1,C6orf170,CDON,CRKL,DMRT3,EPB41L5,FGFR2,FOXF1,FOXJ1,HHIP,HIPK1,HOXA5,ISL1,LMX1B,LRP2,MDFI,MEOX2,MKL1,MTF2,NKX3-1,NOG,NOTCH1,NR2F2,PALB2,PCDH8,PGAP1,RELN,RFX3,SATB2,TBX18,TSHZ1,TTC21B,YY1,ZEB1
GO.0016202	regulation of striated muscle tissue development	15	0.0147	AKAP6,BDNF,CDON,EFNB2,FGF9,FGFR2,KCNK2,MAPK14,MKL2,NACA,NOG,NOTCH1,NR1D2,RPS6KB1,SIX4
GO.0043405	regulation of MAP kinase activity	29	0.0147	DNAJA1,DUSP1,EFNA1,EPHA4,EREG,FLT1,GAB1,HIPK3,KIT,KITLG,MAP2K4,MAP2K7,MAP3K1,MAP3K9,MAP4K5,MAPK14,MAPK8IP3,MAPKAPK3,MDFI,MET,PDCD10,SASH1,SORL1,SPRED2,TENM1,TGFA,VANGL2,ZAK,ZNF675
GO.0016570	histone modification	32	0.0156	ARID4A,ARID4B,ASH1L,ATM,ATXN7L3,BAP1,CDC73,CDYL,CTCFL,IRF4,JHDM1D,MECP2,MLL3,MSL1,MSL2,NCOA1,PHB,PHF2,PHF20,PPM1F,PRKAA2,RTF1,RUVBL2,RYBP,SETD2,SUV420H2,TBL1XR1,UBE2N,USP49,WDR92,WHSC1,YEATS2
GO.0048754	branching morphogenesis of an epithelial tube	19	0.0156	ACVR1,CLIC4,CSF1,ESR1,FGFR2,FOXF1,HHIP,HOXA5,IGF1,KDR,LHX1,MET,MKL1,MYCN,NKX3-1,NOTCH1,NPNT,SLIT2,VANGL2
GO.0001763	morphogenesis of a branching structure	22	0.0164	ACVR1,CLIC4,CSF1,ESR1,FEM1B,FGFR2,FOXF1,HHIP,HOXA5,IGF1,KDR,LHX1,MET,MKL1,MYCN,NKX3-1,NOG,NOTCH1,NPNT,SETD2,SLIT2,VANGL2
GO.0007010	cytoskeleton organization	64	0.0165	ABI1,ABI2,ABL2,ANK3,ANLN,BRCA1,BRWD3,CAMSAP2,CEP135,CEP350,CFL2,CLIP1,CNTLN,CNTNAP1,DIAPH2,DLC1,DST,DYNC1LI2,EML1,ENAH,EPB41L5,FARP2,FGFR1OP,FIGN,FOXJ1,GAN,GAS2L3,GAS7,GCC2,KIAA0101,KIT,KRT76,MAP1B,MAP2,MICAL3,MKLN1,MYPN,NEBL,NRK,PACSIN1,PHACTR4,PLK2,PPP1R9A,PRKG1,PRPF40A,RAF1,RANBP9,RICTOR,RND3,S1PR1,SDAD1,SH3D19,SIX4,SS18,TLN2,TMOD2,TNIK,TRIOBP,VPS54,WASF3,WASL,WHAMM,WIPF1,ZAK
GO.0043067	regulation of programmed cell death	98	0.0165	ACVR1,ALX4,ANKRD13C,APH1B,ARHGEF2,BBC3,BIRC6,BNIP2,BRCA1,CAST,CBL,CDK19,CHL1,CLIP3,CNR1,CYLD,DCUN1D3,DDX3X,DLC1,DNAJA1,DNAJC3,ESR1,FAIM,FBXW7,FEM1B,FGFR2,FRZB,FZD3,GPAM,HIPK3,HOXA5,HSPA9,IGF1,IL19,ISL1,ITGA5,ITGAV,JUN,KANK2,KDR,KIT,KITLG,KNG1,MAP3K1,MAP3K9,MAP4K4,MDM4,MECP2,MET,MKL1,MTDH,NAA15,NACA,NCOA1,NGFRAP1,NKX3-1,NOG,NOTCH1,NR4A3,NRK,OPA1,OXR1,PALB2,PDCD10,PDE3A,PHB,PLAGL2,PLK2,PMAIP1,PPM1F…
GO.0016477	cell migration	60	0.0168	ABI2,ACVR1,ANLN,APCDD1,ARX,ATP1B1,CHL1,CUL5,DCX,DIXDC1,EFNA1,EFNB2,EPB41L5,EPHA4,FLT1,FOXJ1,FZD3,GPM6A,GSK3B,HOXA5,IL16,ISL1,ITGA5,ITGAV,KDR,KITLG,LHX1,MET,MSN,NANOS1,NOTCH1,NR2F2,PDCD10,PEAK1,PHACTR4,PIK3CA,POU3F2,PPAP2B,PRKCI,PRKG1,PRKX,PRPF40A,RAPGEF2,RBFOX2,RPS6KB1,S1PR1,SATB2,SETD2,SIX4,SLC7A11,SLIT2,SOCS7,SOS1,SPP1,TNR,TOP2B,TYRO3,VANGL2,VEGFC,ZEB2
GO.0051270	regulation of cellular component movement	58	0.0168	ABL2,ADAM10,CDKN1B,CLIC4,CSF1,DACH1,DLC1,EFNA1,EPB41L5,FAM115A,FGFR1OP,FLT1,FOXF1,GAB1,GCNT2,GJC1,IGF1,IRS1,ITGAV,KDR,KIT,KITLG,MACF1,MAGI2,MAP3K1,MET,MIA3,MSN,NOG,NOTCH1,NR2F2,NRP2,ONECUT2,PDCD10,PDPN,PPAP2B,PPM1F,PRKD2,PRKX,PTPRG,RAF1,RAP2C,RAPGEF2,RELN,RET,RPS6KB1,S1PR1,SASH1,SCAI,SCRT2,SLC8A1,SLIT2,SORL1,STK24,STRAP,SULF1,WASL,ZNF268
GO.0030036	actin cytoskeleton organization	36	0.017	ABI1,ABI2,ABL2,ARHGEF2,CFL2,DIAPH2,DLC1,ENAH,EPB41L5,FARP2,FOXJ1,GAS2L3,GAS7,KIT,MICAL3,MKLN1,MYPN,NEBL,NRK,PACSIN1,PHACTR4,PPP1R9A,PRKCI,PRKG1,RICTOR,RND3,S1PR1,SDAD1,SIX4,TMOD2,TNIK,TRIOBP,WASF3,WASL,WHAMM,WIPF1
GO.0043517	positive regulation of DNA damage response, signal transduction by p53 class mediator	5	0.0172	ATM,HIC1,PMAIP1,SPRED2,ZNF385A
GO.0060442	branching involved in prostate gland morphogenesis	5	0.0172	ESR1,FEM1B,FGFR2,IGF1,NKX3-1
GO.0007423	sensory organ development	44	0.018	ACVR2B,ATP2B1,BCL2L11,BDNF,C6orf170,CALB1,CDKN1B,CDON,CLIC4,CUX1,FGF9,FRZB,FZD3,GPD2,GPM6A,GRIN2B,IGF1,IKZF1,INSIG1,IRX5,KCNK2,LIN7A,LPPR4,MAP3K1,MEGF11,MEIS2,NHS,NOG,NOTCH1,NR4A3,OTX2,PHACTR4,PRKCI,RET,SLC25A25,SLC7A11,SMOC1,SP1,TBX18,TSHZ1,TUB,VANGL2,YY1,ZEB1
GO.0008104	protein localization	115	0.018	ABL2,ACVR2B,AKAP6,ANK3,ANKRD13C,APBA2,APPBP2,ARFIP1,ARHGEF2,ARL6IP1,ATP1B1,ATP6V1C1,C6orf170,CBLB,CBLN4,CD4,CLIP1,CLIP3,CNEP1R1,CNTLN,CNTNAP1,CSNK1E,DENND1B,DENND4C,DNAJA1,DPP10,EIF5A2,EXOC5,FAM18B1,FAM18B2,FGF9,FRMD6,GOLGA1,GOPC,GPAM,GSK3B,HERPUD1,HOOK1,IPO7,IPO8,IRS1,JUN,LIN7A,LMAN1,LMAN2L,LRP1B,MAPK8IP3,MAPRE1,MCFD2,MDFI,MECP2,MIA3,MON2,NACA,NEDD4,NGFR,NOTCH1,NPNT,NUP153,NXT2,PACSIN1,PAN3,PGAP…
GO.0048729	tissue morphogenesis	49	0.018	ACVR1,ARHGAP12,CALB1,CDON,CLIC4,CSF1,DLC1,EFNB2,EGLN1,ENAH,EPB41L5,EPHA4,ESR1,FEM1B,FOXF1,FRZB,FZD3,HHIP,HIPK1,HOXA5,IGF1,IRX5,ISL1,ITGA5,KDR,MACF1,MEGF11,MET,MKL1,MYCN,NGFR,NKX3-1,NOG,NOTCH1,NPNT,NR4A3,OPA1,PCDH8,PDCD10,PHACTR4,PRKD2,PRKX,S1PR1,SETD2,SIX4,TBX18,TSC1,VEGFC,ZFPM2
GO.0050805	negative regulation of synaptic transmission	10	0.018	ASIC1,BDNF,GRIA1,GRIK3,NLGN4X,PLK2,RAP1A,RAP1B,SLC6A1,TNR
GO.1901699	cellular response to nitrogen compound	46	0.018	ADCY1,AKAP6,APPL1,ARHGEF2,ATP6V1C1,BDNF,BRCA1,CPEB1,CPEB2,DENND4C,DNMT3A,EIF2C2,EIF2C3,EIF2C4,FGF9,FGFR2,FOXO4,GAB1,GABRA1,GSTM2,IRS1,KCNQ3,KIAA0146,KLF10,KLF6,LIN28B,PDE3A,PIK3CA,PRKAA2,PRKCI,PRLR,RAF1,RAP1A,RAP1B,RAPGEF2,RPS6KB1,RRAGD,SLC8A1,SLIT2,SOCS7,SOS1,TSC1,UBR1,YWHAB,YWHAG,ZEB1
GO.0002009	morphogenesis of an epithelium	40	0.0181	ACVR1,ARHGAP12,CLIC4,CSF1,DLC1,EFNB2,ENAH,EPB41L5,EPHA4,ESR1,FEM1B,FGFR2,FOXF1,FRZB,FZD3,HHIP,HOXA5,IGF1,ITGA5,KDR,MET,MKL1,MYCN,NGFR,NKX3-1,NOG,NOTCH1,NPNT,OPA1,PCDH8,PDCD10,PHACTR4,PRKD2,PRKX,RET,SETD2,SIX4,TBX18,TSC1,VEGFC
GO.0043583	ear development	23	0.0181	BCL2L11,BDNF,CDKN1B,CUX1,EPHB2,FGF9,FGFR2,FRZB,FZD3,IGF1,INSIG1,KCNK2,LIN7A,LPPR4,NOG,NOTCH1,NR4A3,OTX2,SIX4,TBX18,TSHZ1,VANGL2,ZEB1
GO.0061138	morphogenesis of a branching epithelium	21	0.0183	ACVR1,CLIC4,CSF1,ESR1,FEM1B,FGFR2,FOXF1,HHIP,HOXA5,IGF1,KDR,LHX1,MET,MKL1,MYCN,NKX3-1,NOG,NOTCH1,NPNT,SLIT2,VANGL2
GO.0007616	long-term memory	7	0.0191	ADCY1,CALB1,GRIA1,MECP2,RELN,RPS6KB1,SNAP25
GO.0031344	regulation of cell projection organization	40	0.0198	ABL2,BDNF,CAPRIN2,CNR1,CNTN1,CUX1,CYLD,EPHB2,GPM6A,GSK3B,ITSN2,KIT,KLF5,MACF1,MAGI2,MAP1B,NEDD4,NGFR,NPTN,OPA1,PACSIN1,PLK2,POU3F2,PRKCI,RAB5A,RAP1A,RAPGEF2,RELN,RET,RNF6,ROBO2,SEMA7A,SPP1,STK24,SYT1,TENM1,TNIK,TNR,ULK2,WASL
GO.0015812	gamma-aminobutyric acid transport	4	0.0201	CACNB4,SLC6A1,SLC6A11,SLC6A13
GO.0018023	peptidyl-lysine trimethylation	6	0.0205	ARID4A,ARID4B,RTF1,SETD2,SUV420H1,SUV420H2
GO.0050770	regulation of axonogenesis	17	0.0206	BDNF,EFNA1,EPHA4,EPHB2,GSK3B,MACF1,MAP1B,NDEL1,NGFR,POU3F2,RET,RNF6,ROBO2,SEMA7A,SPP1,TNR,ULK2
GO.0050678	regulation of epithelial cell proliferation	28	0.0207	CASK,CD109,CDC73,CDKN1B,EFNB2,EREG,FBXW7,FGF9,HOXA5,IGF1,JUN,KDR,KLF9,NKX3-1,NOG,NOTCH1,NR2F2,NRP2,PDCD10,PRKD2,RICTOR,SIX4,STRAP,SULF1,TBX18,TGFA,VASH2,VEGFC
GO.0001756	somitogenesis	11	0.0219	ABI1,ATM,EPB41L5,FOXF1,LHX1,MEOX2,NKX3-1,OTX2,PALB2,PCDH8,TBX18
GO.0032092	positive regulation of protein binding	11	0.0219	ABL2,AMFR,CAPRIN2,EPB41L5,GSK3B,HERPUD1,MAPRE1,PLCL2,PLK2,RAPGEF2,ZNF268
GO.0051145	smooth muscle cell differentiation	8	0.0232	ACVR1,FOXF1,MKL1,MKL2,NOTCH1,NPNT,SMARCA2,TBX18
GO.0035502	metanephric part of ureteric bud development	3	0.0233	CALB1,FOXJ1,LHX1
GO.0043406	positive regulation of MAP kinase activity	23	0.0233	EFNA1,EPHA4,EREG,FLT1,GAB1,KIT,KITLG,MAP2K4,MAP2K7,MAP3K1,MAP3K9,MAP4K5,MAPK14,MAPK8IP3,MAPKAPK3,MDFI,MET,PDCD10,SASH1,TENM1,TGFA,VANGL2,ZAK
GO.0048681	negative regulation of axon regeneration	3	0.0233	EPHA4,SPP1,TNR
GO.0060512	prostate gland morphogenesis	7	0.0234	ESR1,FEM1B,FGFR2,IGF1,NKX3-1,NOG,NOTCH1
GO.0002064	epithelial cell development	22	0.0236	ARID4A,ARID4B,CLIC4,EPB41L5,ESR1,FEM1B,FGFR2,FOXJ1,FRMD6,HOXA5,KLF5,MAGI2,MAP3K1,MET,MSN,NOTCH1,ONECUT2,RAP1A,RAP1B,RAP2C,RAPGEF2,RFX3
GO.0043069	negative regulation of programmed cell death	65	0.0248	ABL2,ACVR1,ARHGEF2,BDNF,BIRC6,BNIP2,BRCA1,CAST,CBL,CDKN1B,CHL1,DDX3X,DNAJA1,DNAJC3,DUSP1,FAIM,FGFR2,FZD3,GPAM,GSK3B,HIPK3,HSPA9,IGF1,IL19,ISL1,ITGA5,ITGAV,JUN,KANK2,KDR,KIT,KITLG,MAP4K4,MDM4,MECP2,MET,MKL1,MTDH,NAA15,NACA,NOG,NOTCH1,NR4A3,OPA1,OXR1,PALB2,PDCD10,PDE3A,PLK2,PRKAA2,PRKCI,PRLR,RASA1,RPS6KA1,SCRT2,SIX4,SOD2,TGFA,TMBIM6,TSC22D1,TYRO3,WNK3,ZFAND6,ZNF268,ZNF385A
GO.0031098	stress-activated protein kinase signaling cascade	18	0.025	CRKL,GAB1,JUN,MAP2K4,MAP2K7,MAP3K9,MAP4K3,MAP4K5,MAPK14,MAPK8IP3,MAPKAPK3,MDFI,RPS6KA1,SH2D3C,SLK,STK24,TNIK,ZAK
GO.0045786	negative regulation of cell cycle	40	0.025	ADCYAP1,ANAPC1,ATM,BRCA1,CAST,CDC73,CTDSP2,CUL5,DST,DUSP1,E2F7,ESPL1,FBXO43,FBXW7,FGFR2,FZD3,GAS2L3,GAS7,HBP1,IRF1,KANK2,MACF1,MAGI2,MDM4,NABP1,NGFR,NKX3-1,NR2F2,PLK2,PRKAA2,SESN1,STAG2,TIMP2,TOP2B,TSC1,UHMK1,WAPAL,ZAK,ZFHX3,ZNF268
GO.0006352	DNA-templated transcription, initiation	29	0.0254	CCNT2,DACH1,ESR1,ESRRG,GLS,GTF2E1,MAML2,MED13,NOTCH1,NR1D2,NR4A3,NR5A2,NRBF2,NRBP1,PRKAA2,RORA,RSF1,RTF1,SESN1,SP1,TAF3,TBPL1,TCF4,TEAD1,TFDP2,TRIM33,TSC1,YWHAB,YWHAG
GO.0090288	negative regulation of cellular response to growth factor stimulus	17	0.026	CASK,CD109,CTDSPL2,NEDD4,NGFR,NOG,NOTCH1,ONECUT2,PPP1CC,SLIT2,STRAP,SULF1,TOB1,TRIM33,VWC2L,XPO1,ZFYVE9
GO.0001945	lymph vessel development	6	0.0261	ACVR2B,EFNB2,KDR,NR2F2,PDPN,PTPN14
GO.0048732	gland development	37	0.0263	AK4,BCL2L11,CACNB4,CAST,CRKL,CSF1,E2F7,ESR1,FEM1B,FGFR2,FOXF1,HOXA5,IGF1,IKZF1,IRS1,ISL1,JARID2,JUN,KRT76,MET,MKL2,NCOA1,NKX3-1,NOG,NOTCH1,ONECUT2,PHF2,PIK3CA,POU3F2,PSAP,RAP1A,RPS6KA1,SIX4,SLIT2,SP1,TGFA,ZDHHC21
GO.0051100	negative regulation of binding	16	0.0267	EPB41L5,GSK3B,ISL1,JUN,MDFI,NEK2,NKX3-1,NOG,RSF1,RUVBL2,SORL1,TMBIM6,WAPAL,ZFP90,ZNF462,ZNF675
GO.0043547	positive regulation of GTPase activity	42	0.0271	ADCYAP1,ARHGAP12,ARHGAP19,ARHGAP21,ARHGEF2,BNIP2,CHN2,DENND1B,DENND4C,DENND5B,DLC1,EVI5,FARP1,FARP2,FOXJ1,GIT2,GNAQ,GSK3B,ITSN2,JUN,KIAA1432,MON2,NDEL1,PKP4,PSD3,RALGAPA1,RANGRF,RAP1A,RAPGEF2,RASA1,RASA2,RGL1,S1PR1,SH2D3C,SMAP1,SNX18,SOS1,SOS2,SYDE1,TBC1D12,TSC1,USP6NL
GO.0042981	regulation of apoptotic process	96	0.0272	ACVR1,ALX4,ANKRD13C,APH1B,ARHGEF2,BBC3,BDNF,BIRC6,BNIP2,BRCA1,CAST,CBL,CDK19,CHL1,CLIP3,CNR1,CYLD,DCUN1D3,DDX3X,DLC1,DNAJA1,DNAJC3,ESR1,FAIM,FBXW7,FEM1B,FGFR2,FRZB,FZD3,GPAM,HIPK3,HOXA5,HSPA9,IGF1,IL19,ISL1,ITGA5,ITGAV,JUN,KDR,KITLG,KNG1,MAP3K1,MAP3K9,MAP4K4,MDM4,MECP2,MKL1,MTDH,NAA15,NACA,NCOA1,NGFRAP1,NKX3-1,NOG,NOTCH1,NR4A3,NRK,OPA1,OXR1,PALB2,PDCD10,PDE3A,PHB,PLAGL2,PLK2,PMAIP1,PPM1F,PRKAA2,P…
GO.0016055	Wnt signaling pathway	25	0.0273	APCDD1,CDC73,CSNK1E,CYLD,DIXDC1,FAM105B,FRZB,FZD3,HBP1,HIC1,HMGXB4,LRP2,MACF1,MAGI2,PPAP2B,PRKAA2,RAB5A,RNF138,RTF1,STRN,TBL1XR1,TNIK,TRABD2B,VANGL2,WIF1
GO.0060341	regulation of cellular localization	85	0.0273	ABL2,AKAP6,APPL1,ARFIP1,ASIC1,BAP1,BBC3,BCL2L11,CABP1,CLIC2,CLIP3,CNR1,CREBRF,CTDSPL2,CYLD,DPP10,FAM115A,FBXW7,FOXF1,GCC2,GNAQ,GOLPH3L,GOPC,GPAM,GPR27,GSK3B,GSTM2,IGF1,INSIG1,IRS1,ISL1,KIAA0146,KPNA5,MAGI2,MAP1B,MAPK14,MARCKS,MDFI,MSN,NBPF3,NCBP2,NDEL1,NEDD4,NEK2,NKX3-1,NOTCH1,NUP153,PDE8B,PLAGL2,PMAIP1,PPFIA1,PRKCI,PTPN14,RAB11FIP5,RAB5A,RANGRF,RAP1B,RFX3,RIMS3,SCFD1,SEC24A,SETD2,SLC8A1,SNAP25,S…
GO.0051093	negative regulation of developmental process	65	0.0274	ARHGEF2,BAI3,BDNF,CDC73,CDKN1B,CYLD,DDX6,DIXDC1,EFNA1,EPHA4,EPHB2,EREG,FBXW7,FOXJ1,FOXO4,FRZB,FZD3,GABPA,HOXA5,IGF1,INSIG1,IRF1,ISL1,ITGAV,KCNK2,KLF10,LDB2,LMX1A,MEIS2,MKL1,MTF2,MYCN,NKX3-1,NOG,NOTCH1,PDCD10,PHF14,PLK2,RAF1,RAPGEF2,RC3H1,RNF6,ROBO2,RORA,RTF1,SIX4,SOCS5,SORL1,SPP1,SS18,STAG2,STRAP,SULF1,SUZ12,TBX18,TNR,TOB1,ULK2,VANGL2,WWC2,ZEB1,ZFHX3,ZFP36L2,ZNF536,ZNF675
GO.0060412	ventricular septum morphogenesis	7	0.0283	EGLN1,FGFR2,MKL1,NOTCH1,VANGL2,WHSC1,ZFPM2
GO.1902589	single-organism organelle organization	129	0.0292	ABI1,ABI2,ABL2,ANAPC1,ANK3,ANLN,ARID2,ARID4A,ARID4B,ASH1L,ATXN7L3,BAP1,BCL2L11,BIRC6,BRCA1,CAMSAP2,CDC73,CDYL,CEP135,CEP350,CFL2,CLCN3,CLIP1,CNTLN,COL4A3BP,CTCFL,DIAPH2,DLC1,DNA2,DNMT3A,DST,DYNC1LI2,EML1,ENAH,EPB41L5,EREG,FARP2,FBXW7,FGFR1OP,FIGN,FOXJ1,GAS2L3,GAS7,GCC2,GNAI3,GOPC,HEBP2,IRF4,JHDM1D,KIAA0101,KIT,MAP1B,MAP2,MAPRE1,MECP2,MICAL3,MKLN1,MLL3,MSL1,MSL2,MYPN,NCOA1,NEBL,NEK9,NRK,ONECUT2,OP…
GO.0048870	cell motility	63	0.0298	ABI2,ACVR1,ANLN,APCDD1,ARX,ATP1B1,CHL1,CUL5,DCX,DIXDC1,DNAJA1,DST,EFNA1,EFNB2,EPB41L5,EPHA4,FLT1,FOXJ1,FZD3,GPM6A,GSK3B,HOXA5,IL16,ISL1,ITGA5,ITGAV,KDR,KITLG,LHX1,MET,MSN,NANOS1,NOTCH1,NR2F2,PDCD10,PEAK1,PHACTR4,PIK3CA,POU3F2,PPAP2B,PRKCI,PRKG1,PRKX,PRPF40A,RAPGEF2,RBFOX2,RFX3,RPS6KB1,S1PR1,SATB2,SETD2,SIX4,SLC7A11,SLIT2,SOCS7,SOS1,SPP1,TNR,TOP2B,TYRO3,VANGL2,VEGFC,ZEB2
GO.0050808	synapse organization	17	0.0301	ANK3,BSN,CACNB2,CACNB4,FARP1,FGFR2,GPM6A,MAGI2,MECP2,NEDD4,NFIA,NLGN4X,PCDHB4,RELN,SLC9A6,TNR,TSC1
GO.0050803	regulation of synapse structure or activity	23	0.0311	BAI3,BDNF,CALB1,CLSTN2,FLRT3,GRIA1,GRIN2B,KCNJ10,KIT,LRRTM3,MAGI2,MECP2,NCDN,NEDD4,NPTN,PLK2,RAPGEF2,RELN,ROBO2,SIX4,SLITRK1,TNR,YWHAG
GO.0007612	learning	16	0.0313	ABL2,ASIC1,ATXN1,BDNF,DGKI,EPHB2,GRIN2B,JUN,KIT,MECP2,NLGN4X,PDE8B,RELN,SLC6A1,SNAP25,TNR
GO.0060548	negative regulation of cell death	68	0.0316	ABL2,ACVR1,ARHGEF2,BDNF,BIRC6,BNIP2,BRCA1,CAST,CBL,CDKN1B,CHL1,DDX3X,DNAJA1,DNAJC3,DUSP1,FAIM,FGFR2,FZD3,GPAM,GSK3B,HIPK3,HSPA9,IGF1,IL19,ISL1,ITGA5,ITGAV,JUN,KANK2,KDR,KIT,KITLG,MAP4K4,MDM4,MECP2,MET,MKL1,MTDH,NAA15,NACA,NOG,NOTCH1,NR4A3,OPA1,OXR1,PALB2,PDCD10,PDE3A,PLK2,PRKAA2,PRKCI,PRLR,PSAP,RASA1,RPS6KA1,SCRT2,SIX4,SOD2,SORL1,TGFA,TMBIM6,TSC22D1,TYRO3,WNK3,ZFAND6,ZFPM2,ZNF268,ZNF385A
GO.0000165	MAPK cascade	22	0.0317	CRKL,GAB1,IGF1,ITGAV,JUN,MAP2K4,MAP2K7,MAP3K9,MAP4K3,MAP4K5,MAPK14,MAPK8IP3,MAPKAPK3,MDFI,NDST1,RAPGEF2,RET,RPS6KA1,SH2D3C,TNIK,YWHAB,ZAK
GO.0007184	SMAD protein import into nucleus	4	0.0317	JUN,SPTBN1,TOB1,ZFYVE9
GO.0038180	nerve growth factor signaling pathway	4	0.0317	MAGI2,RAP1A,RAPGEF2,SORT1
GO.0048010	vascular endothelial growth factor receptor signaling pathway	15	0.0317	ABI1,FLT1,ITGAV,KDR,MAPK14,MAPKAPK3,NRP2,PIK3CA,PRKD2,RAF1,RASA1,RICTOR,SULF1,VEGFC,YWHAB
GO.0051099	positive regulation of binding	15	0.0317	ABL2,AMFR,CAPRIN2,CLIC2,EPB41L5,GSK3B,HERPUD1,IGF1,IRF4,ISL1,MAPRE1,PLCL2,PLK2,RAPGEF2,ZNF268
GO.0048679	regulation of axon regeneration	5	0.0322	EPHA4,NDEL1,SPP1,STK24,TNR
GO.0048167	regulation of synaptic plasticity	16	0.0336	BDNF,CALB1,EPHB2,GRIA1,GRIN2B,KCNJ10,KIT,MECP2,NCDN,NPTN,PLK2,RAPGEF2,RELN,SNAP25,TNR,YWHAG
GO.0006367	transcription initiation from RNA polymerase II promoter	26	0.034	CCNT2,DACH1,ESR1,ESRRG,GLS,GTF2E1,MAML2,MED13,NOTCH1,NR1D2,NR4A3,NR5A2,NRBF2,NRBP1,PRKAA2,RORA,SESN1,SP1,TAF3,TCF4,TEAD1,TFDP2,TRIM33,TSC1,YWHAB,YWHAG
GO.0033036	macromolecule localization	132	0.0354	ABL2,ACVR2B,AKAP6,ANK3,ANKRD13C,APBA2,APOC2,APPBP2,ARFIP1,ARHGEF2,ARL6IP1,ATP1B1,ATP6V1C1,C6orf170,CASC3,CBLB,CBLN4,CD4,CLIP1,CLIP3,CNEP1R1,CNTLN,CNTNAP1,COL4A3BP,CSNK1E,DENND1B,DENND4C,DNAJA1,DPP10,EIF5A2,EXOC5,FAM18B1,FAM18B2,FGF9,FMR1,FRMD6,GLTP,GOLGA1,GOPC,GPAM,GSK3B,HERPUD1,HOOK1,IGF2BP2,IGF2BP3,IPO7,IPO8,IRS1,JUN,LDLR,LIN7A,LMAN1,LMAN2L,LRP1B,MAPK8IP3,MAPRE1,MCFD2,MDFI,MECP2,MIA3,MON2,NACA,…
GO.0046907	intracellular transport	91	0.036	AKAP6,ANK3,APPBP2,ARFIP1,ARHGAP21,ARHGEF2,ARL6IP1,ATP1B1,ATXN1,BBC3,BCL2L11,CBLB,CLINT1,CLIP1,CLVS2,COL4A3BP,CUX1,ENAH,EVI5,EXOC5,FGF9,FTH1,GOLGA1,GOPC,GSK3B,HEBP2,HERPUD1,HMGXB4,HOOK1,IPO7,IPO8,JUN,KIAA1432,KIF16B,KIT,KPNA5,LMAN1,LMAN2L,LRBA,MAGI2,MAP1B,MON2,NCBP2,NEDD4,NGFR,NMT2,NPTX1,NRBP1,NUP153,OPA1,PAN3,PGAP1,PMAIP1,PRKAA2,RAB20,RAB5A,RAB5B,RANGRF,RHOT1,SCFD1,SDAD1,SEC22A,SH3D19,SLC8A1,SNAP…
GO.0044089	positive regulation of cellular component biogenesis	32	0.0368	BAI3,BBC3,BCL2L11,BDNF,CDKN1B,CLIP1,CLSTN2,CNOT6,CNOT6L,EPB41L5,EPHB2,FLRT3,GPM6A,GSK3B,JUN,KDR,KIAA0146,KIRREL,KIT,LDB2,LRRTM3,MAGI2,MAP3K1,MECP2,PAN3,PMAIP1,PPM1F,RICTOR,SLITRK1,TENM1,TSC1,WASL
GO.0007015	actin filament organization	19	0.038	ABI1,ABI2,ABL2,ARHGEF2,CFL2,DIAPH2,ENAH,GAS7,MICAL3,NEBL,PACSIN1,PPP1R9A,PRKCI,TMOD2,TMSB10,WASF3,WASL,WHAMM,WIPF1
GO.0018022	peptidyl-lysine methylation	10	0.0385	ARID4A,ARID4B,ASH1L,IRF4,MLL3,RTF1,SETD2,SUV420H2,WDR92,WHSC1
GO.1902582	single-organism intracellular transport	81	0.0396	AKAP6,ANK3,ARHGAP21,ARL6IP1,ATP1B1,BBC3,BCL2L11,CBLB,CLINT1,CLIP1,CLVS2,COL4A3BP,CUX1,EVI5,EXOC5,FGF9,FTH1,GOLGA1,GOPC,GSK3B,HEBP2,HERPUD1,HMGXB4,HOOK1,IPO7,JUN,KIAA1432,KIF16B,KIT,KPNA5,LMAN1,LMAN2L,LRBA,MAP1B,MON2,NCBP2,NEDD4,NPTX1,NRBP1,OPA1,PAN3,PMAIP1,PRKAA2,RAB5A,RAB5B,RANGRF,RHOT1,SCFD1,SDAD1,SEC22A,SEC23A,SEC24A,SH3D19,SLC8A1,SNAP25,SNX16,SNX18,SNX4,SORL1,SORT1,SPTBN1,SRP72,SSR3,STYX,TIMM…
GO.0070727	cellular macromolecule localization	81	0.0406	ABL2,AKAP6,ANK3,ANKRD13C,APPBP2,ARFIP1,ARHGEF2,ARL6IP1,ATP1B1,C6orf170,CASC3,CBLB,CD4,CLIP1,CNEP1R1,CNTLN,CNTNAP1,CSNK1E,DENND4C,DNAJA1,DPP10,FGF9,FRMD6,GOLGA1,GOPC,GSK3B,HERPUD1,IPO7,IPO8,IRS1,JUN,KPNA5,LIN7A,MAPRE1,MDFI,NEDD4,NGFR,PACSIN1,PAN3,PGAP1,PRKCI,RAB20,RAB5A,RAB5B,RANGRF,RAPGEF2,RELN,RRAGD,RUVBL2,SEC23A,SEC24A,SIX4,SNX16,SNX18,SORL1,SPTBN1,SRP72,SSR3,STX16,STX7,STYX,TAF3,TIMM17A,TIMM8B…
GO.0035282	segmentation	13	0.0421	ABI1,ATM,BMI1,EPB41L5,FOXF1,LHX1,MEOX2,MTF2,NKX3-1,OTX2,PALB2,PCDH8,TBX18
GO.0006325	chromatin organization	51	0.0426	ACTR6,ARID2,ASH1L,ATM,ATXN7L3,BAP1,BCORL1,BMI1,CBX3,CDC73,CDYL,CENPO,CHD9,CTCFL,ESR1,EYA4,FAM48A,H3F3B,HIST1H2BN,HMGXB4,IKZF1,IRF4,JARID2,JHDM1D,MECP2,MLL3,MSL1,MSL2,MTA3,MTF2,NAP1L5,PHB,PHF2,PHF20,PPM1F,PRKAA2,RSF1,RTF1,RUVBL2,RYBP,SATB2,SETD2,SMARCA2,SUV420H2,TBL1XR1,TOX,UBE2N,USP49,WDR92,YEATS2,ZNF462
GO.0031061	negative regulation of histone methylation	5	0.0434	BRCA1,JARID2,MECP2,MTF2,PAX5
GO.0051150	regulation of smooth muscle cell differentiation	5	0.0434	EREG,FGFR2,FOXF1,FOXO4,ZEB1
GO.0051674	localization of cell	62	0.044	ABI2,ACVR1,ANLN,APCDD1,ARX,ATP1B1,CHL1,CUL5,DCX,DIXDC1,DNAJA1,DST,EFNA1,EFNB2,EPB41L5,EPHA4,FLT1,FOXJ1,FZD3,GPM6A,GSK3B,HOXA5,IL16,ISL1,ITGA5,ITGAV,KDR,KITLG,MET,MSN,NANOS1,NOTCH1,NR2F2,PDCD10,PEAK1,PHACTR4,PIK3CA,POU3F2,PPAP2B,PRKCI,PRKG1,PRKX,PRPF40A,RAPGEF2,RBFOX2,RFX3,RPS6KB1,S1PR1,SATB2,SETD2,SIX4,SLC7A11,SLIT2,SOCS7,SOS1,SPP1,TNR,TOP2B,TYRO3,VANGL2,VEGFC,ZEB2
GO.0035239	tube morphogenesis	33	0.0447	ACVR1,ACVR2B,BCL2L11,CLIC4,CSF1,DLC1,EFNB2,ENAH,EPB41L5,EPHA4,ESR1,FOXF1,FZD3,HHIP,HOXA5,IGF1,KDR,MET,MKL1,MYCN,NKX3-1,NOG,NOTCH1,NPNT,NR4A3,OPA1,PHACTR4,PRKD2,PRKX,RET,SETD2,TSC1,ZEB1
GO.0048145	regulation of fibroblast proliferation	12	0.0451	BMI1,CDC73,DACH1,EREG,ESR1,FOSL2,FTH1,IGF1,JUN,NGFR,PMAIP1,WAPAL
GO.0046578	regulation of Ras protein signal transduction	13	0.0459	ABL2,ARHGEF2,CSF1,DGKI,DLC1,IGF1,KITLG,NGFR,RAF1,RASA1,RASA2,SCAI,TIMP2
GO.0010810	regulation of cell-substrate adhesion	19	0.0462	CASK,CSF1,DLC1,EPB41L5,FBLN2,FOXF1,GCNT2,GSK3B,KDR,MACF1,NOTCH1,NPNT,ONECUT2,PPM1F,RASA1,SPP1,TRIOBP,TSC1,VEGFC
GO.0021954	central nervous system neuron development	11	0.0471	ARX,DCX,EPHA4,EPHB2,FGFR2,GNAQ,MAP2,NDEL1,RAPGEF2,ROBO2,SLIT2
GO.0035278	negative regulation of translation involved in gene silencing by miRNA	4	0.0471	EIF2C2,EIF2C3,EIF2C4,TNRC6A
GO.0061162	establishment of monopolar cell polarity	4	0.0471	FOXF1,FOXJ1,MAP1B,PRKCI
GO.1903729	regulation of plasma membrane organization	11	0.0471	APPL1,CLIP3,DPP10,GOPC,PPFIA1,PRKCI,RANGRF,SPTBN1,STX7,WASL,WNK3
GO.0048839	inner ear development	20	0.0476	BDNF,CDKN1B,CUX1,EPHB2,FGF9,FGFR2,FRZB,FZD3,IGF1,INSIG1,KCNK2,LIN7A,LPPR4,NOTCH1,NR4A3,OTX2,SIX4,TBX18,VANGL2,ZEB1
GO.0040017	positive regulation of locomotion	33	0.0479	ADAM10,BVES,CSF1,EPB41L5,FGFR1OP,FLT1,FOXF1,GCNT2,IGF1,IL16,IRS1,ITGAV,KDR,KIT,KITLG,MET,MIA3,NOTCH1,NRP2,ONECUT2,PDCD10,PPAP2B,PPM1F,PRKD2,RAPGEF2,RELN,RET,RPS6KB1,S1PR1,SASH1,SLC8A1,SLIT2,ZNF268
GO.0032147	activation of protein kinase activity	29	0.0485	ABI1,ACVR2B,ADCY1,COPS8,CRKL,EFNA1,EREG,GAB1,KIT,MAP2K4,MAP2K7,MAP3K9,MAP4K5,MAPK14,MAPK8IP3,MAPKAPK3,MDFI,MET,NKX3-1,PIK3CA,PRLR,RAF1,RAP1A,SLK,STK24,TGFA,TNIK,YWHAB,ZAK
GO.0050847	progesterone receptor signaling pathway	3	0.0486	NEDD4,PHB,UBR5
GO.0043393	regulation of protein binding	18	0.0489	ABL2,AMFR,CAPRIN2,CDON,EPB41L5,GSK3B,HERPUD1,ISL1,MAPRE1,NKX3-1,NOG,PLCL2,PLK2,RAPGEF2,RUVBL2,SORL1,TMBIM6,ZNF268
GO.0046328	regulation of JNK cascade	18	0.0489	DIXDC1,DNAJA1,EPHA4,GAB1,HIPK3,MAP2K4,MAP2K7,MAP3K1,MAP3K9,MAP4K4,MAP4K5,MDFI,NRK,SASH1,TNIK,VANGL2,ZAK,ZNF675
GO.0010828	positive regulation of glucose transport	8	0.049	ADIPOR2,CLIP3,IGF1,IRS1,MAPK14,MET,PRKCI,RAP1A
